# Supplementary material for: Standing Watch: Baselining Predictable Events That Influence Maritime Operations in the Context of the UN Sustainable Development Goals
Source: Preprints.org preprint supplement (doi:10.20944/preprints202403.1522.v1), 2024-03-26
Supplement: Supplementary file 1 [file supplementary]

## Sheet: landing page
Seasonal Event Matrix - Operational Categories
Bruce Lambert and Jim Merten, PhD Candidates, Universtity of Antwerp
bruce.lambert@student.uantwerp.be, james.merten@student.uantwerpen.be
Landing page	Look at Events - then sort by Region
	Look at Events based on operational expectations
	Look at Events based on Enviromental -Sustainability
	Look at Raw Data
	Look at Pivot Table to fact check number of elements in a category, event

## Sheet: master sheet-event
** This is the raw data- which can be modified, revised, subtracted or added to as requested. -suggest you back up and original if you make changes, and look at the Correction Table to doublecheck errors
OID_	NRI_ID	State Name	State Name Abbreviation	State FIPS Code	County Name	County Type	State-County FIPS Code	Realm	Navigation	Coastal	Deep Draft	Lock/Dam	River	Source-	Category	3es	Event	Month	note
1	C01001	Alabama	AL	01	Autauga	County	01001	EMC	Y	N	N	N	Alabama - Coosa	Lit	Metrological	Enviromental	Heat Wave	June
1	C01001	Alabama	AL	01	Autauga	County	01001	EMC	Y	N	N	N	Alabama - Coosa	FEMA	Metrological	Enviromental	Cold Wave	November
1	C01001	Alabama	AL	01	Autauga	County	01001	EMC	Y	N	N	N	Alabama - Coosa	FEMA	Metrological	Enviromental	Cold Wave	December
1	C01001	Alabama	AL	01	Autauga	County	01001	EMC	Y	N	N	N	Alabama - Coosa	FEMA	Metrological	Enviromental	Cold Wave	January
1	C01001	Alabama	AL	01	Autauga	County	01001	EMC	Y	N	N	N	Alabama - Coosa	FEMA	Metrological	Enviromental	Cold Wave	February
1	C01001	Alabama	AL	01	Autauga	County	01001	EMC	Y	N	N	N	Alabama - Coosa	FEMA	Metrological	Enviromental	Winter Weather	November
1	C01001	Alabama	AL	01	Autauga	County	01001	EMC	Y	N	N	N	Alabama - Coosa	FEMA	Metrological	Enviromental	Winter Weather	December
1	C01001	Alabama	AL	01	Autauga	County	01001	EMC	Y	N	N	N	Alabama - Coosa	FEMA	Metrological	Enviromental	Winter Weather	January
1	C01001	Alabama	AL	01	Autauga	County	01001	EMC	Y	N	N	N	Alabama - Coosa	FEMA	Metrological	Enviromental	Winter Weather	February
1	C01001	Alabama	AL	01	Autauga	County	01001	EMC	Y	N	N	N	Alabama - Coosa	FEMA	Metrological	Enviromental	Winter Weather	March
1	C01001	Alabama	AL	01	Autauga	County	01001	EMC	Y	N	N	N	Alabama - Coosa	FEMA	Metrological	Enviromental	Hurricane	November
1	C01001	Alabama	AL	01	Autauga	County	01001	EMC	Y	N	N	N	Alabama - Coosa	FEMA	Metrological	Enviromental	Hurricane	June
1	C01001	Alabama	AL	01	Autauga	County	01001	EMC	Y	N	N	N	Alabama - Coosa	FEMA	Metrological	Enviromental	Hurricane	July
1	C01001	Alabama	AL	01	Autauga	County	01001	EMC	Y	N	N	N	Alabama - Coosa	FEMA	Metrological	Enviromental	Hurricane	August
1	C01001	Alabama	AL	01	Autauga	County	01001	EMC	Y	N	N	N	Alabama - Coosa	FEMA	Metrological	Enviromental	Hurricane	September
1	C01001	Alabama	AL	01	Autauga	County	01001	EMC	Y	N	N	N	Alabama - Coosa	FEMA	Metrological	Enviromental	Hurricane	October
1	C01001	Alabama	AL	01	Autauga	County	01001	EMC	Y	N	N	N	Alabama - Coosa	FEMA	Metrological	Enviromental	Heat Wave	July
1	C01001	Alabama	AL	01	Autauga	County	01001	EMC	Y	N	N	N	Alabama - Coosa	FEMA	Metrological	Enviromental	Heat Wave	August
1	C01001	Alabama	AL	01	Autauga	County	01001	EMC	Y	N	N	N	Alabama - Coosa	FEMA	Metrological	Enviromental	Heat Wave	September
1	C01001	Alabama	AL	01	Autauga	County	01001	DA	Y	N	N	N	Alabama - Coosa	Lit	Maritime	Equity	Recreational Boating	June
1	C01001	Alabama	AL	01	Autauga	County	01001	EMC	Y	N	N	N	Alabama - Coosa	FEMA	Metrological	Enviromental	Cold Wave	March
1	C01001	Alabama	AL	01	Autauga	County	01001	EMC	Y	N	N	N	Alabama - Coosa	FEMA	Non Seasonal	Enviromental	Volcano
1	C01001	Alabama	AL	01	Autauga	County	01001	EMC	Y	N	N	N	Alabama - Coosa	FEMA	Non Seasonal	Enviromental	Earthquake
1	C01001	Alabama	AL	01	Autauga	County	01001	EMC	Y	N	N	N	Alabama - Coosa	FEMA	Geotechnical	Enviromental	Avalanche
1	C01001	Alabama	AL	01	Autauga	County	01001	EMC	Y	N	N	N	Alabama - Coosa	FEMA	Non Seasonal	Enviromental	Tsunami
1	C01001	Alabama	AL	01	Autauga	County	01001	EMC	Y	N	N	N	Alabama - Coosa	FEMA	Metrological	Enviromental	Hail	February
1	C01001	Alabama	AL	01	Autauga	County	01001	EMC	Y	N	N	N	Alabama - Coosa	FEMA	Metrological	Enviromental	Hail	March
1	C01001	Alabama	AL	01	Autauga	County	01001	EMC	Y	N	N	N	Alabama - Coosa	FEMA	Metrological	Enviromental	Hail	April
1	C01001	Alabama	AL	01	Autauga	County	01001	EMC	Y	N	N	N	Alabama - Coosa	FEMA	Metrological	Enviromental	Hail	May
1	C01001	Alabama	AL	01	Autauga	County	01001	EMC	Y	N	N	N	Alabama - Coosa	FEMA	Metrological	Enviromental	Hail	June
1	C01001	Alabama	AL	01	Autauga	County	01001	EMC	Y	N	N	N	Alabama - Coosa	FEMA	Ecological	Enviromental	Wildfire	December
1	C01001	Alabama	AL	01	Autauga	County	01001	EMC	Y	N	N	N	Alabama - Coosa	FEMA	Ecological	Enviromental	Wildfire	February
1	C01001	Alabama	AL	01	Autauga	County	01001	EMC	Y	N	N	N	Alabama - Coosa	FEMA	Ecological	Enviromental	Wildfire	January
1	C01001	Alabama	AL	01	Autauga	County	01001	EMC	Y	N	N	N	Alabama - Coosa	FEMA	Ecological	Enviromental	Wildfire	March
1	C01001	Alabama	AL	01	Autauga	County	01001	EMC	Y	N	N	N	Alabama - Coosa	FEMA	Ecological	Enviromental	Wildfire	November
1	C01001	Alabama	AL	01	Autauga	County	01001	EMC	Y	N	N	N	Alabama - Coosa	FEMA	Ecological	Enviromental	Wildfire	September
1	C01001	Alabama	AL	01	Autauga	County	01001	EMC	Y	N	N	N	Alabama - Coosa	FEMA	Ecological	Enviromental	Wildfire	April
1	C01001	Alabama	AL	01	Autauga	County	01001	EMC	Y	N	N	N	Alabama - Coosa	FEMA	Ecological	Enviromental	Wildfire	October
24	C01047	Alabama	AL	01	Dallas	County	01047	EMC	Y	N	N	N	Alabama - Coosa	FEMA	Metrological	Enviromental	Cold Wave	November
24	C01047	Alabama	AL	01	Dallas	County	01047	EMC	Y	N	N	N	Alabama - Coosa	FEMA	Metrological	Enviromental	Cold Wave	December
24	C01047	Alabama	AL	01	Dallas	County	01047	EMC	Y	N	N	N	Alabama - Coosa	FEMA	Metrological	Enviromental	Cold Wave	January
24	C01047	Alabama	AL	01	Dallas	County	01047	EMC	Y	N	N	N	Alabama - Coosa	FEMA	Metrological	Enviromental	Cold Wave	February
24	C01047	Alabama	AL	01	Dallas	County	01047	EMC	Y	N	N	N	Alabama - Coosa	FEMA	Metrological	Enviromental	Winter Weather	November
24	C01047	Alabama	AL	01	Dallas	County	01047	EMC	Y	N	N	N	Alabama - Coosa	FEMA	Metrological	Enviromental	Winter Weather	December
24	C01047	Alabama	AL	01	Dallas	County	01047	EMC	Y	N	N	N	Alabama - Coosa	FEMA	Metrological	Enviromental	Winter Weather	January
24	C01047	Alabama	AL	01	Dallas	County	01047	EMC	Y	N	N	N	Alabama - Coosa	FEMA	Metrological	Enviromental	Winter Weather	February
24	C01047	Alabama	AL	01	Dallas	County	01047	EMC	Y	N	N	N	Alabama - Coosa	FEMA	Metrological	Enviromental	Winter Weather	March
24	C01047	Alabama	AL	01	Dallas	County	01047	EMC	Y	N	N	N	Alabama - Coosa	FEMA	Metrological	Enviromental	Hurricane	November
24	C01047	Alabama	AL	01	Dallas	County	01047	EMC	Y	N	N	N	Alabama - Coosa	FEMA	Metrological	Enviromental	Hurricane	June
24	C01047	Alabama	AL	01	Dallas	County	01047	EMC	Y	N	N	N	Alabama - Coosa	FEMA	Metrological	Enviromental	Hurricane	July
24	C01047	Alabama	AL	01	Dallas	County	01047	EMC	Y	N	N	N	Alabama - Coosa	FEMA	Metrological	Enviromental	Hurricane	August
24	C01047	Alabama	AL	01	Dallas	County	01047	EMC	Y	N	N	N	Alabama - Coosa	FEMA	Metrological	Enviromental	Hurricane	September
24	C01047	Alabama	AL	01	Dallas	County	01047	EMC	Y	N	N	N	Alabama - Coosa	FEMA	Metrological	Enviromental	Hurricane	October
1	C01001	Alabama	AL	01	Autauga	County	01001	DA	Y	N	N	N	Alabama - Coosa	Lit	Maritime	Equity	Recreational Boating	July
1	C01001	Alabama	AL	01	Autauga	County	01001	DA	Y	N	N	N	Alabama - Coosa	Lit	Maritime	Equity	Recreational Boating	August
1	C01001	Alabama	AL	01	Autauga	County	01001	DA	Y	N	N	N	Alabama - Coosa	Lit	Maritime	Equity	Recreational Boating	September
1	C01001	Alabama	AL	01	Autauga	County	01001	DA	Y	N	N	N	Alabama - Coosa	Lit	Maritime	Equity	Recreational Boating	May
24	C01047	Alabama	AL	01	Dallas	County	01047	EMC	Y	N	N	N	Alabama - Coosa	FEMA	Metrological	Enviromental	Cold Wave	March
24	C01047	Alabama	AL	01	Dallas	County	01047	EMC	Y	N	N	N	Alabama - Coosa	FEMA	Non Seasonal	Enviromental	Volcano
24	C01047	Alabama	AL	01	Dallas	County	01047	EMC	Y	N	N	N	Alabama - Coosa	FEMA	Non Seasonal	Enviromental	Earthquake
24	C01047	Alabama	AL	01	Dallas	County	01047	EMC	Y	N	N	N	Alabama - Coosa	FEMA	Geotechnical	Enviromental	Avalanche
24	C01047	Alabama	AL	01	Dallas	County	01047	EMC	Y	N	N	N	Alabama - Coosa	FEMA	Non Seasonal	Enviromental	Tsunami
24	C01047	Alabama	AL	01	Dallas	County	01047	EMC	Y	N	N	N	Alabama - Coosa	FEMA	Metrological	Enviromental	Hail	February
24	C01047	Alabama	AL	01	Dallas	County	01047	EMC	Y	N	N	N	Alabama - Coosa	FEMA	Metrological	Enviromental	Hail	March
24	C01047	Alabama	AL	01	Dallas	County	01047	EMC	Y	N	N	N	Alabama - Coosa	FEMA	Metrological	Enviromental	Hail	April
24	C01047	Alabama	AL	01	Dallas	County	01047	EMC	Y	N	N	N	Alabama - Coosa	FEMA	Metrological	Enviromental	Hail	May
24	C01047	Alabama	AL	01	Dallas	County	01047	EMC	Y	N	N	N	Alabama - Coosa	FEMA	Metrological	Enviromental	Hail	June
24	C01047	Alabama	AL	01	Dallas	County	01047	EMC	Y	N	N	N	Alabama - Coosa	FEMA	Ecological	Enviromental	Wildfire	December
24	C01047	Alabama	AL	01	Dallas	County	01047	EMC	Y	N	N	N	Alabama - Coosa	FEMA	Ecological	Enviromental	Wildfire	February
24	C01047	Alabama	AL	01	Dallas	County	01047	EMC	Y	N	N	N	Alabama - Coosa	FEMA	Ecological	Enviromental	Wildfire	January
24	C01047	Alabama	AL	01	Dallas	County	01047	EMC	Y	N	N	N	Alabama - Coosa	FEMA	Ecological	Enviromental	Wildfire	March
24	C01047	Alabama	AL	01	Dallas	County	01047	EMC	Y	N	N	N	Alabama - Coosa	FEMA	Ecological	Enviromental	Wildfire	November
24	C01047	Alabama	AL	01	Dallas	County	01047	EMC	Y	N	N	N	Alabama - Coosa	FEMA	Ecological	Enviromental	Wildfire	September
24	C01047	Alabama	AL	01	Dallas	County	01047	EMC	Y	N	N	N	Alabama - Coosa	FEMA	Ecological	Enviromental	Wildfire	April
24	C01047	Alabama	AL	01	Dallas	County	01047	EMC	Y	N	N	N	Alabama - Coosa	FEMA	Ecological	Enviromental	Wildfire	October
26	C01051	Alabama	AL	01	Elmore	County	01051	EMC	Y	N	N	N	Alabama - Coosa	FEMA	Metrological	Enviromental	Cold Wave	November
26	C01051	Alabama	AL	01	Elmore	County	01051	EMC	Y	N	N	N	Alabama - Coosa	FEMA	Metrological	Enviromental	Cold Wave	December
26	C01051	Alabama	AL	01	Elmore	County	01051	EMC	Y	N	N	N	Alabama - Coosa	FEMA	Metrological	Enviromental	Cold Wave	January
26	C01051	Alabama	AL	01	Elmore	County	01051	EMC	Y	N	N	N	Alabama - Coosa	FEMA	Metrological	Enviromental	Cold Wave	February
26	C01051	Alabama	AL	01	Elmore	County	01051	EMC	Y	N	N	N	Alabama - Coosa	FEMA	Metrological	Enviromental	Winter Weather	November
26	C01051	Alabama	AL	01	Elmore	County	01051	EMC	Y	N	N	N	Alabama - Coosa	FEMA	Metrological	Enviromental	Winter Weather	December
26	C01051	Alabama	AL	01	Elmore	County	01051	EMC	Y	N	N	N	Alabama - Coosa	FEMA	Metrological	Enviromental	Winter Weather	January
26	C01051	Alabama	AL	01	Elmore	County	01051	EMC	Y	N	N	N	Alabama - Coosa	FEMA	Metrological	Enviromental	Winter Weather	February
26	C01051	Alabama	AL	01	Elmore	County	01051	EMC	Y	N	N	N	Alabama - Coosa	FEMA	Metrological	Enviromental	Winter Weather	March
26	C01051	Alabama	AL	01	Elmore	County	01051	EMC	Y	N	N	N	Alabama - Coosa	FEMA	Metrological	Enviromental	Hurricane	November
26	C01051	Alabama	AL	01	Elmore	County	01051	EMC	Y	N	N	N	Alabama - Coosa	FEMA	Metrological	Enviromental	Hurricane	June
26	C01051	Alabama	AL	01	Elmore	County	01051	EMC	Y	N	N	N	Alabama - Coosa	FEMA	Metrological	Enviromental	Hurricane	July
26	C01051	Alabama	AL	01	Elmore	County	01051	EMC	Y	N	N	N	Alabama - Coosa	FEMA	Metrological	Enviromental	Hurricane	August
26	C01051	Alabama	AL	01	Elmore	County	01051	EMC	Y	N	N	N	Alabama - Coosa	FEMA	Metrological	Enviromental	Hurricane	September
26	C01051	Alabama	AL	01	Elmore	County	01051	EMC	Y	N	N	N	Alabama - Coosa	FEMA	Metrological	Enviromental	Hurricane	October
2	C01003	Alabama	AL	01	Baldwin	County	01003	EMC	Y	Y	N	N	GIWW, Alabama - Coosa	Lit	Metrological	Enviromental	Heat Wave	June
2	C01003	Alabama	AL	01	Baldwin	County	01003	EMC	Y	Y	N	N	GIWW, Alabama - Coosa	FEMA	Metrological	Enviromental	Heat Wave	July
2	C01003	Alabama	AL	01	Baldwin	County	01003	EMC	Y	Y	N	N	GIWW, Alabama - Coosa	FEMA	Metrological	Enviromental	Heat Wave	August
2	C01003	Alabama	AL	01	Baldwin	County	01003	EMC	Y	Y	N	N	GIWW, Alabama - Coosa	FEMA	Metrological	Enviromental	Heat Wave	September
26	C01051	Alabama	AL	01	Elmore	County	01051	EMC	Y	N	N	N	Alabama - Coosa	FEMA	Metrological	Enviromental	Cold Wave	March
26	C01051	Alabama	AL	01	Elmore	County	01051	EMC	Y	N	N	N	Alabama - Coosa	FEMA	Non Seasonal	Enviromental	Volcano
26	C01051	Alabama	AL	01	Elmore	County	01051	EMC	Y	N	N	N	Alabama - Coosa	FEMA	Non Seasonal	Enviromental	Earthquake
26	C01051	Alabama	AL	01	Elmore	County	01051	EMC	Y	N	N	N	Alabama - Coosa	FEMA	Geotechnical	Enviromental	Avalanche
26	C01051	Alabama	AL	01	Elmore	County	01051	EMC	Y	N	N	N	Alabama - Coosa	FEMA	Non Seasonal	Enviromental	Tsunami
26	C01051	Alabama	AL	01	Elmore	County	01051	EMC	Y	N	N	N	Alabama - Coosa	FEMA	Metrological	Enviromental	Hail	February
26	C01051	Alabama	AL	01	Elmore	County	01051	EMC	Y	N	N	N	Alabama - Coosa	FEMA	Metrological	Enviromental	Hail	March
26	C01051	Alabama	AL	01	Elmore	County	01051	EMC	Y	N	N	N	Alabama - Coosa	FEMA	Metrological	Enviromental	Hail	April
26	C01051	Alabama	AL	01	Elmore	County	01051	EMC	Y	N	N	N	Alabama - Coosa	FEMA	Metrological	Enviromental	Hail	May
26	C01051	Alabama	AL	01	Elmore	County	01051	EMC	Y	N	N	N	Alabama - Coosa	FEMA	Metrological	Enviromental	Hail	June
26	C01051	Alabama	AL	01	Elmore	County	01051	EMC	Y	N	N	N	Alabama - Coosa	FEMA	Ecological	Enviromental	Wildfire	December
26	C01051	Alabama	AL	01	Elmore	County	01051	EMC	Y	N	N	N	Alabama - Coosa	FEMA	Ecological	Enviromental	Wildfire	February
26	C01051	Alabama	AL	01	Elmore	County	01051	EMC	Y	N	N	N	Alabama - Coosa	FEMA	Ecological	Enviromental	Wildfire	January
26	C01051	Alabama	AL	01	Elmore	County	01051	EMC	Y	N	N	N	Alabama - Coosa	FEMA	Ecological	Enviromental	Wildfire	March
26	C01051	Alabama	AL	01	Elmore	County	01051	EMC	Y	N	N	N	Alabama - Coosa	FEMA	Ecological	Enviromental	Wildfire	November
26	C01051	Alabama	AL	01	Elmore	County	01051	EMC	Y	N	N	N	Alabama - Coosa	FEMA	Ecological	Enviromental	Wildfire	September
26	C01051	Alabama	AL	01	Elmore	County	01051	EMC	Y	N	N	N	Alabama - Coosa	FEMA	Ecological	Enviromental	Wildfire	April
26	C01051	Alabama	AL	01	Elmore	County	01051	EMC	Y	N	N	N	Alabama - Coosa	FEMA	Ecological	Enviromental	Wildfire	October
43	C01085	Alabama	AL	01	Lowndes	County	01085	EMC	Y	N	N	N	Alabama - Coosa	FEMA	Metrological	Enviromental	Cold Wave	November
43	C01085	Alabama	AL	01	Lowndes	County	01085	EMC	Y	N	N	N	Alabama - Coosa	FEMA	Metrological	Enviromental	Cold Wave	December
43	C01085	Alabama	AL	01	Lowndes	County	01085	EMC	Y	N	N	N	Alabama - Coosa	FEMA	Metrological	Enviromental	Cold Wave	January
43	C01085	Alabama	AL	01	Lowndes	County	01085	EMC	Y	N	N	N	Alabama - Coosa	FEMA	Metrological	Enviromental	Cold Wave	February
43	C01085	Alabama	AL	01	Lowndes	County	01085	EMC	Y	N	N	N	Alabama - Coosa	FEMA	Metrological	Enviromental	Winter Weather	November
43	C01085	Alabama	AL	01	Lowndes	County	01085	EMC	Y	N	N	N	Alabama - Coosa	FEMA	Metrological	Enviromental	Winter Weather	December
43	C01085	Alabama	AL	01	Lowndes	County	01085	EMC	Y	N	N	N	Alabama - Coosa	FEMA	Metrological	Enviromental	Winter Weather	January
43	C01085	Alabama	AL	01	Lowndes	County	01085	EMC	Y	N	N	N	Alabama - Coosa	FEMA	Metrological	Enviromental	Winter Weather	February
43	C01085	Alabama	AL	01	Lowndes	County	01085	EMC	Y	N	N	N	Alabama - Coosa	FEMA	Metrological	Enviromental	Winter Weather	March
43	C01085	Alabama	AL	01	Lowndes	County	01085	EMC	Y	N	N	N	Alabama - Coosa	FEMA	Metrological	Enviromental	Hurricane	November
43	C01085	Alabama	AL	01	Lowndes	County	01085	EMC	Y	N	N	N	Alabama - Coosa	FEMA	Metrological	Enviromental	Hurricane	June
43	C01085	Alabama	AL	01	Lowndes	County	01085	EMC	Y	N	N	N	Alabama - Coosa	FEMA	Metrological	Enviromental	Hurricane	July
43	C01085	Alabama	AL	01	Lowndes	County	01085	EMC	Y	N	N	N	Alabama - Coosa	FEMA	Metrological	Enviromental	Hurricane	August
43	C01085	Alabama	AL	01	Lowndes	County	01085	EMC	Y	N	N	N	Alabama - Coosa	FEMA	Metrological	Enviromental	Hurricane	September
43	C01085	Alabama	AL	01	Lowndes	County	01085	EMC	Y	N	N	N	Alabama - Coosa	FEMA	Metrological	Enviromental	Hurricane	October
2	C01003	Alabama	AL	01	Baldwin	County	01003	DA	Y	Y	N	N	GIWW, Alabama - Coosa	Lit	Maritime	Equity	Recreational Boating	June
2	C01003	Alabama	AL	01	Baldwin	County	01003	DA	Y	Y	N	N	GIWW, Alabama - Coosa	Lit	Maritime	Equity	Recreational Boating	July
2	C01003	Alabama	AL	01	Baldwin	County	01003	DA	Y	Y	N	N	GIWW, Alabama - Coosa	Lit	Maritime	Equity	Recreational Boating	August
2	C01003	Alabama	AL	01	Baldwin	County	01003	DA	Y	Y	N	N	GIWW, Alabama - Coosa	Lit	Maritime	Equity	Recreational Boating	September
43	C01085	Alabama	AL	01	Lowndes	County	01085	EMC	Y	N	N	N	Alabama - Coosa	FEMA	Metrological	Enviromental	Cold Wave	March
43	C01085	Alabama	AL	01	Lowndes	County	01085	EMC	Y	N	N	N	Alabama - Coosa	FEMA	Non Seasonal	Enviromental	Volcano
43	C01085	Alabama	AL	01	Lowndes	County	01085	EMC	Y	N	N	N	Alabama - Coosa	FEMA	Non Seasonal	Enviromental	Earthquake
43	C01085	Alabama	AL	01	Lowndes	County	01085	EMC	Y	N	N	N	Alabama - Coosa	FEMA	Geotechnical	Enviromental	Avalanche
43	C01085	Alabama	AL	01	Lowndes	County	01085	EMC	Y	N	N	N	Alabama - Coosa	FEMA	Non Seasonal	Enviromental	Tsunami
43	C01085	Alabama	AL	01	Lowndes	County	01085	EMC	Y	N	N	N	Alabama - Coosa	FEMA	Metrological	Enviromental	Hail	February
43	C01085	Alabama	AL	01	Lowndes	County	01085	EMC	Y	N	N	N	Alabama - Coosa	FEMA	Metrological	Enviromental	Hail	March
43	C01085	Alabama	AL	01	Lowndes	County	01085	EMC	Y	N	N	N	Alabama - Coosa	FEMA	Metrological	Enviromental	Hail	April
43	C01085	Alabama	AL	01	Lowndes	County	01085	EMC	Y	N	N	N	Alabama - Coosa	FEMA	Metrological	Enviromental	Hail	May
43	C01085	Alabama	AL	01	Lowndes	County	01085	EMC	Y	N	N	N	Alabama - Coosa	FEMA	Metrological	Enviromental	Hail	June
43	C01085	Alabama	AL	01	Lowndes	County	01085	EMC	Y	N	N	N	Alabama - Coosa	FEMA	Ecological	Enviromental	Wildfire	December
43	C01085	Alabama	AL	01	Lowndes	County	01085	EMC	Y	N	N	N	Alabama - Coosa	FEMA	Ecological	Enviromental	Wildfire	February
43	C01085	Alabama	AL	01	Lowndes	County	01085	EMC	Y	N	N	N	Alabama - Coosa	FEMA	Ecological	Enviromental	Wildfire	January
43	C01085	Alabama	AL	01	Lowndes	County	01085	EMC	Y	N	N	N	Alabama - Coosa	FEMA	Ecological	Enviromental	Wildfire	March
43	C01085	Alabama	AL	01	Lowndes	County	01085	EMC	Y	N	N	N	Alabama - Coosa	FEMA	Ecological	Enviromental	Wildfire	November
43	C01085	Alabama	AL	01	Lowndes	County	01085	EMC	Y	N	N	N	Alabama - Coosa	FEMA	Ecological	Enviromental	Wildfire	September
43	C01085	Alabama	AL	01	Lowndes	County	01085	EMC	Y	N	N	N	Alabama - Coosa	FEMA	Ecological	Enviromental	Wildfire	April
43	C01085	Alabama	AL	01	Lowndes	County	01085	EMC	Y	N	N	N	Alabama - Coosa	FEMA	Ecological	Enviromental	Wildfire	October
50	C01099	Alabama	AL	01	Monroe	County	01099	EMC	Y	N	N	Y	Alabama - Coosa	FEMA	Metrological	Enviromental	Cold Wave	November
50	C01099	Alabama	AL	01	Monroe	County	01099	EMC	Y	N	N	Y	Alabama - Coosa	FEMA	Metrological	Enviromental	Cold Wave	December
50	C01099	Alabama	AL	01	Monroe	County	01099	EMC	Y	N	N	Y	Alabama - Coosa	FEMA	Metrological	Enviromental	Cold Wave	January
50	C01099	Alabama	AL	01	Monroe	County	01099	EMC	Y	N	N	Y	Alabama - Coosa	FEMA	Metrological	Enviromental	Cold Wave	February
50	C01099	Alabama	AL	01	Monroe	County	01099	EMC	Y	N	N	Y	Alabama - Coosa	FEMA	Metrological	Enviromental	Winter Weather	November
50	C01099	Alabama	AL	01	Monroe	County	01099	EMC	Y	N	N	Y	Alabama - Coosa	FEMA	Metrological	Enviromental	Winter Weather	December
50	C01099	Alabama	AL	01	Monroe	County	01099	EMC	Y	N	N	Y	Alabama - Coosa	FEMA	Metrological	Enviromental	Winter Weather	January
50	C01099	Alabama	AL	01	Monroe	County	01099	EMC	Y	N	N	Y	Alabama - Coosa	FEMA	Metrological	Enviromental	Winter Weather	February
50	C01099	Alabama	AL	01	Monroe	County	01099	EMC	Y	N	N	Y	Alabama - Coosa	FEMA	Metrological	Enviromental	Winter Weather	March
50	C01099	Alabama	AL	01	Monroe	County	01099	EMC	Y	N	N	Y	Alabama - Coosa	FEMA	Metrological	Enviromental	Hurricane	November
50	C01099	Alabama	AL	01	Monroe	County	01099	EMC	Y	N	N	Y	Alabama - Coosa	FEMA	Metrological	Enviromental	Hurricane	June
50	C01099	Alabama	AL	01	Monroe	County	01099	EMC	Y	N	N	Y	Alabama - Coosa	FEMA	Metrological	Enviromental	Hurricane	July
50	C01099	Alabama	AL	01	Monroe	County	01099	EMC	Y	N	N	Y	Alabama - Coosa	FEMA	Metrological	Enviromental	Hurricane	August
50	C01099	Alabama	AL	01	Monroe	County	01099	EMC	Y	N	N	Y	Alabama - Coosa	FEMA	Metrological	Enviromental	Hurricane	September
50	C01099	Alabama	AL	01	Monroe	County	01099	EMC	Y	N	N	Y	Alabama - Coosa	FEMA	Metrological	Enviromental	Hurricane	October
2	C01003	Alabama	AL	01	Baldwin	County	01003	DA	Y	Y	N	N	GIWW, Alabama - Coosa	Lit	Maritime	Equity	Recreational Boating	May
3	C01005	Alabama	AL	01	Barbour	County	01005	EMC	Y	N	N	N		Lit	Metrological	Enviromental	Heat Wave	June
3	C01005	Alabama	AL	01	Barbour	County	01005	EMC	Y	N	N	N		FEMA	Metrological	Enviromental	Heat Wave	July
3	C01005	Alabama	AL	01	Barbour	County	01005	EMC	Y	N	N	N		FEMA	Metrological	Enviromental	Heat Wave	August
50	C01099	Alabama	AL	01	Monroe	County	01099	EMC	Y	N	N	Y	Alabama - Coosa	FEMA	Metrological	Enviromental	Cold Wave	March
50	C01099	Alabama	AL	01	Monroe	County	01099	EMC	Y	N	N	Y	Alabama - Coosa	FEMA	Non Seasonal	Enviromental	Volcano
50	C01099	Alabama	AL	01	Monroe	County	01099	EMC	Y	N	N	Y	Alabama - Coosa	FEMA	Non Seasonal	Enviromental	Earthquake
50	C01099	Alabama	AL	01	Monroe	County	01099	EMC	Y	N	N	Y	Alabama - Coosa	FEMA	Geotechnical	Enviromental	Avalanche
50	C01099	Alabama	AL	01	Monroe	County	01099	EMC	Y	N	N	Y	Alabama - Coosa	FEMA	Non Seasonal	Enviromental	Tsunami
50	C01099	Alabama	AL	01	Monroe	County	01099	EMC	Y	N	N	Y	Alabama - Coosa	FEMA	Metrological	Enviromental	Hail	February
50	C01099	Alabama	AL	01	Monroe	County	01099	EMC	Y	N	N	Y	Alabama - Coosa	FEMA	Metrological	Enviromental	Hail	March
50	C01099	Alabama	AL	01	Monroe	County	01099	EMC	Y	N	N	Y	Alabama - Coosa	FEMA	Metrological	Enviromental	Hail	April
50	C01099	Alabama	AL	01	Monroe	County	01099	EMC	Y	N	N	Y	Alabama - Coosa	FEMA	Metrological	Enviromental	Hail	May
50	C01099	Alabama	AL	01	Monroe	County	01099	EMC	Y	N	N	Y	Alabama - Coosa	FEMA	Metrological	Enviromental	Hail	June
50	C01099	Alabama	AL	01	Monroe	County	01099	EMC	Y	N	N	Y	Alabama - Coosa	FEMA	Ecological	Enviromental	Wildfire	December
50	C01099	Alabama	AL	01	Monroe	County	01099	EMC	Y	N	N	Y	Alabama - Coosa	FEMA	Ecological	Enviromental	Wildfire	February
50	C01099	Alabama	AL	01	Monroe	County	01099	EMC	Y	N	N	Y	Alabama - Coosa	FEMA	Ecological	Enviromental	Wildfire	January
50	C01099	Alabama	AL	01	Monroe	County	01099	EMC	Y	N	N	Y	Alabama - Coosa	FEMA	Ecological	Enviromental	Wildfire	March
50	C01099	Alabama	AL	01	Monroe	County	01099	EMC	Y	N	N	Y	Alabama - Coosa	FEMA	Ecological	Enviromental	Wildfire	November
50	C01099	Alabama	AL	01	Monroe	County	01099	EMC	Y	N	N	Y	Alabama - Coosa	FEMA	Ecological	Enviromental	Wildfire	September
50	C01099	Alabama	AL	01	Monroe	County	01099	EMC	Y	N	N	Y	Alabama - Coosa	FEMA	Ecological	Enviromental	Wildfire	April
50	C01099	Alabama	AL	01	Monroe	County	01099	EMC	Y	N	N	Y	Alabama - Coosa	FEMA	Ecological	Enviromental	Wildfire	October
51	C01101	Alabama	AL	01	Montgomery	County	01101	EMC	Y	N	N	N	Alabama - Coosa	FEMA	Metrological	Enviromental	Cold Wave	November
51	C01101	Alabama	AL	01	Montgomery	County	01101	EMC	Y	N	N	N	Alabama - Coosa	FEMA	Metrological	Enviromental	Cold Wave	December
51	C01101	Alabama	AL	01	Montgomery	County	01101	EMC	Y	N	N	N	Alabama - Coosa	FEMA	Metrological	Enviromental	Cold Wave	January
51	C01101	Alabama	AL	01	Montgomery	County	01101	EMC	Y	N	N	N	Alabama - Coosa	FEMA	Metrological	Enviromental	Cold Wave	February
51	C01101	Alabama	AL	01	Montgomery	County	01101	EMC	Y	N	N	N	Alabama - Coosa	FEMA	Metrological	Enviromental	Winter Weather	November
51	C01101	Alabama	AL	01	Montgomery	County	01101	EMC	Y	N	N	N	Alabama - Coosa	FEMA	Metrological	Enviromental	Winter Weather	December
51	C01101	Alabama	AL	01	Montgomery	County	01101	EMC	Y	N	N	N	Alabama - Coosa	FEMA	Metrological	Enviromental	Winter Weather	January
51	C01101	Alabama	AL	01	Montgomery	County	01101	EMC	Y	N	N	N	Alabama - Coosa	FEMA	Metrological	Enviromental	Winter Weather	February
51	C01101	Alabama	AL	01	Montgomery	County	01101	EMC	Y	N	N	N	Alabama - Coosa	FEMA	Metrological	Enviromental	Winter Weather	March
51	C01101	Alabama	AL	01	Montgomery	County	01101	EMC	Y	N	N	N	Alabama - Coosa	FEMA	Metrological	Enviromental	Hurricane	November
51	C01101	Alabama	AL	01	Montgomery	County	01101	EMC	Y	N	N	N	Alabama - Coosa	FEMA	Metrological	Enviromental	Hurricane	June
51	C01101	Alabama	AL	01	Montgomery	County	01101	EMC	Y	N	N	N	Alabama - Coosa	FEMA	Metrological	Enviromental	Hurricane	July
51	C01101	Alabama	AL	01	Montgomery	County	01101	EMC	Y	N	N	N	Alabama - Coosa	FEMA	Metrological	Enviromental	Hurricane	August
51	C01101	Alabama	AL	01	Montgomery	County	01101	EMC	Y	N	N	N	Alabama - Coosa	FEMA	Metrological	Enviromental	Hurricane	September
51	C01101	Alabama	AL	01	Montgomery	County	01101	EMC	Y	N	N	N	Alabama - Coosa	FEMA	Metrological	Enviromental	Hurricane	October
3	C01005	Alabama	AL	01	Barbour	County	01005	EMC	Y	N	N	N		FEMA	Metrological	Enviromental	Heat Wave	September
3	C01005	Alabama	AL	01	Barbour	County	01005	DA	Y	N	N	N		Lit	Maritime	Equity	Recreational Boating	June
3	C01005	Alabama	AL	01	Barbour	County	01005	DA	Y	N	N	N		Lit	Maritime	Equity	Recreational Boating	July
3	C01005	Alabama	AL	01	Barbour	County	01005	DA	Y	N	N	N		Lit	Maritime	Equity	Recreational Boating	August
51	C01101	Alabama	AL	01	Montgomery	County	01101	EMC	Y	N	N	N	Alabama - Coosa	FEMA	Metrological	Enviromental	Cold Wave	March
51	C01101	Alabama	AL	01	Montgomery	County	01101	EMC	Y	N	N	N	Alabama - Coosa	FEMA	Non Seasonal	Enviromental	Volcano
51	C01101	Alabama	AL	01	Montgomery	County	01101	EMC	Y	N	N	N	Alabama - Coosa	FEMA	Non Seasonal	Enviromental	Earthquake
51	C01101	Alabama	AL	01	Montgomery	County	01101	EMC	Y	N	N	N	Alabama - Coosa	FEMA	Geotechnical	Enviromental	Avalanche
51	C01101	Alabama	AL	01	Montgomery	County	01101	EMC	Y	N	N	N	Alabama - Coosa	FEMA	Non Seasonal	Enviromental	Tsunami
51	C01101	Alabama	AL	01	Montgomery	County	01101	EMC	Y	N	N	N	Alabama - Coosa	FEMA	Metrological	Enviromental	Hail	February
51	C01101	Alabama	AL	01	Montgomery	County	01101	EMC	Y	N	N	N	Alabama - Coosa	FEMA	Metrological	Enviromental	Hail	March
51	C01101	Alabama	AL	01	Montgomery	County	01101	EMC	Y	N	N	N	Alabama - Coosa	FEMA	Metrological	Enviromental	Hail	April
51	C01101	Alabama	AL	01	Montgomery	County	01101	EMC	Y	N	N	N	Alabama - Coosa	FEMA	Metrological	Enviromental	Hail	May
51	C01101	Alabama	AL	01	Montgomery	County	01101	EMC	Y	N	N	N	Alabama - Coosa	FEMA	Metrological	Enviromental	Hail	June
51	C01101	Alabama	AL	01	Montgomery	County	01101	EMC	Y	N	N	N	Alabama - Coosa	FEMA	Ecological	Enviromental	Wildfire	December
51	C01101	Alabama	AL	01	Montgomery	County	01101	EMC	Y	N	N	N	Alabama - Coosa	FEMA	Ecological	Enviromental	Wildfire	February
51	C01101	Alabama	AL	01	Montgomery	County	01101	EMC	Y	N	N	N	Alabama - Coosa	FEMA	Ecological	Enviromental	Wildfire	January
51	C01101	Alabama	AL	01	Montgomery	County	01101	EMC	Y	N	N	N	Alabama - Coosa	FEMA	Ecological	Enviromental	Wildfire	March
51	C01101	Alabama	AL	01	Montgomery	County	01101	EMC	Y	N	N	N	Alabama - Coosa	FEMA	Ecological	Enviromental	Wildfire	November
51	C01101	Alabama	AL	01	Montgomery	County	01101	EMC	Y	N	N	N	Alabama - Coosa	FEMA	Ecological	Enviromental	Wildfire	September
51	C01101	Alabama	AL	01	Montgomery	County	01101	EMC	Y	N	N	N	Alabama - Coosa	FEMA	Ecological	Enviromental	Wildfire	April
51	C01101	Alabama	AL	01	Montgomery	County	01101	EMC	Y	N	N	N	Alabama - Coosa	FEMA	Ecological	Enviromental	Wildfire	October
66	C01131	Alabama	AL	01	Wilcox	County	01131	EMC	Y	N	N	Y	Alabama - Coosa	FEMA	Metrological	Enviromental	Cold Wave	November
66	C01131	Alabama	AL	01	Wilcox	County	01131	EMC	Y	N	N	Y	Alabama - Coosa	FEMA	Metrological	Enviromental	Cold Wave	December
66	C01131	Alabama	AL	01	Wilcox	County	01131	EMC	Y	N	N	Y	Alabama - Coosa	FEMA	Metrological	Enviromental	Cold Wave	January
66	C01131	Alabama	AL	01	Wilcox	County	01131	EMC	Y	N	N	Y	Alabama - Coosa	FEMA	Metrological	Enviromental	Cold Wave	February
66	C01131	Alabama	AL	01	Wilcox	County	01131	EMC	Y	N	N	Y	Alabama - Coosa	FEMA	Metrological	Enviromental	Winter Weather	November
66	C01131	Alabama	AL	01	Wilcox	County	01131	EMC	Y	N	N	Y	Alabama - Coosa	FEMA	Metrological	Enviromental	Winter Weather	December
66	C01131	Alabama	AL	01	Wilcox	County	01131	EMC	Y	N	N	Y	Alabama - Coosa	FEMA	Metrological	Enviromental	Winter Weather	January
66	C01131	Alabama	AL	01	Wilcox	County	01131	EMC	Y	N	N	Y	Alabama - Coosa	FEMA	Metrological	Enviromental	Winter Weather	February
66	C01131	Alabama	AL	01	Wilcox	County	01131	EMC	Y	N	N	Y	Alabama - Coosa	FEMA	Metrological	Enviromental	Winter Weather	March
66	C01131	Alabama	AL	01	Wilcox	County	01131	EMC	Y	N	N	Y	Alabama - Coosa	FEMA	Metrological	Enviromental	Hurricane	November
66	C01131	Alabama	AL	01	Wilcox	County	01131	EMC	Y	N	N	Y	Alabama - Coosa	FEMA	Metrological	Enviromental	Hurricane	June
66	C01131	Alabama	AL	01	Wilcox	County	01131	EMC	Y	N	N	Y	Alabama - Coosa	FEMA	Metrological	Enviromental	Hurricane	July
66	C01131	Alabama	AL	01	Wilcox	County	01131	EMC	Y	N	N	Y	Alabama - Coosa	FEMA	Metrological	Enviromental	Hurricane	August
66	C01131	Alabama	AL	01	Wilcox	County	01131	EMC	Y	N	N	Y	Alabama - Coosa	FEMA	Metrological	Enviromental	Hurricane	September
66	C01131	Alabama	AL	01	Wilcox	County	01131	EMC	Y	N	N	Y	Alabama - Coosa	FEMA	Metrological	Enviromental	Hurricane	October
3	C01005	Alabama	AL	01	Barbour	County	01005	DA	Y	N	N	N		Lit	Maritime	Equity	Recreational Boating	September
3	C01005	Alabama	AL	01	Barbour	County	01005	DA	Y	N	N	N		Lit	Maritime	Equity	Recreational Boating	May
4	C01007	Alabama	AL	01	Bibb	County	01007	EMC	N	N	N	N		FEMA	Metrological	Enviromental	Heat Wave	June
4	C01007	Alabama	AL	01	Bibb	County	01007	EMC	N	N	N	N		FEMA	Metrological	Enviromental	Heat Wave	July
66	C01131	Alabama	AL	01	Wilcox	County	01131	EMC	Y	N	N	Y	Alabama - Coosa	FEMA	Metrological	Enviromental	Cold Wave	March
66	C01131	Alabama	AL	01	Wilcox	County	01131	EMC	Y	N	N	Y	Alabama - Coosa	FEMA	Non Seasonal	Enviromental	Volcano
66	C01131	Alabama	AL	01	Wilcox	County	01131	EMC	Y	N	N	Y	Alabama - Coosa	FEMA	Non Seasonal	Enviromental	Earthquake
66	C01131	Alabama	AL	01	Wilcox	County	01131	EMC	Y	N	N	Y	Alabama - Coosa	FEMA	Geotechnical	Enviromental	Avalanche
66	C01131	Alabama	AL	01	Wilcox	County	01131	EMC	Y	N	N	Y	Alabama - Coosa	FEMA	Non Seasonal	Enviromental	Tsunami
66	C01131	Alabama	AL	01	Wilcox	County	01131	EMC	Y	N	N	Y	Alabama - Coosa	FEMA	Metrological	Enviromental	Hail	February
66	C01131	Alabama	AL	01	Wilcox	County	01131	EMC	Y	N	N	Y	Alabama - Coosa	FEMA	Metrological	Enviromental	Hail	March
66	C01131	Alabama	AL	01	Wilcox	County	01131	EMC	Y	N	N	Y	Alabama - Coosa	FEMA	Metrological	Enviromental	Hail	April
66	C01131	Alabama	AL	01	Wilcox	County	01131	EMC	Y	N	N	Y	Alabama - Coosa	FEMA	Metrological	Enviromental	Hail	May
66	C01131	Alabama	AL	01	Wilcox	County	01131	EMC	Y	N	N	Y	Alabama - Coosa	FEMA	Metrological	Enviromental	Hail	June
66	C01131	Alabama	AL	01	Wilcox	County	01131	EMC	Y	N	N	Y	Alabama - Coosa	FEMA	Ecological	Enviromental	Wildfire	December
66	C01131	Alabama	AL	01	Wilcox	County	01131	EMC	Y	N	N	Y	Alabama - Coosa	FEMA	Ecological	Enviromental	Wildfire	February
66	C01131	Alabama	AL	01	Wilcox	County	01131	EMC	Y	N	N	Y	Alabama - Coosa	FEMA	Ecological	Enviromental	Wildfire	January
66	C01131	Alabama	AL	01	Wilcox	County	01131	EMC	Y	N	N	Y	Alabama - Coosa	FEMA	Ecological	Enviromental	Wildfire	March
66	C01131	Alabama	AL	01	Wilcox	County	01131	EMC	Y	N	N	Y	Alabama - Coosa	FEMA	Ecological	Enviromental	Wildfire	November
66	C01131	Alabama	AL	01	Wilcox	County	01131	EMC	Y	N	N	Y	Alabama - Coosa	FEMA	Ecological	Enviromental	Wildfire	September
66	C01131	Alabama	AL	01	Wilcox	County	01131	EMC	Y	N	N	Y	Alabama - Coosa	FEMA	Ecological	Enviromental	Wildfire	April
66	C01131	Alabama	AL	01	Wilcox	County	01131	EMC	Y	N	N	Y	Alabama - Coosa	FEMA	Ecological	Enviromental	Wildfire	October
13	C01025	Alabama	AL	01	Clarke	County	01025	EMC	Y	N	N	N	Alabama - Coosa, Black Warrior-Tombigbee	FEMA	Metrological	Enviromental	Cold Wave	November
13	C01025	Alabama	AL	01	Clarke	County	01025	EMC	Y	N	N	N	Alabama - Coosa, Black Warrior-Tombigbee	FEMA	Metrological	Enviromental	Cold Wave	December
13	C01025	Alabama	AL	01	Clarke	County	01025	EMC	Y	N	N	N	Alabama - Coosa, Black Warrior-Tombigbee	FEMA	Metrological	Enviromental	Cold Wave	January
13	C01025	Alabama	AL	01	Clarke	County	01025	EMC	Y	N	N	N	Alabama - Coosa, Black Warrior-Tombigbee	FEMA	Metrological	Enviromental	Cold Wave	February
13	C01025	Alabama	AL	01	Clarke	County	01025	EMC	Y	N	N	N	Alabama - Coosa, Black Warrior-Tombigbee	FEMA	Metrological	Enviromental	Winter Weather	November
13	C01025	Alabama	AL	01	Clarke	County	01025	EMC	Y	N	N	N	Alabama - Coosa, Black Warrior-Tombigbee	FEMA	Metrological	Enviromental	Winter Weather	December
13	C01025	Alabama	AL	01	Clarke	County	01025	EMC	Y	N	N	N	Alabama - Coosa, Black Warrior-Tombigbee	FEMA	Metrological	Enviromental	Winter Weather	January
13	C01025	Alabama	AL	01	Clarke	County	01025	EMC	Y	N	N	N	Alabama - Coosa, Black Warrior-Tombigbee	FEMA	Metrological	Enviromental	Winter Weather	February
13	C01025	Alabama	AL	01	Clarke	County	01025	EMC	Y	N	N	N	Alabama - Coosa, Black Warrior-Tombigbee	FEMA	Metrological	Enviromental	Winter Weather	March
13	C01025	Alabama	AL	01	Clarke	County	01025	EMC	Y	N	N	N	Alabama - Coosa, Black Warrior-Tombigbee	FEMA	Metrological	Enviromental	Hurricane	November
13	C01025	Alabama	AL	01	Clarke	County	01025	EMC	Y	N	N	N	Alabama - Coosa, Black Warrior-Tombigbee	FEMA	Metrological	Enviromental	Hurricane	June
13	C01025	Alabama	AL	01	Clarke	County	01025	EMC	Y	N	N	N	Alabama - Coosa, Black Warrior-Tombigbee	FEMA	Metrological	Enviromental	Hurricane	July
13	C01025	Alabama	AL	01	Clarke	County	01025	EMC	Y	N	N	N	Alabama - Coosa, Black Warrior-Tombigbee	FEMA	Metrological	Enviromental	Hurricane	August
13	C01025	Alabama	AL	01	Clarke	County	01025	EMC	Y	N	N	N	Alabama - Coosa, Black Warrior-Tombigbee	FEMA	Metrological	Enviromental	Hurricane	September
13	C01025	Alabama	AL	01	Clarke	County	01025	EMC	Y	N	N	N	Alabama - Coosa, Black Warrior-Tombigbee	FEMA	Metrological	Enviromental	Hurricane	October
4	C01007	Alabama	AL	01	Bibb	County	01007	EMC	N	N	N	N		FEMA	Metrological	Enviromental	Heat Wave	August
4	C01007	Alabama	AL	01	Bibb	County	01007	EMC	N	N	N	N		FEMA	Metrological	Enviromental	Heat Wave	September
5	C01009	Alabama	AL	01	Blount	County	01009	EMC	N	N	N	N		FEMA	Metrological	Enviromental	Heat Wave	June
5	C01009	Alabama	AL	01	Blount	County	01009	EMC	N	N	N	N		FEMA	Metrological	Enviromental	Heat Wave	July
13	C01025	Alabama	AL	01	Clarke	County	01025	EMC	Y	N	N	N	Alabama - Coosa, Black Warrior-Tombigbee	FEMA	Metrological	Enviromental	Cold Wave	March
13	C01025	Alabama	AL	01	Clarke	County	01025	EMC	Y	N	N	N	Alabama - Coosa, Black Warrior-Tombigbee	FEMA	Non Seasonal	Enviromental	Volcano
13	C01025	Alabama	AL	01	Clarke	County	01025	EMC	Y	N	N	N	Alabama - Coosa, Black Warrior-Tombigbee	FEMA	Non Seasonal	Enviromental	Earthquake
13	C01025	Alabama	AL	01	Clarke	County	01025	EMC	Y	N	N	N	Alabama - Coosa, Black Warrior-Tombigbee	FEMA	Geotechnical	Enviromental	Avalanche
13	C01025	Alabama	AL	01	Clarke	County	01025	EMC	Y	N	N	N	Alabama - Coosa, Black Warrior-Tombigbee	FEMA	Non Seasonal	Enviromental	Tsunami
13	C01025	Alabama	AL	01	Clarke	County	01025	EMC	Y	N	N	N	Alabama - Coosa, Black Warrior-Tombigbee	FEMA	Metrological	Enviromental	Hail	February
13	C01025	Alabama	AL	01	Clarke	County	01025	EMC	Y	N	N	N	Alabama - Coosa, Black Warrior-Tombigbee	FEMA	Metrological	Enviromental	Hail	March
13	C01025	Alabama	AL	01	Clarke	County	01025	EMC	Y	N	N	N	Alabama - Coosa, Black Warrior-Tombigbee	FEMA	Metrological	Enviromental	Hail	April
13	C01025	Alabama	AL	01	Clarke	County	01025	EMC	Y	N	N	N	Alabama - Coosa, Black Warrior-Tombigbee	FEMA	Metrological	Enviromental	Hail	May
13	C01025	Alabama	AL	01	Clarke	County	01025	EMC	Y	N	N	N	Alabama - Coosa, Black Warrior-Tombigbee	FEMA	Metrological	Enviromental	Hail	June
13	C01025	Alabama	AL	01	Clarke	County	01025	EMC	Y	N	N	N	Alabama - Coosa, Black Warrior-Tombigbee	FEMA	Ecological	Enviromental	Wildfire	December
13	C01025	Alabama	AL	01	Clarke	County	01025	EMC	Y	N	N	N	Alabama - Coosa, Black Warrior-Tombigbee	FEMA	Ecological	Enviromental	Wildfire	February
13	C01025	Alabama	AL	01	Clarke	County	01025	EMC	Y	N	N	N	Alabama - Coosa, Black Warrior-Tombigbee	FEMA	Ecological	Enviromental	Wildfire	January
13	C01025	Alabama	AL	01	Clarke	County	01025	EMC	Y	N	N	N	Alabama - Coosa, Black Warrior-Tombigbee	FEMA	Ecological	Enviromental	Wildfire	March
13	C01025	Alabama	AL	01	Clarke	County	01025	EMC	Y	N	N	N	Alabama - Coosa, Black Warrior-Tombigbee	FEMA	Ecological	Enviromental	Wildfire	November
13	C01025	Alabama	AL	01	Clarke	County	01025	EMC	Y	N	N	N	Alabama - Coosa, Black Warrior-Tombigbee	FEMA	Ecological	Enviromental	Wildfire	September
13	C01025	Alabama	AL	01	Clarke	County	01025	EMC	Y	N	N	N	Alabama - Coosa, Black Warrior-Tombigbee	FEMA	Ecological	Enviromental	Wildfire	April
13	C01025	Alabama	AL	01	Clarke	County	01025	EMC	Y	N	N	N	Alabama - Coosa, Black Warrior-Tombigbee	FEMA	Ecological	Enviromental	Wildfire	October
1163	C22097	Louisiana	LA	22	St. Landry	Parish	22097	EMC	Y	N	N	N	Bayou Teche	FEMA	Metrological	Enviromental	Cold Wave	November
1163	C22097	Louisiana	LA	22	St. Landry	Parish	22097	EMC	Y	N	N	N	Bayou Teche	FEMA	Metrological	Enviromental	Cold Wave	December
1163	C22097	Louisiana	LA	22	St. Landry	Parish	22097	EMC	Y	N	N	N	Bayou Teche	FEMA	Metrological	Enviromental	Cold Wave	January
1163	C22097	Louisiana	LA	22	St. Landry	Parish	22097	EMC	Y	N	N	N	Bayou Teche	FEMA	Metrological	Enviromental	Cold Wave	February
1163	C22097	Louisiana	LA	22	St. Landry	Parish	22097	EMC	Y	N	N	N	Bayou Teche	FEMA	Metrological	Enviromental	Winter Weather	November
1163	C22097	Louisiana	LA	22	St. Landry	Parish	22097	EMC	Y	N	N	N	Bayou Teche	FEMA	Metrological	Enviromental	Winter Weather	December
1163	C22097	Louisiana	LA	22	St. Landry	Parish	22097	EMC	Y	N	N	N	Bayou Teche	FEMA	Metrological	Enviromental	Winter Weather	January
1163	C22097	Louisiana	LA	22	St. Landry	Parish	22097	EMC	Y	N	N	N	Bayou Teche	FEMA	Metrological	Enviromental	Winter Weather	February
1163	C22097	Louisiana	LA	22	St. Landry	Parish	22097	EMC	Y	N	N	N	Bayou Teche	FEMA	Metrological	Enviromental	Winter Weather	March
1163	C22097	Louisiana	LA	22	St. Landry	Parish	22097	EMC	Y	N	N	N	Bayou Teche	FEMA	Metrological	Enviromental	Hurricane	November
1163	C22097	Louisiana	LA	22	St. Landry	Parish	22097	EMC	Y	N	N	N	Bayou Teche	FEMA	Metrological	Enviromental	Hurricane	June
1163	C22097	Louisiana	LA	22	St. Landry	Parish	22097	EMC	Y	N	N	N	Bayou Teche	FEMA	Metrological	Enviromental	Hurricane	July
1163	C22097	Louisiana	LA	22	St. Landry	Parish	22097	EMC	Y	N	N	N	Bayou Teche	FEMA	Metrological	Enviromental	Hurricane	August
1163	C22097	Louisiana	LA	22	St. Landry	Parish	22097	EMC	Y	N	N	N	Bayou Teche	FEMA	Metrological	Enviromental	Hurricane	September
1163	C22097	Louisiana	LA	22	St. Landry	Parish	22097	EMC	Y	N	N	N	Bayou Teche	FEMA	Metrological	Enviromental	Hurricane	October
5	C01009	Alabama	AL	01	Blount	County	01009	EMC	N	N	N	N		FEMA	Metrological	Enviromental	Heat Wave	August
5	C01009	Alabama	AL	01	Blount	County	01009	EMC	N	N	N	N		FEMA	Metrological	Enviromental	Heat Wave	September
6	C01011	Alabama	AL	01	Bullock	County	01011	EMC	N	N	N	N		FEMA	Metrological	Enviromental	Heat Wave	June
6	C01011	Alabama	AL	01	Bullock	County	01011	EMC	N	N	N	N		FEMA	Metrological	Enviromental	Heat Wave	July
1163	C22097	Louisiana	LA	22	St. Landry	Parish	22097	DA	Y	N	N	N	Bayou Teche	Lit	Cultural	Equity	Mardi Gras	February
1163	C22097	Louisiana	LA	22	St. Landry	Parish	22097	EMC	Y	N	N	N	Bayou Teche	FEMA	Metrological	Enviromental	Cold Wave	March
1163	C22097	Louisiana	LA	22	St. Landry	Parish	22097	EMC	Y	N	N	N	Bayou Teche	FEMA	Non Seasonal	Enviromental	Volcano
1163	C22097	Louisiana	LA	22	St. Landry	Parish	22097	EMC	Y	N	N	N	Bayou Teche	FEMA	Non Seasonal	Enviromental	Earthquake
1163	C22097	Louisiana	LA	22	St. Landry	Parish	22097	EMC	Y	N	N	N	Bayou Teche	FEMA	Geotechnical	Enviromental	Avalanche
1163	C22097	Louisiana	LA	22	St. Landry	Parish	22097	EMC	Y	N	N	N	Bayou Teche	FEMA	Non Seasonal	Enviromental	Tsunami
1163	C22097	Louisiana	LA	22	St. Landry	Parish	22097	EMC	Y	N	N	N	Bayou Teche	FEMA	Metrological	Enviromental	Hail	February
1163	C22097	Louisiana	LA	22	St. Landry	Parish	22097	EMC	Y	N	N	N	Bayou Teche	FEMA	Metrological	Enviromental	Hail	March
1163	C22097	Louisiana	LA	22	St. Landry	Parish	22097	EMC	Y	N	N	N	Bayou Teche	FEMA	Metrological	Enviromental	Hail	April
1163	C22097	Louisiana	LA	22	St. Landry	Parish	22097	EMC	Y	N	N	N	Bayou Teche	FEMA	Metrological	Enviromental	Hail	May
1163	C22097	Louisiana	LA	22	St. Landry	Parish	22097	EMC	Y	N	N	N	Bayou Teche	FEMA	Metrological	Enviromental	Hail	June
1163	C22097	Louisiana	LA	22	St. Landry	Parish	22097	EMC	Y	N	N	N	Bayou Teche	FEMA	Ecological	Enviromental	Wildfire	December
1163	C22097	Louisiana	LA	22	St. Landry	Parish	22097	EMC	Y	N	N	N	Bayou Teche	FEMA	Ecological	Enviromental	Wildfire	February
1163	C22097	Louisiana	LA	22	St. Landry	Parish	22097	EMC	Y	N	N	N	Bayou Teche	FEMA	Ecological	Enviromental	Wildfire	January
1163	C22097	Louisiana	LA	22	St. Landry	Parish	22097	EMC	Y	N	N	N	Bayou Teche	FEMA	Ecological	Enviromental	Wildfire	March
1163	C22097	Louisiana	LA	22	St. Landry	Parish	22097	EMC	Y	N	N	N	Bayou Teche	FEMA	Ecological	Enviromental	Wildfire	November
1163	C22097	Louisiana	LA	22	St. Landry	Parish	22097	EMC	Y	N	N	N	Bayou Teche	FEMA	Ecological	Enviromental	Wildfire	September
1163	C22097	Louisiana	LA	22	St. Landry	Parish	22097	EMC	Y	N	N	N	Bayou Teche	FEMA	Ecological	Enviromental	Wildfire	April
1163	C22097	Louisiana	LA	22	St. Landry	Parish	22097	EMC	Y	N	N	N	Bayou Teche	FEMA	Ecological	Enviromental	Wildfire	October
12	C01023	Alabama	AL	01	Choctaw	County	01023	EMC	Y	N	N	N	Black Warrior-Tombigbee	FEMA	Metrological	Enviromental	Cold Wave	November
12	C01023	Alabama	AL	01	Choctaw	County	01023	EMC	Y	N	N	N	Black Warrior-Tombigbee	FEMA	Metrological	Enviromental	Cold Wave	December
12	C01023	Alabama	AL	01	Choctaw	County	01023	EMC	Y	N	N	N	Black Warrior-Tombigbee	FEMA	Metrological	Enviromental	Cold Wave	January
12	C01023	Alabama	AL	01	Choctaw	County	01023	EMC	Y	N	N	N	Black Warrior-Tombigbee	FEMA	Metrological	Enviromental	Cold Wave	February
12	C01023	Alabama	AL	01	Choctaw	County	01023	EMC	Y	N	N	N	Black Warrior-Tombigbee	FEMA	Metrological	Enviromental	Winter Weather	November
12	C01023	Alabama	AL	01	Choctaw	County	01023	EMC	Y	N	N	N	Black Warrior-Tombigbee	FEMA	Metrological	Enviromental	Winter Weather	December
12	C01023	Alabama	AL	01	Choctaw	County	01023	EMC	Y	N	N	N	Black Warrior-Tombigbee	FEMA	Metrological	Enviromental	Winter Weather	January
12	C01023	Alabama	AL	01	Choctaw	County	01023	EMC	Y	N	N	N	Black Warrior-Tombigbee	FEMA	Metrological	Enviromental	Winter Weather	February
12	C01023	Alabama	AL	01	Choctaw	County	01023	EMC	Y	N	N	N	Black Warrior-Tombigbee	FEMA	Metrological	Enviromental	Winter Weather	March
12	C01023	Alabama	AL	01	Choctaw	County	01023	EMC	Y	N	N	N	Black Warrior-Tombigbee	FEMA	Metrological	Enviromental	Hurricane	November
12	C01023	Alabama	AL	01	Choctaw	County	01023	EMC	Y	N	N	N	Black Warrior-Tombigbee	FEMA	Metrological	Enviromental	Hurricane	June
12	C01023	Alabama	AL	01	Choctaw	County	01023	EMC	Y	N	N	N	Black Warrior-Tombigbee	FEMA	Metrological	Enviromental	Hurricane	July
12	C01023	Alabama	AL	01	Choctaw	County	01023	EMC	Y	N	N	N	Black Warrior-Tombigbee	FEMA	Metrological	Enviromental	Hurricane	August
12	C01023	Alabama	AL	01	Choctaw	County	01023	EMC	Y	N	N	N	Black Warrior-Tombigbee	FEMA	Metrological	Enviromental	Hurricane	September
12	C01023	Alabama	AL	01	Choctaw	County	01023	EMC	Y	N	N	N	Black Warrior-Tombigbee	FEMA	Metrological	Enviromental	Hurricane	October
6	C01011	Alabama	AL	01	Bullock	County	01011	EMC	N	N	N	N		FEMA	Metrological	Enviromental	Heat Wave	August
6	C01011	Alabama	AL	01	Bullock	County	01011	EMC	N	N	N	N		FEMA	Metrological	Enviromental	Heat Wave	September
7	C01013	Alabama	AL	01	Butler	County	01013	EMC	N	N	N	N		FEMA	Metrological	Enviromental	Heat Wave	June
7	C01013	Alabama	AL	01	Butler	County	01013	EMC	N	N	N	N		FEMA	Metrological	Enviromental	Heat Wave	July
12	C01023	Alabama	AL	01	Choctaw	County	01023	EMC	Y	N	N	N	Black Warrior-Tombigbee	FEMA	Metrological	Enviromental	Cold Wave	March
12	C01023	Alabama	AL	01	Choctaw	County	01023	EMC	Y	N	N	N	Black Warrior-Tombigbee	FEMA	Non Seasonal	Enviromental	Volcano
12	C01023	Alabama	AL	01	Choctaw	County	01023	EMC	Y	N	N	N	Black Warrior-Tombigbee	FEMA	Non Seasonal	Enviromental	Earthquake
12	C01023	Alabama	AL	01	Choctaw	County	01023	EMC	Y	N	N	N	Black Warrior-Tombigbee	FEMA	Geotechnical	Enviromental	Avalanche
12	C01023	Alabama	AL	01	Choctaw	County	01023	EMC	Y	N	N	N	Black Warrior-Tombigbee	FEMA	Non Seasonal	Enviromental	Tsunami
12	C01023	Alabama	AL	01	Choctaw	County	01023	EMC	Y	N	N	N	Black Warrior-Tombigbee	FEMA	Metrological	Enviromental	Hail	February
12	C01023	Alabama	AL	01	Choctaw	County	01023	EMC	Y	N	N	N	Black Warrior-Tombigbee	FEMA	Metrological	Enviromental	Hail	March
12	C01023	Alabama	AL	01	Choctaw	County	01023	EMC	Y	N	N	N	Black Warrior-Tombigbee	FEMA	Metrological	Enviromental	Hail	April
12	C01023	Alabama	AL	01	Choctaw	County	01023	EMC	Y	N	N	N	Black Warrior-Tombigbee	FEMA	Metrological	Enviromental	Hail	May
12	C01023	Alabama	AL	01	Choctaw	County	01023	EMC	Y	N	N	N	Black Warrior-Tombigbee	FEMA	Metrological	Enviromental	Hail	June
12	C01023	Alabama	AL	01	Choctaw	County	01023	EMC	Y	N	N	N	Black Warrior-Tombigbee	FEMA	Ecological	Enviromental	Wildfire	December
12	C01023	Alabama	AL	01	Choctaw	County	01023	EMC	Y	N	N	N	Black Warrior-Tombigbee	FEMA	Ecological	Enviromental	Wildfire	February
12	C01023	Alabama	AL	01	Choctaw	County	01023	EMC	Y	N	N	N	Black Warrior-Tombigbee	FEMA	Ecological	Enviromental	Wildfire	January
12	C01023	Alabama	AL	01	Choctaw	County	01023	EMC	Y	N	N	N	Black Warrior-Tombigbee	FEMA	Ecological	Enviromental	Wildfire	March
12	C01023	Alabama	AL	01	Choctaw	County	01023	EMC	Y	N	N	N	Black Warrior-Tombigbee	FEMA	Ecological	Enviromental	Wildfire	November
12	C01023	Alabama	AL	01	Choctaw	County	01023	EMC	Y	N	N	N	Black Warrior-Tombigbee	FEMA	Ecological	Enviromental	Wildfire	September
12	C01023	Alabama	AL	01	Choctaw	County	01023	EMC	Y	N	N	N	Black Warrior-Tombigbee	FEMA	Ecological	Enviromental	Wildfire	April
12	C01023	Alabama	AL	01	Choctaw	County	01023	EMC	Y	N	N	N	Black Warrior-Tombigbee	FEMA	Ecological	Enviromental	Wildfire	October
33	C01065	Alabama	AL	01	Hale	County	01065	EMC	Y	N	N	N	Black Warrior-Tombigbee	FEMA	Metrological	Enviromental	Cold Wave	November
33	C01065	Alabama	AL	01	Hale	County	01065	EMC	Y	N	N	N	Black Warrior-Tombigbee	FEMA	Metrological	Enviromental	Cold Wave	December
33	C01065	Alabama	AL	01	Hale	County	01065	EMC	Y	N	N	N	Black Warrior-Tombigbee	FEMA	Metrological	Enviromental	Cold Wave	January
33	C01065	Alabama	AL	01	Hale	County	01065	EMC	Y	N	N	N	Black Warrior-Tombigbee	FEMA	Metrological	Enviromental	Cold Wave	February
33	C01065	Alabama	AL	01	Hale	County	01065	EMC	Y	N	N	N	Black Warrior-Tombigbee	FEMA	Metrological	Enviromental	Winter Weather	November
33	C01065	Alabama	AL	01	Hale	County	01065	EMC	Y	N	N	N	Black Warrior-Tombigbee	FEMA	Metrological	Enviromental	Winter Weather	December
33	C01065	Alabama	AL	01	Hale	County	01065	EMC	Y	N	N	N	Black Warrior-Tombigbee	FEMA	Metrological	Enviromental	Winter Weather	January
33	C01065	Alabama	AL	01	Hale	County	01065	EMC	Y	N	N	N	Black Warrior-Tombigbee	FEMA	Metrological	Enviromental	Winter Weather	February
33	C01065	Alabama	AL	01	Hale	County	01065	EMC	Y	N	N	N	Black Warrior-Tombigbee	FEMA	Metrological	Enviromental	Winter Weather	March
33	C01065	Alabama	AL	01	Hale	County	01065	EMC	Y	N	N	N	Black Warrior-Tombigbee	FEMA	Metrological	Enviromental	Hurricane	November
33	C01065	Alabama	AL	01	Hale	County	01065	EMC	Y	N	N	N	Black Warrior-Tombigbee	FEMA	Metrological	Enviromental	Hurricane	June
33	C01065	Alabama	AL	01	Hale	County	01065	EMC	Y	N	N	N	Black Warrior-Tombigbee	FEMA	Metrological	Enviromental	Hurricane	July
33	C01065	Alabama	AL	01	Hale	County	01065	EMC	Y	N	N	N	Black Warrior-Tombigbee	FEMA	Metrological	Enviromental	Hurricane	August
33	C01065	Alabama	AL	01	Hale	County	01065	EMC	Y	N	N	N	Black Warrior-Tombigbee	FEMA	Metrological	Enviromental	Hurricane	September
33	C01065	Alabama	AL	01	Hale	County	01065	EMC	Y	N	N	N	Black Warrior-Tombigbee	FEMA	Metrological	Enviromental	Hurricane	October
7	C01013	Alabama	AL	01	Butler	County	01013	EMC	N	N	N	N		FEMA	Metrological	Enviromental	Heat Wave	August
7	C01013	Alabama	AL	01	Butler	County	01013	EMC	N	N	N	N		FEMA	Metrological	Enviromental	Heat Wave	September
8	C01015	Alabama	AL	01	Calhoun	County	01015	EMC	N	N	N	N		FEMA	Metrological	Enviromental	Heat Wave	June
8	C01015	Alabama	AL	01	Calhoun	County	01015	EMC	N	N	N	N		FEMA	Metrological	Enviromental	Heat Wave	July
33	C01065	Alabama	AL	01	Hale	County	01065	EMC	Y	N	N	N	Black Warrior-Tombigbee	FEMA	Metrological	Enviromental	Cold Wave	March
33	C01065	Alabama	AL	01	Hale	County	01065	EMC	Y	N	N	N	Black Warrior-Tombigbee	FEMA	Non Seasonal	Enviromental	Volcano
33	C01065	Alabama	AL	01	Hale	County	01065	EMC	Y	N	N	N	Black Warrior-Tombigbee	FEMA	Non Seasonal	Enviromental	Earthquake
33	C01065	Alabama	AL	01	Hale	County	01065	EMC	Y	N	N	N	Black Warrior-Tombigbee	FEMA	Geotechnical	Enviromental	Avalanche
33	C01065	Alabama	AL	01	Hale	County	01065	EMC	Y	N	N	N	Black Warrior-Tombigbee	FEMA	Non Seasonal	Enviromental	Tsunami
33	C01065	Alabama	AL	01	Hale	County	01065	EMC	Y	N	N	N	Black Warrior-Tombigbee	FEMA	Metrological	Enviromental	Hail	February
33	C01065	Alabama	AL	01	Hale	County	01065	EMC	Y	N	N	N	Black Warrior-Tombigbee	FEMA	Metrological	Enviromental	Hail	March
33	C01065	Alabama	AL	01	Hale	County	01065	EMC	Y	N	N	N	Black Warrior-Tombigbee	FEMA	Metrological	Enviromental	Hail	April
33	C01065	Alabama	AL	01	Hale	County	01065	EMC	Y	N	N	N	Black Warrior-Tombigbee	FEMA	Metrological	Enviromental	Hail	May
33	C01065	Alabama	AL	01	Hale	County	01065	EMC	Y	N	N	N	Black Warrior-Tombigbee	FEMA	Metrological	Enviromental	Hail	June
33	C01065	Alabama	AL	01	Hale	County	01065	EMC	Y	N	N	N	Black Warrior-Tombigbee	FEMA	Ecological	Enviromental	Wildfire	December
33	C01065	Alabama	AL	01	Hale	County	01065	EMC	Y	N	N	N	Black Warrior-Tombigbee	FEMA	Ecological	Enviromental	Wildfire	February
33	C01065	Alabama	AL	01	Hale	County	01065	EMC	Y	N	N	N	Black Warrior-Tombigbee	FEMA	Ecological	Enviromental	Wildfire	January
33	C01065	Alabama	AL	01	Hale	County	01065	EMC	Y	N	N	N	Black Warrior-Tombigbee	FEMA	Ecological	Enviromental	Wildfire	March
33	C01065	Alabama	AL	01	Hale	County	01065	EMC	Y	N	N	N	Black Warrior-Tombigbee	FEMA	Ecological	Enviromental	Wildfire	November
33	C01065	Alabama	AL	01	Hale	County	01065	EMC	Y	N	N	N	Black Warrior-Tombigbee	FEMA	Ecological	Enviromental	Wildfire	September
33	C01065	Alabama	AL	01	Hale	County	01065	EMC	Y	N	N	N	Black Warrior-Tombigbee	FEMA	Ecological	Enviromental	Wildfire	April
33	C01065	Alabama	AL	01	Hale	County	01065	EMC	Y	N	N	N	Black Warrior-Tombigbee	FEMA	Ecological	Enviromental	Wildfire	October
37	C01073	Alabama	AL	01	Jefferson	County	01073	EMC	Y	N	Y	N	Black Warrior-Tombigbee	FEMA	Metrological	Enviromental	Cold Wave	November
37	C01073	Alabama	AL	01	Jefferson	County	01073	EMC	Y	N	Y	N	Black Warrior-Tombigbee	FEMA	Metrological	Enviromental	Cold Wave	December
37	C01073	Alabama	AL	01	Jefferson	County	01073	EMC	Y	N	Y	N	Black Warrior-Tombigbee	FEMA	Metrological	Enviromental	Cold Wave	January
37	C01073	Alabama	AL	01	Jefferson	County	01073	EMC	Y	N	Y	N	Black Warrior-Tombigbee	FEMA	Metrological	Enviromental	Cold Wave	February
37	C01073	Alabama	AL	01	Jefferson	County	01073	EMC	Y	N	Y	N	Black Warrior-Tombigbee	FEMA	Metrological	Enviromental	Winter Weather	November
37	C01073	Alabama	AL	01	Jefferson	County	01073	EMC	Y	N	Y	N	Black Warrior-Tombigbee	FEMA	Metrological	Enviromental	Winter Weather	December
37	C01073	Alabama	AL	01	Jefferson	County	01073	EMC	Y	N	Y	N	Black Warrior-Tombigbee	FEMA	Metrological	Enviromental	Winter Weather	January
37	C01073	Alabama	AL	01	Jefferson	County	01073	EMC	Y	N	Y	N	Black Warrior-Tombigbee	FEMA	Metrological	Enviromental	Winter Weather	February
37	C01073	Alabama	AL	01	Jefferson	County	01073	EMC	Y	N	Y	N	Black Warrior-Tombigbee	FEMA	Metrological	Enviromental	Winter Weather	March
37	C01073	Alabama	AL	01	Jefferson	County	01073	EMC	Y	N	Y	N	Black Warrior-Tombigbee	FEMA	Metrological	Enviromental	Hurricane	November
37	C01073	Alabama	AL	01	Jefferson	County	01073	EMC	Y	N	Y	N	Black Warrior-Tombigbee	FEMA	Metrological	Enviromental	Hurricane	June
37	C01073	Alabama	AL	01	Jefferson	County	01073	EMC	Y	N	Y	N	Black Warrior-Tombigbee	FEMA	Metrological	Enviromental	Hurricane	July
37	C01073	Alabama	AL	01	Jefferson	County	01073	EMC	Y	N	Y	N	Black Warrior-Tombigbee	FEMA	Metrological	Enviromental	Hurricane	August
37	C01073	Alabama	AL	01	Jefferson	County	01073	EMC	Y	N	Y	N	Black Warrior-Tombigbee	FEMA	Metrological	Enviromental	Hurricane	September
37	C01073	Alabama	AL	01	Jefferson	County	01073	EMC	Y	N	Y	N	Black Warrior-Tombigbee	FEMA	Metrological	Enviromental	Hurricane	October
8	C01015	Alabama	AL	01	Calhoun	County	01015	EMC	N	N	N	N		FEMA	Metrological	Enviromental	Heat Wave	August
8	C01015	Alabama	AL	01	Calhoun	County	01015	EMC	N	N	N	N		FEMA	Metrological	Enviromental	Heat Wave	September
9	C01017	Alabama	AL	01	Chambers	County	01017	EMC	N	N	N	N		FEMA	Metrological	Enviromental	Heat Wave	June
9	C01017	Alabama	AL	01	Chambers	County	01017	EMC	N	N	N	N		FEMA	Metrological	Enviromental	Heat Wave	July
37	C01073	Alabama	AL	01	Jefferson	County	01073	EMC	Y	N	Y	N	Black Warrior-Tombigbee	FEMA	Metrological	Enviromental	Cold Wave	March
37	C01073	Alabama	AL	01	Jefferson	County	01073	EMC	Y	N	Y	N	Black Warrior-Tombigbee	FEMA	Non Seasonal	Enviromental	Volcano
37	C01073	Alabama	AL	01	Jefferson	County	01073	EMC	Y	N	Y	N	Black Warrior-Tombigbee	FEMA	Non Seasonal	Enviromental	Earthquake
37	C01073	Alabama	AL	01	Jefferson	County	01073	EMC	Y	N	Y	N	Black Warrior-Tombigbee	FEMA	Geotechnical	Enviromental	Avalanche
37	C01073	Alabama	AL	01	Jefferson	County	01073	EMC	Y	N	Y	N	Black Warrior-Tombigbee	FEMA	Non Seasonal	Enviromental	Tsunami
37	C01073	Alabama	AL	01	Jefferson	County	01073	EMC	Y	N	Y	N	Black Warrior-Tombigbee	FEMA	Metrological	Enviromental	Hail	February
37	C01073	Alabama	AL	01	Jefferson	County	01073	EMC	Y	N	Y	N	Black Warrior-Tombigbee	FEMA	Metrological	Enviromental	Hail	March
37	C01073	Alabama	AL	01	Jefferson	County	01073	EMC	Y	N	Y	N	Black Warrior-Tombigbee	FEMA	Metrological	Enviromental	Hail	April
37	C01073	Alabama	AL	01	Jefferson	County	01073	EMC	Y	N	Y	N	Black Warrior-Tombigbee	FEMA	Metrological	Enviromental	Hail	May
37	C01073	Alabama	AL	01	Jefferson	County	01073	EMC	Y	N	Y	N	Black Warrior-Tombigbee	FEMA	Metrological	Enviromental	Hail	June
37	C01073	Alabama	AL	01	Jefferson	County	01073	EMC	Y	N	Y	N	Black Warrior-Tombigbee	FEMA	Ecological	Enviromental	Wildfire	December
37	C01073	Alabama	AL	01	Jefferson	County	01073	EMC	Y	N	Y	N	Black Warrior-Tombigbee	FEMA	Ecological	Enviromental	Wildfire	February
37	C01073	Alabama	AL	01	Jefferson	County	01073	EMC	Y	N	Y	N	Black Warrior-Tombigbee	FEMA	Ecological	Enviromental	Wildfire	January
37	C01073	Alabama	AL	01	Jefferson	County	01073	EMC	Y	N	Y	N	Black Warrior-Tombigbee	FEMA	Ecological	Enviromental	Wildfire	March
37	C01073	Alabama	AL	01	Jefferson	County	01073	EMC	Y	N	Y	N	Black Warrior-Tombigbee	FEMA	Ecological	Enviromental	Wildfire	November
37	C01073	Alabama	AL	01	Jefferson	County	01073	EMC	Y	N	Y	N	Black Warrior-Tombigbee	FEMA	Ecological	Enviromental	Wildfire	September
37	C01073	Alabama	AL	01	Jefferson	County	01073	EMC	Y	N	Y	N	Black Warrior-Tombigbee	FEMA	Ecological	Enviromental	Wildfire	April
37	C01073	Alabama	AL	01	Jefferson	County	01073	EMC	Y	N	Y	N	Black Warrior-Tombigbee	FEMA	Ecological	Enviromental	Wildfire	October
46	C01091	Alabama	AL	01	Marengo	County	01091	EMC	Y	N	N	N	Black Warrior-Tombigbee	FEMA	Metrological	Enviromental	Cold Wave	November
46	C01091	Alabama	AL	01	Marengo	County	01091	EMC	Y	N	N	N	Black Warrior-Tombigbee	FEMA	Metrological	Enviromental	Cold Wave	December
46	C01091	Alabama	AL	01	Marengo	County	01091	EMC	Y	N	N	N	Black Warrior-Tombigbee	FEMA	Metrological	Enviromental	Cold Wave	January
46	C01091	Alabama	AL	01	Marengo	County	01091	EMC	Y	N	N	N	Black Warrior-Tombigbee	FEMA	Metrological	Enviromental	Cold Wave	February
46	C01091	Alabama	AL	01	Marengo	County	01091	EMC	Y	N	N	N	Black Warrior-Tombigbee	FEMA	Metrological	Enviromental	Winter Weather	November
46	C01091	Alabama	AL	01	Marengo	County	01091	EMC	Y	N	N	N	Black Warrior-Tombigbee	FEMA	Metrological	Enviromental	Winter Weather	December
46	C01091	Alabama	AL	01	Marengo	County	01091	EMC	Y	N	N	N	Black Warrior-Tombigbee	FEMA	Metrological	Enviromental	Winter Weather	January
46	C01091	Alabama	AL	01	Marengo	County	01091	EMC	Y	N	N	N	Black Warrior-Tombigbee	FEMA	Metrological	Enviromental	Winter Weather	February
46	C01091	Alabama	AL	01	Marengo	County	01091	EMC	Y	N	N	N	Black Warrior-Tombigbee	FEMA	Metrological	Enviromental	Winter Weather	March
46	C01091	Alabama	AL	01	Marengo	County	01091	EMC	Y	N	N	N	Black Warrior-Tombigbee	FEMA	Metrological	Enviromental	Hurricane	November
46	C01091	Alabama	AL	01	Marengo	County	01091	EMC	Y	N	N	N	Black Warrior-Tombigbee	FEMA	Metrological	Enviromental	Hurricane	June
46	C01091	Alabama	AL	01	Marengo	County	01091	EMC	Y	N	N	N	Black Warrior-Tombigbee	FEMA	Metrological	Enviromental	Hurricane	July
46	C01091	Alabama	AL	01	Marengo	County	01091	EMC	Y	N	N	N	Black Warrior-Tombigbee	FEMA	Metrological	Enviromental	Hurricane	August
46	C01091	Alabama	AL	01	Marengo	County	01091	EMC	Y	N	N	N	Black Warrior-Tombigbee	FEMA	Metrological	Enviromental	Hurricane	September
46	C01091	Alabama	AL	01	Marengo	County	01091	EMC	Y	N	N	N	Black Warrior-Tombigbee	FEMA	Metrological	Enviromental	Hurricane	October
9	C01017	Alabama	AL	01	Chambers	County	01017	EMC	N	N	N	N		FEMA	Metrological	Enviromental	Heat Wave	August
9	C01017	Alabama	AL	01	Chambers	County	01017	EMC	N	N	N	N		FEMA	Metrological	Enviromental	Heat Wave	September
10	C01019	Alabama	AL	01	Cherokee	County	01019	EMC	N	N	N	N		FEMA	Metrological	Enviromental	Heat Wave	June
10	C01019	Alabama	AL	01	Cherokee	County	01019	EMC	N	N	N	N		FEMA	Metrological	Enviromental	Heat Wave	July
46	C01091	Alabama	AL	01	Marengo	County	01091	EMC	Y	N	N	N	Black Warrior-Tombigbee	FEMA	Metrological	Enviromental	Cold Wave	March
46	C01091	Alabama	AL	01	Marengo	County	01091	EMC	Y	N	N	N	Black Warrior-Tombigbee	FEMA	Non Seasonal	Enviromental	Volcano
46	C01091	Alabama	AL	01	Marengo	County	01091	EMC	Y	N	N	N	Black Warrior-Tombigbee	FEMA	Non Seasonal	Enviromental	Earthquake
46	C01091	Alabama	AL	01	Marengo	County	01091	EMC	Y	N	N	N	Black Warrior-Tombigbee	FEMA	Geotechnical	Enviromental	Avalanche
46	C01091	Alabama	AL	01	Marengo	County	01091	EMC	Y	N	N	N	Black Warrior-Tombigbee	FEMA	Non Seasonal	Enviromental	Tsunami
46	C01091	Alabama	AL	01	Marengo	County	01091	EMC	Y	N	N	N	Black Warrior-Tombigbee	FEMA	Metrological	Enviromental	Hail	February
46	C01091	Alabama	AL	01	Marengo	County	01091	EMC	Y	N	N	N	Black Warrior-Tombigbee	FEMA	Metrological	Enviromental	Hail	March
46	C01091	Alabama	AL	01	Marengo	County	01091	EMC	Y	N	N	N	Black Warrior-Tombigbee	FEMA	Metrological	Enviromental	Hail	April
46	C01091	Alabama	AL	01	Marengo	County	01091	EMC	Y	N	N	N	Black Warrior-Tombigbee	FEMA	Metrological	Enviromental	Hail	May
46	C01091	Alabama	AL	01	Marengo	County	01091	EMC	Y	N	N	N	Black Warrior-Tombigbee	FEMA	Metrological	Enviromental	Hail	June
46	C01091	Alabama	AL	01	Marengo	County	01091	EMC	Y	N	N	N	Black Warrior-Tombigbee	FEMA	Ecological	Enviromental	Wildfire	December
46	C01091	Alabama	AL	01	Marengo	County	01091	EMC	Y	N	N	N	Black Warrior-Tombigbee	FEMA	Ecological	Enviromental	Wildfire	February
46	C01091	Alabama	AL	01	Marengo	County	01091	EMC	Y	N	N	N	Black Warrior-Tombigbee	FEMA	Ecological	Enviromental	Wildfire	January
46	C01091	Alabama	AL	01	Marengo	County	01091	EMC	Y	N	N	N	Black Warrior-Tombigbee	FEMA	Ecological	Enviromental	Wildfire	March
46	C01091	Alabama	AL	01	Marengo	County	01091	EMC	Y	N	N	N	Black Warrior-Tombigbee	FEMA	Ecological	Enviromental	Wildfire	November
46	C01091	Alabama	AL	01	Marengo	County	01091	EMC	Y	N	N	N	Black Warrior-Tombigbee	FEMA	Ecological	Enviromental	Wildfire	September
46	C01091	Alabama	AL	01	Marengo	County	01091	EMC	Y	N	N	N	Black Warrior-Tombigbee	FEMA	Ecological	Enviromental	Wildfire	April
46	C01091	Alabama	AL	01	Marengo	County	01091	EMC	Y	N	N	N	Black Warrior-Tombigbee	FEMA	Ecological	Enviromental	Wildfire	October
63	C01125	Alabama	AL	01	Tuscaloosa	County	01125	EMC	Y	N	N	Y	Black Warrior-Tombigbee	FEMA	Metrological	Enviromental	Cold Wave	November
63	C01125	Alabama	AL	01	Tuscaloosa	County	01125	EMC	Y	N	N	Y	Black Warrior-Tombigbee	FEMA	Metrological	Enviromental	Cold Wave	December
63	C01125	Alabama	AL	01	Tuscaloosa	County	01125	EMC	Y	N	N	Y	Black Warrior-Tombigbee	FEMA	Metrological	Enviromental	Cold Wave	January
63	C01125	Alabama	AL	01	Tuscaloosa	County	01125	EMC	Y	N	N	Y	Black Warrior-Tombigbee	FEMA	Metrological	Enviromental	Cold Wave	February
63	C01125	Alabama	AL	01	Tuscaloosa	County	01125	EMC	Y	N	N	Y	Black Warrior-Tombigbee	FEMA	Metrological	Enviromental	Winter Weather	November
63	C01125	Alabama	AL	01	Tuscaloosa	County	01125	EMC	Y	N	N	Y	Black Warrior-Tombigbee	FEMA	Metrological	Enviromental	Winter Weather	December
63	C01125	Alabama	AL	01	Tuscaloosa	County	01125	EMC	Y	N	N	Y	Black Warrior-Tombigbee	FEMA	Metrological	Enviromental	Winter Weather	January
63	C01125	Alabama	AL	01	Tuscaloosa	County	01125	EMC	Y	N	N	Y	Black Warrior-Tombigbee	FEMA	Metrological	Enviromental	Winter Weather	February
63	C01125	Alabama	AL	01	Tuscaloosa	County	01125	EMC	Y	N	N	Y	Black Warrior-Tombigbee	FEMA	Metrological	Enviromental	Winter Weather	March
63	C01125	Alabama	AL	01	Tuscaloosa	County	01125	EMC	Y	N	N	Y	Black Warrior-Tombigbee	FEMA	Metrological	Enviromental	Hurricane	November
63	C01125	Alabama	AL	01	Tuscaloosa	County	01125	EMC	Y	N	N	Y	Black Warrior-Tombigbee	FEMA	Metrological	Enviromental	Hurricane	June
63	C01125	Alabama	AL	01	Tuscaloosa	County	01125	EMC	Y	N	N	Y	Black Warrior-Tombigbee	FEMA	Metrological	Enviromental	Hurricane	July
63	C01125	Alabama	AL	01	Tuscaloosa	County	01125	EMC	Y	N	N	Y	Black Warrior-Tombigbee	FEMA	Metrological	Enviromental	Hurricane	August
63	C01125	Alabama	AL	01	Tuscaloosa	County	01125	EMC	Y	N	N	Y	Black Warrior-Tombigbee	FEMA	Metrological	Enviromental	Hurricane	September
63	C01125	Alabama	AL	01	Tuscaloosa	County	01125	EMC	Y	N	N	Y	Black Warrior-Tombigbee	FEMA	Metrological	Enviromental	Hurricane	October
10	C01019	Alabama	AL	01	Cherokee	County	01019	EMC	N	N	N	N		FEMA	Metrological	Enviromental	Heat Wave	August
10	C01019	Alabama	AL	01	Cherokee	County	01019	EMC	N	N	N	N		FEMA	Metrological	Enviromental	Heat Wave	September
11	C01021	Alabama	AL	01	Chilton	County	01021	EMC	N	N	N	N		FEMA	Metrological	Enviromental	Heat Wave	June
11	C01021	Alabama	AL	01	Chilton	County	01021	EMC	N	N	N	N		FEMA	Metrological	Enviromental	Heat Wave	July
63	C01125	Alabama	AL	01	Tuscaloosa	County	01125	EMC	Y	N	N	Y	Black Warrior-Tombigbee	FEMA	Metrological	Enviromental	Cold Wave	March
63	C01125	Alabama	AL	01	Tuscaloosa	County	01125	EMC	Y	N	N	Y	Black Warrior-Tombigbee	FEMA	Non Seasonal	Enviromental	Volcano
63	C01125	Alabama	AL	01	Tuscaloosa	County	01125	EMC	Y	N	N	Y	Black Warrior-Tombigbee	FEMA	Non Seasonal	Enviromental	Earthquake
63	C01125	Alabama	AL	01	Tuscaloosa	County	01125	EMC	Y	N	N	Y	Black Warrior-Tombigbee	FEMA	Geotechnical	Enviromental	Avalanche
63	C01125	Alabama	AL	01	Tuscaloosa	County	01125	EMC	Y	N	N	Y	Black Warrior-Tombigbee	FEMA	Non Seasonal	Enviromental	Tsunami
63	C01125	Alabama	AL	01	Tuscaloosa	County	01125	EMC	Y	N	N	Y	Black Warrior-Tombigbee	FEMA	Metrological	Enviromental	Hail	February
63	C01125	Alabama	AL	01	Tuscaloosa	County	01125	EMC	Y	N	N	Y	Black Warrior-Tombigbee	FEMA	Metrological	Enviromental	Hail	March
63	C01125	Alabama	AL	01	Tuscaloosa	County	01125	EMC	Y	N	N	Y	Black Warrior-Tombigbee	FEMA	Metrological	Enviromental	Hail	April
63	C01125	Alabama	AL	01	Tuscaloosa	County	01125	EMC	Y	N	N	Y	Black Warrior-Tombigbee	FEMA	Metrological	Enviromental	Hail	May
63	C01125	Alabama	AL	01	Tuscaloosa	County	01125	EMC	Y	N	N	Y	Black Warrior-Tombigbee	FEMA	Metrological	Enviromental	Hail	June
63	C01125	Alabama	AL	01	Tuscaloosa	County	01125	EMC	Y	N	N	Y	Black Warrior-Tombigbee	FEMA	Ecological	Enviromental	Wildfire	December
63	C01125	Alabama	AL	01	Tuscaloosa	County	01125	EMC	Y	N	N	Y	Black Warrior-Tombigbee	FEMA	Ecological	Enviromental	Wildfire	February
63	C01125	Alabama	AL	01	Tuscaloosa	County	01125	EMC	Y	N	N	Y	Black Warrior-Tombigbee	FEMA	Ecological	Enviromental	Wildfire	January
63	C01125	Alabama	AL	01	Tuscaloosa	County	01125	EMC	Y	N	N	Y	Black Warrior-Tombigbee	FEMA	Ecological	Enviromental	Wildfire	March
63	C01125	Alabama	AL	01	Tuscaloosa	County	01125	EMC	Y	N	N	Y	Black Warrior-Tombigbee	FEMA	Ecological	Enviromental	Wildfire	November
63	C01125	Alabama	AL	01	Tuscaloosa	County	01125	EMC	Y	N	N	Y	Black Warrior-Tombigbee	FEMA	Ecological	Enviromental	Wildfire	September
63	C01125	Alabama	AL	01	Tuscaloosa	County	01125	EMC	Y	N	N	Y	Black Warrior-Tombigbee	FEMA	Ecological	Enviromental	Wildfire	April
63	C01125	Alabama	AL	01	Tuscaloosa	County	01125	EMC	Y	N	N	Y	Black Warrior-Tombigbee	FEMA	Ecological	Enviromental	Wildfire	October
64	C01127	Alabama	AL	01	Walker	County	01127	EMC	Y	N	N	N	Black Warrior-Tombigbee	FEMA	Metrological	Enviromental	Cold Wave	November
64	C01127	Alabama	AL	01	Walker	County	01127	EMC	Y	N	N	N	Black Warrior-Tombigbee	FEMA	Metrological	Enviromental	Cold Wave	December
64	C01127	Alabama	AL	01	Walker	County	01127	EMC	Y	N	N	N	Black Warrior-Tombigbee	FEMA	Metrological	Enviromental	Cold Wave	January
64	C01127	Alabama	AL	01	Walker	County	01127	EMC	Y	N	N	N	Black Warrior-Tombigbee	FEMA	Metrological	Enviromental	Cold Wave	February
64	C01127	Alabama	AL	01	Walker	County	01127	EMC	Y	N	N	N	Black Warrior-Tombigbee	FEMA	Metrological	Enviromental	Winter Weather	November
64	C01127	Alabama	AL	01	Walker	County	01127	EMC	Y	N	N	N	Black Warrior-Tombigbee	FEMA	Metrological	Enviromental	Winter Weather	December
64	C01127	Alabama	AL	01	Walker	County	01127	EMC	Y	N	N	N	Black Warrior-Tombigbee	FEMA	Metrological	Enviromental	Winter Weather	January
64	C01127	Alabama	AL	01	Walker	County	01127	EMC	Y	N	N	N	Black Warrior-Tombigbee	FEMA	Metrological	Enviromental	Winter Weather	February
64	C01127	Alabama	AL	01	Walker	County	01127	EMC	Y	N	N	N	Black Warrior-Tombigbee	FEMA	Metrological	Enviromental	Winter Weather	March
64	C01127	Alabama	AL	01	Walker	County	01127	EMC	Y	N	N	N	Black Warrior-Tombigbee	FEMA	Metrological	Enviromental	Hurricane	November
64	C01127	Alabama	AL	01	Walker	County	01127	EMC	Y	N	N	N	Black Warrior-Tombigbee	FEMA	Metrological	Enviromental	Hurricane	June
64	C01127	Alabama	AL	01	Walker	County	01127	EMC	Y	N	N	N	Black Warrior-Tombigbee	FEMA	Metrological	Enviromental	Hurricane	July
64	C01127	Alabama	AL	01	Walker	County	01127	EMC	Y	N	N	N	Black Warrior-Tombigbee	FEMA	Metrological	Enviromental	Hurricane	August
64	C01127	Alabama	AL	01	Walker	County	01127	EMC	Y	N	N	N	Black Warrior-Tombigbee	FEMA	Metrological	Enviromental	Hurricane	September
64	C01127	Alabama	AL	01	Walker	County	01127	EMC	Y	N	N	N	Black Warrior-Tombigbee	FEMA	Metrological	Enviromental	Hurricane	October
11	C01021	Alabama	AL	01	Chilton	County	01021	EMC	N	N	N	N		FEMA	Metrological	Enviromental	Heat Wave	August
11	C01021	Alabama	AL	01	Chilton	County	01021	EMC	N	N	N	N		FEMA	Metrological	Enviromental	Heat Wave	September
12	C01023	Alabama	AL	01	Choctaw	County	01023	EMC	Y	N	N	N	Black Warrior-Tombigbee	Lit	Metrological	Enviromental	Heat Wave	June
12	C01023	Alabama	AL	01	Choctaw	County	01023	EMC	Y	N	N	N	Black Warrior-Tombigbee	FEMA	Metrological	Enviromental	Heat Wave	July
64	C01127	Alabama	AL	01	Walker	County	01127	EMC	Y	N	N	N	Black Warrior-Tombigbee	FEMA	Metrological	Enviromental	Cold Wave	March
64	C01127	Alabama	AL	01	Walker	County	01127	EMC	Y	N	N	N	Black Warrior-Tombigbee	FEMA	Non Seasonal	Enviromental	Volcano
64	C01127	Alabama	AL	01	Walker	County	01127	EMC	Y	N	N	N	Black Warrior-Tombigbee	FEMA	Non Seasonal	Enviromental	Earthquake
64	C01127	Alabama	AL	01	Walker	County	01127	EMC	Y	N	N	N	Black Warrior-Tombigbee	FEMA	Geotechnical	Enviromental	Avalanche
64	C01127	Alabama	AL	01	Walker	County	01127	EMC	Y	N	N	N	Black Warrior-Tombigbee	FEMA	Non Seasonal	Enviromental	Tsunami
64	C01127	Alabama	AL	01	Walker	County	01127	EMC	Y	N	N	N	Black Warrior-Tombigbee	FEMA	Metrological	Enviromental	Hail	February
64	C01127	Alabama	AL	01	Walker	County	01127	EMC	Y	N	N	N	Black Warrior-Tombigbee	FEMA	Metrological	Enviromental	Hail	March
64	C01127	Alabama	AL	01	Walker	County	01127	EMC	Y	N	N	N	Black Warrior-Tombigbee	FEMA	Metrological	Enviromental	Hail	April
64	C01127	Alabama	AL	01	Walker	County	01127	EMC	Y	N	N	N	Black Warrior-Tombigbee	FEMA	Metrological	Enviromental	Hail	May
64	C01127	Alabama	AL	01	Walker	County	01127	EMC	Y	N	N	N	Black Warrior-Tombigbee	FEMA	Metrological	Enviromental	Hail	June
64	C01127	Alabama	AL	01	Walker	County	01127	EMC	Y	N	N	N	Black Warrior-Tombigbee	FEMA	Ecological	Enviromental	Wildfire	December
64	C01127	Alabama	AL	01	Walker	County	01127	EMC	Y	N	N	N	Black Warrior-Tombigbee	FEMA	Ecological	Enviromental	Wildfire	February
64	C01127	Alabama	AL	01	Walker	County	01127	EMC	Y	N	N	N	Black Warrior-Tombigbee	FEMA	Ecological	Enviromental	Wildfire	January
64	C01127	Alabama	AL	01	Walker	County	01127	EMC	Y	N	N	N	Black Warrior-Tombigbee	FEMA	Ecological	Enviromental	Wildfire	March
64	C01127	Alabama	AL	01	Walker	County	01127	EMC	Y	N	N	N	Black Warrior-Tombigbee	FEMA	Ecological	Enviromental	Wildfire	November
64	C01127	Alabama	AL	01	Walker	County	01127	EMC	Y	N	N	N	Black Warrior-Tombigbee	FEMA	Ecological	Enviromental	Wildfire	September
64	C01127	Alabama	AL	01	Walker	County	01127	EMC	Y	N	N	N	Black Warrior-Tombigbee	FEMA	Ecological	Enviromental	Wildfire	April
64	C01127	Alabama	AL	01	Walker	County	01127	EMC	Y	N	N	N	Black Warrior-Tombigbee	FEMA	Ecological	Enviromental	Wildfire	October
65	C01129	Alabama	AL	01	Washington	County	01129	EMC	Y	N	N	N	Black Warrior-Tombigbee	FEMA	Metrological	Enviromental	Cold Wave	November
65	C01129	Alabama	AL	01	Washington	County	01129	EMC	Y	N	N	N	Black Warrior-Tombigbee	FEMA	Metrological	Enviromental	Cold Wave	December
65	C01129	Alabama	AL	01	Washington	County	01129	EMC	Y	N	N	N	Black Warrior-Tombigbee	FEMA	Metrological	Enviromental	Cold Wave	January
65	C01129	Alabama	AL	01	Washington	County	01129	EMC	Y	N	N	N	Black Warrior-Tombigbee	FEMA	Metrological	Enviromental	Cold Wave	February
65	C01129	Alabama	AL	01	Washington	County	01129	EMC	Y	N	N	N	Black Warrior-Tombigbee	FEMA	Metrological	Enviromental	Winter Weather	November
65	C01129	Alabama	AL	01	Washington	County	01129	EMC	Y	N	N	N	Black Warrior-Tombigbee	FEMA	Metrological	Enviromental	Winter Weather	December
65	C01129	Alabama	AL	01	Washington	County	01129	EMC	Y	N	N	N	Black Warrior-Tombigbee	FEMA	Metrological	Enviromental	Winter Weather	January
65	C01129	Alabama	AL	01	Washington	County	01129	EMC	Y	N	N	N	Black Warrior-Tombigbee	FEMA	Metrological	Enviromental	Winter Weather	February
65	C01129	Alabama	AL	01	Washington	County	01129	EMC	Y	N	N	N	Black Warrior-Tombigbee	FEMA	Metrological	Enviromental	Winter Weather	March
65	C01129	Alabama	AL	01	Washington	County	01129	EMC	Y	N	N	N	Black Warrior-Tombigbee	FEMA	Metrological	Enviromental	Hurricane	November
65	C01129	Alabama	AL	01	Washington	County	01129	EMC	Y	N	N	N	Black Warrior-Tombigbee	FEMA	Metrological	Enviromental	Hurricane	June
65	C01129	Alabama	AL	01	Washington	County	01129	EMC	Y	N	N	N	Black Warrior-Tombigbee	FEMA	Metrological	Enviromental	Hurricane	July
65	C01129	Alabama	AL	01	Washington	County	01129	EMC	Y	N	N	N	Black Warrior-Tombigbee	FEMA	Metrological	Enviromental	Hurricane	August
65	C01129	Alabama	AL	01	Washington	County	01129	EMC	Y	N	N	N	Black Warrior-Tombigbee	FEMA	Metrological	Enviromental	Hurricane	September
65	C01129	Alabama	AL	01	Washington	County	01129	EMC	Y	N	N	N	Black Warrior-Tombigbee	FEMA	Metrological	Enviromental	Hurricane	October
12	C01023	Alabama	AL	01	Choctaw	County	01023	EMC	Y	N	N	N	Black Warrior-Tombigbee	FEMA	Metrological	Enviromental	Heat Wave	August
12	C01023	Alabama	AL	01	Choctaw	County	01023	EMC	Y	N	N	N	Black Warrior-Tombigbee	FEMA	Metrological	Enviromental	Heat Wave	September
12	C01023	Alabama	AL	01	Choctaw	County	01023	DA	Y	N	N	N	Black Warrior-Tombigbee	Lit	Maritime	Equity	Recreational Boating	June
12	C01023	Alabama	AL	01	Choctaw	County	01023	DA	Y	N	N	N	Black Warrior-Tombigbee	Lit	Maritime	Equity	Recreational Boating	July
65	C01129	Alabama	AL	01	Washington	County	01129	EMC	Y	N	N	N	Black Warrior-Tombigbee	FEMA	Metrological	Enviromental	Cold Wave	March
65	C01129	Alabama	AL	01	Washington	County	01129	EMC	Y	N	N	N	Black Warrior-Tombigbee	FEMA	Non Seasonal	Enviromental	Volcano
65	C01129	Alabama	AL	01	Washington	County	01129	EMC	Y	N	N	N	Black Warrior-Tombigbee	FEMA	Non Seasonal	Enviromental	Earthquake
65	C01129	Alabama	AL	01	Washington	County	01129	EMC	Y	N	N	N	Black Warrior-Tombigbee	FEMA	Geotechnical	Enviromental	Avalanche
65	C01129	Alabama	AL	01	Washington	County	01129	EMC	Y	N	N	N	Black Warrior-Tombigbee	FEMA	Non Seasonal	Enviromental	Tsunami
65	C01129	Alabama	AL	01	Washington	County	01129	EMC	Y	N	N	N	Black Warrior-Tombigbee	FEMA	Metrological	Enviromental	Hail	February
65	C01129	Alabama	AL	01	Washington	County	01129	EMC	Y	N	N	N	Black Warrior-Tombigbee	FEMA	Metrological	Enviromental	Hail	March
65	C01129	Alabama	AL	01	Washington	County	01129	EMC	Y	N	N	N	Black Warrior-Tombigbee	FEMA	Metrological	Enviromental	Hail	April
65	C01129	Alabama	AL	01	Washington	County	01129	EMC	Y	N	N	N	Black Warrior-Tombigbee	FEMA	Metrological	Enviromental	Hail	May
65	C01129	Alabama	AL	01	Washington	County	01129	EMC	Y	N	N	N	Black Warrior-Tombigbee	FEMA	Metrological	Enviromental	Hail	June
65	C01129	Alabama	AL	01	Washington	County	01129	EMC	Y	N	N	N	Black Warrior-Tombigbee	FEMA	Ecological	Enviromental	Wildfire	December
65	C01129	Alabama	AL	01	Washington	County	01129	EMC	Y	N	N	N	Black Warrior-Tombigbee	FEMA	Ecological	Enviromental	Wildfire	February
65	C01129	Alabama	AL	01	Washington	County	01129	EMC	Y	N	N	N	Black Warrior-Tombigbee	FEMA	Ecological	Enviromental	Wildfire	January
65	C01129	Alabama	AL	01	Washington	County	01129	EMC	Y	N	N	N	Black Warrior-Tombigbee	FEMA	Ecological	Enviromental	Wildfire	March
65	C01129	Alabama	AL	01	Washington	County	01129	EMC	Y	N	N	N	Black Warrior-Tombigbee	FEMA	Ecological	Enviromental	Wildfire	November
65	C01129	Alabama	AL	01	Washington	County	01129	EMC	Y	N	N	N	Black Warrior-Tombigbee	FEMA	Ecological	Enviromental	Wildfire	September
65	C01129	Alabama	AL	01	Washington	County	01129	EMC	Y	N	N	N	Black Warrior-Tombigbee	FEMA	Ecological	Enviromental	Wildfire	April
65	C01129	Alabama	AL	01	Washington	County	01129	EMC	Y	N	N	N	Black Warrior-Tombigbee	FEMA	Ecological	Enviromental	Wildfire	October
1425	C28045	Mississippi	MS	28	Hancock	County	28045	EMC	Y	Y	N	N	GIWW	FEMA	Metrological	Enviromental	Cold Wave	November
1425	C28045	Mississippi	MS	28	Hancock	County	28045	EMC	Y	Y	N	N	GIWW	FEMA	Metrological	Enviromental	Cold Wave	December
1425	C28045	Mississippi	MS	28	Hancock	County	28045	EMC	Y	Y	N	N	GIWW	FEMA	Metrological	Enviromental	Cold Wave	January
1425	C28045	Mississippi	MS	28	Hancock	County	28045	EMC	Y	Y	N	N	GIWW	FEMA	Metrological	Enviromental	Cold Wave	February
1425	C28045	Mississippi	MS	28	Hancock	County	28045	EMC	Y	Y	N	N	GIWW	FEMA	Metrological	Enviromental	Winter Weather	November
1425	C28045	Mississippi	MS	28	Hancock	County	28045	EMC	Y	Y	N	N	GIWW	FEMA	Metrological	Enviromental	Winter Weather	December
1425	C28045	Mississippi	MS	28	Hancock	County	28045	EMC	Y	Y	N	N	GIWW	FEMA	Metrological	Enviromental	Winter Weather	January
1425	C28045	Mississippi	MS	28	Hancock	County	28045	EMC	Y	Y	N	N	GIWW	FEMA	Metrological	Enviromental	Winter Weather	February
1425	C28045	Mississippi	MS	28	Hancock	County	28045	EMC	Y	Y	N	N	GIWW	FEMA	Metrological	Enviromental	Winter Weather	March
1425	C28045	Mississippi	MS	28	Hancock	County	28045	EMC	Y	Y	N	N	GIWW	FEMA	Metrological	Enviromental	Hurricane	November
1425	C28045	Mississippi	MS	28	Hancock	County	28045	EMC	Y	Y	N	N	GIWW	FEMA	Metrological	Enviromental	Hurricane	June
1425	C28045	Mississippi	MS	28	Hancock	County	28045	EMC	Y	Y	N	N	GIWW	FEMA	Metrological	Enviromental	Hurricane	July
1425	C28045	Mississippi	MS	28	Hancock	County	28045	EMC	Y	Y	N	N	GIWW	FEMA	Metrological	Enviromental	Hurricane	August
1425	C28045	Mississippi	MS	28	Hancock	County	28045	EMC	Y	Y	N	N	GIWW	FEMA	Metrological	Enviromental	Hurricane	September
1425	C28045	Mississippi	MS	28	Hancock	County	28045	EMC	Y	Y	N	N	GIWW	FEMA	Metrological	Enviromental	Hurricane	October
12	C01023	Alabama	AL	01	Choctaw	County	01023	DA	Y	N	N	N	Black Warrior-Tombigbee	Lit	Maritime	Equity	Recreational Boating	August
12	C01023	Alabama	AL	01	Choctaw	County	01023	DA	Y	N	N	N	Black Warrior-Tombigbee	Lit	Maritime	Equity	Recreational Boating	September
12	C01023	Alabama	AL	01	Choctaw	County	01023	DA	Y	N	N	N	Black Warrior-Tombigbee	Lit	Maritime	Equity	Recreational Boating	May
13	C01025	Alabama	AL	01	Clarke	County	01025	EMC	Y	N	N	N	Alabama - Coosa, Black Warrior-Tombigbee	Lit	Metrological	Enviromental	Heat Wave	June
1425	C28045	Mississippi	MS	28	Hancock	County	28045	DA	Y	Y	N	N	GIWW	Lit	Cultural	Equity	Mardi Gras	February	River works, but business closures
1425	C28045	Mississippi	MS	28	Hancock	County	28045	EMC	Y	Y	N	N	GIWW	FEMA	Metrological	Enviromental	Cold Wave	March
1425	C28045	Mississippi	MS	28	Hancock	County	28045	BC	Y	Y	N	N	GIWW	Lit	Ecological	Enviromental	Termite Swarm	May	localized heavy swarms at night
1425	C28045	Mississippi	MS	28	Hancock	County	28045	EMC	Y	Y	N	N	GIWW	FEMA	Non Seasonal	Enviromental	Volcano
1425	C28045	Mississippi	MS	28	Hancock	County	28045	EMC	Y	Y	N	N	GIWW	FEMA	Non Seasonal	Enviromental	Earthquake
1425	C28045	Mississippi	MS	28	Hancock	County	28045	EMC	Y	Y	N	N	GIWW	FEMA	Geotechnical	Enviromental	Avalanche
1425	C28045	Mississippi	MS	28	Hancock	County	28045	EMC	Y	Y	N	N	GIWW	FEMA	Non Seasonal	Enviromental	Tsunami
1425	C28045	Mississippi	MS	28	Hancock	County	28045	EMC	Y	Y	N	N	GIWW	FEMA	Metrological	Enviromental	Hail	February
1425	C28045	Mississippi	MS	28	Hancock	County	28045	EMC	Y	Y	N	N	GIWW	FEMA	Metrological	Enviromental	Hail	March
1425	C28045	Mississippi	MS	28	Hancock	County	28045	EMC	Y	Y	N	N	GIWW	FEMA	Metrological	Enviromental	Hail	April
1425	C28045	Mississippi	MS	28	Hancock	County	28045	EMC	Y	Y	N	N	GIWW	FEMA	Metrological	Enviromental	Hail	May
1425	C28045	Mississippi	MS	28	Hancock	County	28045	EMC	Y	Y	N	N	GIWW	FEMA	Metrological	Enviromental	Hail	June
1425	C28045	Mississippi	MS	28	Hancock	County	28045	EMC	Y	Y	N	N	GIWW	FEMA	Ecological	Enviromental	Wildfire	December
1425	C28045	Mississippi	MS	28	Hancock	County	28045	EMC	Y	Y	N	N	GIWW	FEMA	Ecological	Enviromental	Wildfire	February
1425	C28045	Mississippi	MS	28	Hancock	County	28045	EMC	Y	Y	N	N	GIWW	FEMA	Ecological	Enviromental	Wildfire	January
1425	C28045	Mississippi	MS	28	Hancock	County	28045	EMC	Y	Y	N	N	GIWW	FEMA	Ecological	Enviromental	Wildfire	March
1425	C28045	Mississippi	MS	28	Hancock	County	28045	EMC	Y	Y	N	N	GIWW	FEMA	Ecological	Enviromental	Wildfire	November
1425	C28045	Mississippi	MS	28	Hancock	County	28045	EMC	Y	Y	N	N	GIWW	FEMA	Ecological	Enviromental	Wildfire	September
1425	C28045	Mississippi	MS	28	Hancock	County	28045	EMC	Y	Y	N	N	GIWW	FEMA	Ecological	Enviromental	Wildfire	April
1425	C28045	Mississippi	MS	28	Hancock	County	28045	EMC	Y	Y	N	N	GIWW	FEMA	Ecological	Enviromental	Wildfire	October
1425	C28045	Mississippi	MS	28	Hancock	County	28045	EMC	Y	Y	N	N	GIWW	FEMA	Fluvial	Enviromental	Coastal Flooding/Storm Surge	June
1425	C28045	Mississippi	MS	28	Hancock	County	28045	EMC	Y	Y	N	N	GIWW	FEMA	Fluvial	Enviromental	Coastal Flooding/Storm Surge	July
1425	C28045	Mississippi	MS	28	Hancock	County	28045	EMC	Y	Y	N	N	GIWW	FEMA	Fluvial	Enviromental	Coastal Flooding/Storm Surge	August
1425	C28045	Mississippi	MS	28	Hancock	County	28045	EMC	Y	Y	N	N	GIWW	FEMA	Fluvial	Enviromental	Coastal Flooding/Storm Surge	September
1425	C28045	Mississippi	MS	28	Hancock	County	28045	EMC	Y	Y	N	N	GIWW	FEMA	Fluvial	Enviromental	Coastal Flooding/Storm Surge	October
1426	C28047	Mississippi	MS	28	Harrison	County	28047	EMC	Y	Y	Y	N	GIWW	FEMA	Metrological	Enviromental	Cold Wave	November
1426	C28047	Mississippi	MS	28	Harrison	County	28047	EMC	Y	Y	Y	N	GIWW	FEMA	Metrological	Enviromental	Cold Wave	December
1426	C28047	Mississippi	MS	28	Harrison	County	28047	EMC	Y	Y	Y	N	GIWW	FEMA	Metrological	Enviromental	Cold Wave	January
1426	C28047	Mississippi	MS	28	Harrison	County	28047	EMC	Y	Y	Y	N	GIWW	FEMA	Metrological	Enviromental	Cold Wave	February
1426	C28047	Mississippi	MS	28	Harrison	County	28047	EMC	Y	Y	Y	N	GIWW	FEMA	Metrological	Enviromental	Winter Weather	November
1426	C28047	Mississippi	MS	28	Harrison	County	28047	EMC	Y	Y	Y	N	GIWW	FEMA	Metrological	Enviromental	Winter Weather	December
1426	C28047	Mississippi	MS	28	Harrison	County	28047	EMC	Y	Y	Y	N	GIWW	FEMA	Metrological	Enviromental	Winter Weather	January
1426	C28047	Mississippi	MS	28	Harrison	County	28047	EMC	Y	Y	Y	N	GIWW	FEMA	Metrological	Enviromental	Winter Weather	February
1426	C28047	Mississippi	MS	28	Harrison	County	28047	EMC	Y	Y	Y	N	GIWW	FEMA	Metrological	Enviromental	Winter Weather	March
1426	C28047	Mississippi	MS	28	Harrison	County	28047	EMC	Y	Y	Y	N	GIWW	FEMA	Metrological	Enviromental	Hurricane	November
1426	C28047	Mississippi	MS	28	Harrison	County	28047	EMC	Y	Y	Y	N	GIWW	FEMA	Metrological	Enviromental	Hurricane	June
1426	C28047	Mississippi	MS	28	Harrison	County	28047	EMC	Y	Y	Y	N	GIWW	FEMA	Metrological	Enviromental	Hurricane	July
1426	C28047	Mississippi	MS	28	Harrison	County	28047	EMC	Y	Y	Y	N	GIWW	FEMA	Metrological	Enviromental	Hurricane	August
1426	C28047	Mississippi	MS	28	Harrison	County	28047	EMC	Y	Y	Y	N	GIWW	FEMA	Metrological	Enviromental	Hurricane	September
1426	C28047	Mississippi	MS	28	Harrison	County	28047	EMC	Y	Y	Y	N	GIWW	FEMA	Metrological	Enviromental	Hurricane	October
13	C01025	Alabama	AL	01	Clarke	County	01025	EMC	Y	N	N	N	Alabama - Coosa, Black Warrior-Tombigbee	FEMA	Metrological	Enviromental	Heat Wave	July
13	C01025	Alabama	AL	01	Clarke	County	01025	EMC	Y	N	N	N	Alabama - Coosa, Black Warrior-Tombigbee	FEMA	Metrological	Enviromental	Heat Wave	August
13	C01025	Alabama	AL	01	Clarke	County	01025	EMC	Y	N	N	N	Alabama - Coosa, Black Warrior-Tombigbee	FEMA	Metrological	Enviromental	Heat Wave	September
13	C01025	Alabama	AL	01	Clarke	County	01025	DA	Y	N	N	N	Alabama - Coosa, Black Warrior-Tombigbee	Lit	Maritime	Equity	Recreational Boating	June
1426	C28047	Mississippi	MS	28	Harrison	County	28047	DA	Y	Y	Y	N	GIWW	Lit	Cultural	Equity	Mardi Gras	February	River works, but business closures
49	C01097	Mississippi	MS	28	Harrison	County	28047	BC	Y	Y	Y	N	GIWW	Lit	Maritime	Equity	Ferry	March	Ship Island Excursion
49	C01097	Mississippi	MS	28	Harrison	County	28047	BC	Y	Y	Y	N	GIWW	Lit	Maritime	Equity	Ferry	June	Ship Island Excursion
49	C01097	Mississippi	MS	28	Harrison	County	28047	BC	Y	Y	Y	N	GIWW	Lit	Maritime	Equity	Ferry	July	Ship Island Excursion
49	C01097	Mississippi	MS	28	Harrison	County	28047	BC	Y	Y	Y	N	GIWW	Lit	Maritime	Equity	Ferry	August	Ship Island Excursion
49	C01097	Mississippi	MS	28	Harrison	County	28047	BC	Y	Y	Y	N	GIWW	Lit	Maritime	Equity	Ferry	September	Ship Island Excursion
49	C01097	Mississippi	MS	28	Harrison	County	28047	BC	Y	Y	Y	N	GIWW	Lit	Maritime	Equity	Ferry	October	Ship Island Excursion
1426	C28047	Mississippi	MS	28	Harrison	County	28047	EMC	Y	Y	Y	N	GIWW	FEMA	Metrological	Enviromental	Cold Wave	March
1426	C28047	Mississippi	MS	28	Harrison	County	28047	BC	Y	Y	Y	N	GIWW	Lit	Ecological	Enviromental	Termite Swarm	May	localized heavy swarms at night
1426	C28047	Mississippi	MS	28	Harrison	County	28047	EMC	Y	Y	Y	N	GIWW	FEMA	Non Seasonal	Enviromental	Volcano
1426	C28047	Mississippi	MS	28	Harrison	County	28047	EMC	Y	Y	Y	N	GIWW	FEMA	Non Seasonal	Enviromental	Earthquake
1426	C28047	Mississippi	MS	28	Harrison	County	28047	EMC	Y	Y	Y	N	GIWW	FEMA	Geotechnical	Enviromental	Avalanche
1426	C28047	Mississippi	MS	28	Harrison	County	28047	EMC	Y	Y	Y	N	GIWW	FEMA	Non Seasonal	Enviromental	Tsunami
49	C01097	Mississippi	MS	28	Harrison	County	28047	BC	Y	Y	Y	N	GIWW	Lit	Maritime	Equity	Ferry	May	Ship Island Excursion
49	C01097	Mississippi	MS	28	Harrison	County	28047	BC	Y	Y	Y	N	GIWW	Lit	Maritime	Equity	Ferry	April	Ship Island Excursion
1426	C28047	Mississippi	MS	28	Harrison	County	28047	EMC	Y	Y	Y	N	GIWW	FEMA	Metrological	Enviromental	Hail	February
1426	C28047	Mississippi	MS	28	Harrison	County	28047	EMC	Y	Y	Y	N	GIWW	FEMA	Metrological	Enviromental	Hail	March
1426	C28047	Mississippi	MS	28	Harrison	County	28047	EMC	Y	Y	Y	N	GIWW	FEMA	Metrological	Enviromental	Hail	April
1426	C28047	Mississippi	MS	28	Harrison	County	28047	EMC	Y	Y	Y	N	GIWW	FEMA	Metrological	Enviromental	Hail	May
1426	C28047	Mississippi	MS	28	Harrison	County	28047	EMC	Y	Y	Y	N	GIWW	FEMA	Metrological	Enviromental	Hail	June
1426	C28047	Mississippi	MS	28	Harrison	County	28047	SC	Y	Y	Y	N	GIWW	Lit	Ecological	Equity	FSMC (Moth)	August	For Flighted Spony Moth, Vessels Arriving from Far East
1426	C28047	Mississippi	MS	28	Harrison	County	28047	SC	Y	Y	Y	N	GIWW	Lit	Ecological	Equity	FSMC (Moth)	July	For Flighted Spony Moth, Vessels Arriving from Far East
1426	C28047	Mississippi	MS	28	Harrison	County	28047	SC	Y	Y	Y	N	GIWW	Lit	Ecological	Equity	FSMC (Moth)	June	For Flighted Spony Moth, Vessels Arriving from Far East
1426	C28047	Mississippi	MS	28	Harrison	County	28047	SC	Y	Y	Y	N	GIWW	Lit	Ecological	Equity	FSMC (Moth)	October	For Flighted Spony Moth, Vessels Arriving from Far East
1426	C28047	Mississippi	MS	28	Harrison	County	28047	SC	Y	Y	Y	N	GIWW	Lit	Ecological	Equity	FSMC (Moth)	September	For Flighted Spony Moth, Vessels Arriving from Far East
1426	C28047	Mississippi	MS	28	Harrison	County	28047	SC	Y	Y	Y	N	GIWW	Lit	Ecological	Equity	FSMC (Moth)	May	For Flighted Spony Moth, Vessels Arriving from Far East
1426	C28047	Mississippi	MS	28	Harrison	County	28047	EMC	Y	Y	Y	N	GIWW	FEMA	Ecological	Enviromental	Wildfire	December
1426	C28047	Mississippi	MS	28	Harrison	County	28047	EMC	Y	Y	Y	N	GIWW	FEMA	Ecological	Enviromental	Wildfire	February
1426	C28047	Mississippi	MS	28	Harrison	County	28047	EMC	Y	Y	Y	N	GIWW	FEMA	Ecological	Enviromental	Wildfire	January
1426	C28047	Mississippi	MS	28	Harrison	County	28047	EMC	Y	Y	Y	N	GIWW	FEMA	Ecological	Enviromental	Wildfire	March
1426	C28047	Mississippi	MS	28	Harrison	County	28047	EMC	Y	Y	Y	N	GIWW	FEMA	Ecological	Enviromental	Wildfire	November
1426	C28047	Mississippi	MS	28	Harrison	County	28047	EMC	Y	Y	Y	N	GIWW	FEMA	Ecological	Enviromental	Wildfire	September
1426	C28047	Mississippi	MS	28	Harrison	County	28047	EMC	Y	Y	Y	N	GIWW	FEMA	Ecological	Enviromental	Wildfire	April
1426	C28047	Mississippi	MS	28	Harrison	County	28047	EMC	Y	Y	Y	N	GIWW	FEMA	Ecological	Enviromental	Wildfire	October
1426	C28047	Mississippi	MS	28	Harrison	County	28047	EMC	Y	Y	Y	N	GIWW	FEMA	Fluvial	Enviromental	Coastal Flooding/Storm Surge	June
1426	C28047	Mississippi	MS	28	Harrison	County	28047	EMC	Y	Y	Y	N	GIWW	FEMA	Fluvial	Enviromental	Coastal Flooding/Storm Surge	July
1426	C28047	Mississippi	MS	28	Harrison	County	28047	EMC	Y	Y	Y	N	GIWW	FEMA	Fluvial	Enviromental	Coastal Flooding/Storm Surge	August
1426	C28047	Mississippi	MS	28	Harrison	County	28047	EMC	Y	Y	Y	N	GIWW	FEMA	Fluvial	Enviromental	Coastal Flooding/Storm Surge	September
1426	C28047	Mississippi	MS	28	Harrison	County	28047	EMC	Y	Y	Y	N	GIWW	FEMA	Fluvial	Enviromental	Coastal Flooding/Storm Surge	October
1432	C28059	Mississippi	MS	28	Jackson	County	28059	EMC	Y	Y	Y	N	GIWW	FEMA	Metrological	Enviromental	Cold Wave	November
1432	C28059	Mississippi	MS	28	Jackson	County	28059	EMC	Y	Y	Y	N	GIWW	FEMA	Metrological	Enviromental	Cold Wave	December
1432	C28059	Mississippi	MS	28	Jackson	County	28059	EMC	Y	Y	Y	N	GIWW	FEMA	Metrological	Enviromental	Cold Wave	January
1432	C28059	Mississippi	MS	28	Jackson	County	28059	EMC	Y	Y	Y	N	GIWW	FEMA	Metrological	Enviromental	Cold Wave	February
1432	C28059	Mississippi	MS	28	Jackson	County	28059	EMC	Y	Y	Y	N	GIWW	FEMA	Metrological	Enviromental	Winter Weather	November
1432	C28059	Mississippi	MS	28	Jackson	County	28059	EMC	Y	Y	Y	N	GIWW	FEMA	Metrological	Enviromental	Winter Weather	December
1432	C28059	Mississippi	MS	28	Jackson	County	28059	EMC	Y	Y	Y	N	GIWW	FEMA	Metrological	Enviromental	Winter Weather	January
1432	C28059	Mississippi	MS	28	Jackson	County	28059	EMC	Y	Y	Y	N	GIWW	FEMA	Metrological	Enviromental	Winter Weather	February
1432	C28059	Mississippi	MS	28	Jackson	County	28059	EMC	Y	Y	Y	N	GIWW	FEMA	Metrological	Enviromental	Winter Weather	March
1432	C28059	Mississippi	MS	28	Jackson	County	28059	EMC	Y	Y	Y	N	GIWW	FEMA	Metrological	Enviromental	Hurricane	November
1432	C28059	Mississippi	MS	28	Jackson	County	28059	EMC	Y	Y	Y	N	GIWW	FEMA	Metrological	Enviromental	Hurricane	June
1432	C28059	Mississippi	MS	28	Jackson	County	28059	EMC	Y	Y	Y	N	GIWW	FEMA	Metrological	Enviromental	Hurricane	July
1432	C28059	Mississippi	MS	28	Jackson	County	28059	EMC	Y	Y	Y	N	GIWW	FEMA	Metrological	Enviromental	Hurricane	August
1432	C28059	Mississippi	MS	28	Jackson	County	28059	EMC	Y	Y	Y	N	GIWW	FEMA	Metrological	Enviromental	Hurricane	September
1432	C28059	Mississippi	MS	28	Jackson	County	28059	EMC	Y	Y	Y	N	GIWW	FEMA	Metrological	Enviromental	Hurricane	October
13	C01025	Alabama	AL	01	Clarke	County	01025	DA	Y	N	N	N	Alabama - Coosa, Black Warrior-Tombigbee	Lit	Maritime	Equity	Recreational Boating	July
13	C01025	Alabama	AL	01	Clarke	County	01025	DA	Y	N	N	N	Alabama - Coosa, Black Warrior-Tombigbee	Lit	Maritime	Equity	Recreational Boating	August
13	C01025	Alabama	AL	01	Clarke	County	01025	DA	Y	N	N	N	Alabama - Coosa, Black Warrior-Tombigbee	Lit	Maritime	Equity	Recreational Boating	September
13	C01025	Alabama	AL	01	Clarke	County	01025	DA	Y	N	N	N	Alabama - Coosa, Black Warrior-Tombigbee	Lit	Maritime	Equity	Recreational Boating	May
1432	C28059	Mississippi	MS	28	Jackson	County	28059	DA	Y	Y	Y	N	GIWW	Lit	Cultural	Equity	Mardi Gras	February	River works, but business closures
1432	C28059	Mississippi	MS	28	Jackson	County	28059	EMC	Y	Y	Y	N	GIWW	FEMA	Metrological	Enviromental	Cold Wave	March
1432	C28059	Mississippi	MS	28	Jackson	County	28059	BC	Y	Y	Y	N	GIWW	Lit	Ecological	Enviromental	Termite Swarm	May	localized heavy swarms at night
1432	C28059	Mississippi	MS	28	Jackson	County	28059	EMC	Y	Y	Y	N	GIWW	FEMA	Non Seasonal	Enviromental	Volcano
1432	C28059	Mississippi	MS	28	Jackson	County	28059	EMC	Y	Y	Y	N	GIWW	FEMA	Non Seasonal	Enviromental	Earthquake
1432	C28059	Mississippi	MS	28	Jackson	County	28059	EMC	Y	Y	Y	N	GIWW	FEMA	Geotechnical	Enviromental	Avalanche
1432	C28059	Mississippi	MS	28	Jackson	County	28059	EMC	Y	Y	Y	N	GIWW	FEMA	Non Seasonal	Enviromental	Tsunami
1432	C28059	Mississippi	MS	28	Jackson	County	28059	EMC	Y	Y	Y	N	GIWW	FEMA	Metrological	Enviromental	Hail	February
1432	C28059	Mississippi	MS	28	Jackson	County	28059	EMC	Y	Y	Y	N	GIWW	FEMA	Metrological	Enviromental	Hail	March
1432	C28059	Mississippi	MS	28	Jackson	County	28059	EMC	Y	Y	Y	N	GIWW	FEMA	Metrological	Enviromental	Hail	April
1432	C28059	Mississippi	MS	28	Jackson	County	28059	EMC	Y	Y	Y	N	GIWW	FEMA	Metrological	Enviromental	Hail	May
1432	C28059	Mississippi	MS	28	Jackson	County	28059	EMC	Y	Y	Y	N	GIWW	FEMA	Metrological	Enviromental	Hail	June
1432	C28059	Mississippi	MS	28	Jackson	County	28059	SC	Y	Y	Y	N	GIWW	Lit	Ecological	Equity	FSMC (Moth)	August	For Flighted Spony Moth, Vessels Arriving from Far East
1432	C28059	Mississippi	MS	28	Jackson	County	28059	SC	Y	Y	Y	N	GIWW	Lit	Ecological	Equity	FSMC (Moth)	July	For Flighted Spony Moth, Vessels Arriving from Far East
1432	C28059	Mississippi	MS	28	Jackson	County	28059	SC	Y	Y	Y	N	GIWW	Lit	Ecological	Equity	FSMC (Moth)	June	For Flighted Spony Moth, Vessels Arriving from Far East
1432	C28059	Mississippi	MS	28	Jackson	County	28059	SC	Y	Y	Y	N	GIWW	Lit	Ecological	Equity	FSMC (Moth)	October	For Flighted Spony Moth, Vessels Arriving from Far East
1432	C28059	Mississippi	MS	28	Jackson	County	28059	SC	Y	Y	Y	N	GIWW	Lit	Ecological	Equity	FSMC (Moth)	September	For Flighted Spony Moth, Vessels Arriving from Far East
1432	C28059	Mississippi	MS	28	Jackson	County	28059	SC	Y	Y	Y	N	GIWW	Lit	Ecological	Equity	FSMC (Moth)	May	For Flighted Spony Moth, Vessels Arriving from Far East
1432	C28059	Mississippi	MS	28	Jackson	County	28059	EMC	Y	Y	Y	N	GIWW	FEMA	Ecological	Enviromental	Wildfire	December
1432	C28059	Mississippi	MS	28	Jackson	County	28059	EMC	Y	Y	Y	N	GIWW	FEMA	Ecological	Enviromental	Wildfire	February
1432	C28059	Mississippi	MS	28	Jackson	County	28059	EMC	Y	Y	Y	N	GIWW	FEMA	Ecological	Enviromental	Wildfire	January
1432	C28059	Mississippi	MS	28	Jackson	County	28059	EMC	Y	Y	Y	N	GIWW	FEMA	Ecological	Enviromental	Wildfire	March
1432	C28059	Mississippi	MS	28	Jackson	County	28059	EMC	Y	Y	Y	N	GIWW	FEMA	Ecological	Enviromental	Wildfire	November
1432	C28059	Mississippi	MS	28	Jackson	County	28059	EMC	Y	Y	Y	N	GIWW	FEMA	Ecological	Enviromental	Wildfire	September
1432	C28059	Mississippi	MS	28	Jackson	County	28059	EMC	Y	Y	Y	N	GIWW	FEMA	Ecological	Enviromental	Wildfire	April
1432	C28059	Mississippi	MS	28	Jackson	County	28059	EMC	Y	Y	Y	N	GIWW	FEMA	Ecological	Enviromental	Wildfire	October
1432	C28059	Mississippi	MS	28	Jackson	County	28059	EMC	Y	Y	Y	N	GIWW	FEMA	Fluvial	Enviromental	Coastal Flooding/Storm Surge	June
1432	C28059	Mississippi	MS	28	Jackson	County	28059	EMC	Y	Y	Y	N	GIWW	FEMA	Fluvial	Enviromental	Coastal Flooding/Storm Surge	July
1432	C28059	Mississippi	MS	28	Jackson	County	28059	EMC	Y	Y	Y	N	GIWW	FEMA	Fluvial	Enviromental	Coastal Flooding/Storm Surge	August
1432	C28059	Mississippi	MS	28	Jackson	County	28059	EMC	Y	Y	Y	N	GIWW	FEMA	Fluvial	Enviromental	Coastal Flooding/Storm Surge	September
1432	C28059	Mississippi	MS	28	Jackson	County	28059	EMC	Y	Y	Y	N	GIWW	FEMA	Fluvial	Enviromental	Coastal Flooding/Storm Surge	October
1169	C22109	Louisiana	LA	22	Terrebonne	Parish	22109	EMC	Y	Y	N	N	GIWW	FEMA	Metrological	Enviromental	Cold Wave	November
1169	C22109	Louisiana	LA	22	Terrebonne	Parish	22109	EMC	Y	Y	N	N	GIWW	FEMA	Metrological	Enviromental	Cold Wave	December
1169	C22109	Louisiana	LA	22	Terrebonne	Parish	22109	EMC	Y	Y	N	N	GIWW	FEMA	Metrological	Enviromental	Cold Wave	January
1169	C22109	Louisiana	LA	22	Terrebonne	Parish	22109	EMC	Y	Y	N	N	GIWW	FEMA	Metrological	Enviromental	Cold Wave	February
1169	C22109	Louisiana	LA	22	Terrebonne	Parish	22109	EMC	Y	Y	N	N	GIWW	FEMA	Metrological	Enviromental	Winter Weather	November
1169	C22109	Louisiana	LA	22	Terrebonne	Parish	22109	EMC	Y	Y	N	N	GIWW	FEMA	Metrological	Enviromental	Winter Weather	December
1169	C22109	Louisiana	LA	22	Terrebonne	Parish	22109	EMC	Y	Y	N	N	GIWW	FEMA	Metrological	Enviromental	Winter Weather	January
1169	C22109	Louisiana	LA	22	Terrebonne	Parish	22109	EMC	Y	Y	N	N	GIWW	FEMA	Metrological	Enviromental	Winter Weather	February
1169	C22109	Louisiana	LA	22	Terrebonne	Parish	22109	EMC	Y	Y	N	N	GIWW	FEMA	Metrological	Enviromental	Winter Weather	March
1169	C22109	Louisiana	LA	22	Terrebonne	Parish	22109	EMC	Y	Y	N	N	GIWW	FEMA	Metrological	Enviromental	Hurricane	November
1169	C22109	Louisiana	LA	22	Terrebonne	Parish	22109	EMC	Y	Y	N	N	GIWW	FEMA	Metrological	Enviromental	Hurricane	June
1169	C22109	Louisiana	LA	22	Terrebonne	Parish	22109	EMC	Y	Y	N	N	GIWW	FEMA	Metrological	Enviromental	Hurricane	July
1169	C22109	Louisiana	LA	22	Terrebonne	Parish	22109	EMC	Y	Y	N	N	GIWW	FEMA	Metrological	Enviromental	Hurricane	August
1169	C22109	Louisiana	LA	22	Terrebonne	Parish	22109	EMC	Y	Y	N	N	GIWW	FEMA	Metrological	Enviromental	Hurricane	September
1169	C22109	Louisiana	LA	22	Terrebonne	Parish	22109	EMC	Y	Y	N	N	GIWW	FEMA	Metrological	Enviromental	Hurricane	October
1169	C22109	Louisiana	LA	22	Terrebonne	Parish	22109	BC	Y	Y	N	N	GIWW	Lit	Ecological	Enviromental	Termite Swarm	May	localized heavy swarms at night
1169	C22109	Louisiana	LA	22	Terrebonne	Parish	22109	DA	Y	Y	N	N	GIWW	Lit	Metrological	Enviromental	Marine Fog	November
1169	C22109	Louisiana	LA	22	Terrebonne	Parish	22109	DA	Y	Y	N	N	GIWW	Lit	Metrological	Enviromental	Marine Fog	January
1169	C22109	Louisiana	LA	22	Terrebonne	Parish	22109	DA	Y	Y	N	N	GIWW	Lit	Metrological	Enviromental	Marine Fog	February
1169	C22109	Louisiana	LA	22	Terrebonne	Parish	22109	DA	Y	Y	N	N	GIWW	Lit	Metrological	Enviromental	Marine Fog	March
1169	C22109	Louisiana	LA	22	Terrebonne	Parish	22109	DA	Y	Y	N	N	GIWW	Lit	Metrological	Enviromental	Marine Fog	October
1169	C22109	Louisiana	LA	22	Terrebonne	Parish	22109	DA	Y	Y	N	N	GIWW	Lit	Metrological	Enviromental	Marine Fog	December
14	C01027	Alabama	AL	01	Clay	County	01027	EMC	N	N	N	N		FEMA	Metrological	Enviromental	Heat Wave	June
14	C01027	Alabama	AL	01	Clay	County	01027	EMC	N	N	N	N		FEMA	Metrological	Enviromental	Heat Wave	July
14	C01027	Alabama	AL	01	Clay	County	01027	EMC	N	N	N	N		FEMA	Metrological	Enviromental	Heat Wave	August
14	C01027	Alabama	AL	01	Clay	County	01027	EMC	N	N	N	N		FEMA	Metrological	Enviromental	Heat Wave	September
1169	C22109	Louisiana	LA	22	Terrebonne	Parish	22109	DA	Y	Y	N	N	GIWW	Lit	Cultural	Equity	Mardi Gras	February	River works, but business closures
1169	C22109	Louisiana	LA	22	Terrebonne	Parish	22109	EMC	Y	Y	N	N	GIWW	FEMA	Metrological	Enviromental	Cold Wave	March
1169	C22109	Louisiana	LA	22	Terrebonne	Parish	22109	EMC	Y	Y	N	N	GIWW	FEMA	Non Seasonal	Enviromental	Volcano
1169	C22109	Louisiana	LA	22	Terrebonne	Parish	22109	EMC	Y	Y	N	N	GIWW	FEMA	Non Seasonal	Enviromental	Earthquake
1169	C22109	Louisiana	LA	22	Terrebonne	Parish	22109	EMC	Y	Y	N	N	GIWW	FEMA	Geotechnical	Enviromental	Avalanche
1169	C22109	Louisiana	LA	22	Terrebonne	Parish	22109	EMC	Y	Y	N	N	GIWW	FEMA	Non Seasonal	Enviromental	Tsunami
1169	C22109	Louisiana	LA	22	Terrebonne	Parish	22109	EMC	Y	Y	N	N	GIWW	FEMA	Metrological	Enviromental	Hail	February
1169	C22109	Louisiana	LA	22	Terrebonne	Parish	22109	EMC	Y	Y	N	N	GIWW	FEMA	Metrological	Enviromental	Hail	March
1169	C22109	Louisiana	LA	22	Terrebonne	Parish	22109	EMC	Y	Y	N	N	GIWW	FEMA	Metrological	Enviromental	Hail	April
1169	C22109	Louisiana	LA	22	Terrebonne	Parish	22109	EMC	Y	Y	N	N	GIWW	FEMA	Metrological	Enviromental	Hail	May
1169	C22109	Louisiana	LA	22	Terrebonne	Parish	22109	EMC	Y	Y	N	N	GIWW	FEMA	Metrological	Enviromental	Hail	June
1169	C22109	Louisiana	LA	22	Terrebonne	Parish	22109	EMC	Y	Y	N	N	GIWW	FEMA	Ecological	Enviromental	Wildfire	December
1169	C22109	Louisiana	LA	22	Terrebonne	Parish	22109	EMC	Y	Y	N	N	GIWW	FEMA	Ecological	Enviromental	Wildfire	February
1169	C22109	Louisiana	LA	22	Terrebonne	Parish	22109	EMC	Y	Y	N	N	GIWW	FEMA	Ecological	Enviromental	Wildfire	January
1169	C22109	Louisiana	LA	22	Terrebonne	Parish	22109	EMC	Y	Y	N	N	GIWW	FEMA	Ecological	Enviromental	Wildfire	March
1169	C22109	Louisiana	LA	22	Terrebonne	Parish	22109	EMC	Y	Y	N	N	GIWW	FEMA	Ecological	Enviromental	Wildfire	November
1169	C22109	Louisiana	LA	22	Terrebonne	Parish	22109	EMC	Y	Y	N	N	GIWW	FEMA	Ecological	Enviromental	Wildfire	September
1169	C22109	Louisiana	LA	22	Terrebonne	Parish	22109	EMC	Y	Y	N	N	GIWW	FEMA	Ecological	Enviromental	Wildfire	April
1169	C22109	Louisiana	LA	22	Terrebonne	Parish	22109	EMC	Y	Y	N	N	GIWW	FEMA	Ecological	Enviromental	Wildfire	October
1169	C22109	Louisiana	LA	22	Terrebonne	Parish	22109	EMC	Y	Y	N	N	GIWW	FEMA	Fluvial	Enviromental	Coastal Flooding/Storm Surge	June
1169	C22109	Louisiana	LA	22	Terrebonne	Parish	22109	EMC	Y	Y	N	N	GIWW	FEMA	Fluvial	Enviromental	Coastal Flooding/Storm Surge	July
1169	C22109	Louisiana	LA	22	Terrebonne	Parish	22109	EMC	Y	Y	N	N	GIWW	FEMA	Fluvial	Enviromental	Coastal Flooding/Storm Surge	August
1169	C22109	Louisiana	LA	22	Terrebonne	Parish	22109	EMC	Y	Y	N	N	GIWW	FEMA	Fluvial	Enviromental	Coastal Flooding/Storm Surge	September
1169	C22109	Louisiana	LA	22	Terrebonne	Parish	22109	EMC	Y	Y	N	N	GIWW	FEMA	Fluvial	Enviromental	Coastal Flooding/Storm Surge	October
1171	C22113	Louisiana	LA	22	Vermilion	Parish	22113	EMC	Y	Y	N	Y	GIWW	FEMA	Metrological	Enviromental	Cold Wave	November
1171	C22113	Louisiana	LA	22	Vermilion	Parish	22113	EMC	Y	Y	N	Y	GIWW	FEMA	Metrological	Enviromental	Cold Wave	December
1171	C22113	Louisiana	LA	22	Vermilion	Parish	22113	EMC	Y	Y	N	Y	GIWW	FEMA	Metrological	Enviromental	Cold Wave	January
1171	C22113	Louisiana	LA	22	Vermilion	Parish	22113	EMC	Y	Y	N	Y	GIWW	FEMA	Metrological	Enviromental	Cold Wave	February
1171	C22113	Louisiana	LA	22	Vermilion	Parish	22113	EMC	Y	Y	N	Y	GIWW	FEMA	Metrological	Enviromental	Winter Weather	November
1171	C22113	Louisiana	LA	22	Vermilion	Parish	22113	EMC	Y	Y	N	Y	GIWW	FEMA	Metrological	Enviromental	Winter Weather	December
1171	C22113	Louisiana	LA	22	Vermilion	Parish	22113	EMC	Y	Y	N	Y	GIWW	FEMA	Metrological	Enviromental	Winter Weather	January
1171	C22113	Louisiana	LA	22	Vermilion	Parish	22113	EMC	Y	Y	N	Y	GIWW	FEMA	Metrological	Enviromental	Winter Weather	February
1171	C22113	Louisiana	LA	22	Vermilion	Parish	22113	EMC	Y	Y	N	Y	GIWW	FEMA	Metrological	Enviromental	Winter Weather	March
1171	C22113	Louisiana	LA	22	Vermilion	Parish	22113	EMC	Y	Y	N	Y	GIWW	FEMA	Metrological	Enviromental	Hurricane	November
1171	C22113	Louisiana	LA	22	Vermilion	Parish	22113	EMC	Y	Y	N	Y	GIWW	FEMA	Metrological	Enviromental	Hurricane	June
1171	C22113	Louisiana	LA	22	Vermilion	Parish	22113	EMC	Y	Y	N	Y	GIWW	FEMA	Metrological	Enviromental	Hurricane	July
1171	C22113	Louisiana	LA	22	Vermilion	Parish	22113	EMC	Y	Y	N	Y	GIWW	FEMA	Metrological	Enviromental	Hurricane	August
1171	C22113	Louisiana	LA	22	Vermilion	Parish	22113	EMC	Y	Y	N	Y	GIWW	FEMA	Metrological	Enviromental	Hurricane	September
1171	C22113	Louisiana	LA	22	Vermilion	Parish	22113	EMC	Y	Y	N	Y	GIWW	FEMA	Metrological	Enviromental	Hurricane	October
1171	C22113	Louisiana	LA	22	Vermilion	Parish	22113	BC	Y	Y	N	Y	GIWW	Lit	Ecological	Enviromental	Termite Swarm	May	localized heavy swarms at night
1171	C22113	Louisiana	LA	22	Vermilion	Parish	22113	DA	Y	Y	N	Y	GIWW	Lit	Metrological	Enviromental	Marine Fog	November
1171	C22113	Louisiana	LA	22	Vermilion	Parish	22113	DA	Y	Y	N	Y	GIWW	Lit	Metrological	Enviromental	Marine Fog	January
1171	C22113	Louisiana	LA	22	Vermilion	Parish	22113	DA	Y	Y	N	Y	GIWW	Lit	Metrological	Enviromental	Marine Fog	February
1171	C22113	Louisiana	LA	22	Vermilion	Parish	22113	DA	Y	Y	N	Y	GIWW	Lit	Metrological	Enviromental	Marine Fog	March
1171	C22113	Louisiana	LA	22	Vermilion	Parish	22113	DA	Y	Y	N	Y	GIWW	Lit	Metrological	Enviromental	Marine Fog	October
1171	C22113	Louisiana	LA	22	Vermilion	Parish	22113	DA	Y	Y	N	Y	GIWW	Lit	Metrological	Enviromental	Marine Fog	December
15	C01029	Alabama	AL	01	Cleburne	County	01029	EMC	N	N	N	N		FEMA	Metrological	Enviromental	Heat Wave	June
15	C01029	Alabama	AL	01	Cleburne	County	01029	EMC	N	N	N	N		FEMA	Metrological	Enviromental	Heat Wave	July
15	C01029	Alabama	AL	01	Cleburne	County	01029	EMC	N	N	N	N		FEMA	Metrological	Enviromental	Heat Wave	August
15	C01029	Alabama	AL	01	Cleburne	County	01029	EMC	N	N	N	N		FEMA	Metrological	Enviromental	Heat Wave	September
1171	C22113	Louisiana	LA	22	Vermilion	Parish	22113	DA	Y	Y	N	Y	GIWW	Lit	Cultural	Equity	Mardi Gras	February	River works, but business closures
1171	C22113	Louisiana	LA	22	Vermilion	Parish	22113	EMC	Y	Y	N	Y	GIWW	FEMA	Metrological	Enviromental	Cold Wave	March
1171	C22113	Louisiana	LA	22	Vermilion	Parish	22113	EMC	Y	Y	N	Y	GIWW	FEMA	Non Seasonal	Enviromental	Volcano
1171	C22113	Louisiana	LA	22	Vermilion	Parish	22113	EMC	Y	Y	N	Y	GIWW	FEMA	Non Seasonal	Enviromental	Earthquake
1171	C22113	Louisiana	LA	22	Vermilion	Parish	22113	EMC	Y	Y	N	Y	GIWW	FEMA	Geotechnical	Enviromental	Avalanche
1171	C22113	Louisiana	LA	22	Vermilion	Parish	22113	EMC	Y	Y	N	Y	GIWW	FEMA	Non Seasonal	Enviromental	Tsunami
1171	C22113	Louisiana	LA	22	Vermilion	Parish	22113	EMC	Y	Y	N	Y	GIWW	FEMA	Metrological	Enviromental	Hail	February
1171	C22113	Louisiana	LA	22	Vermilion	Parish	22113	EMC	Y	Y	N	Y	GIWW	FEMA	Metrological	Enviromental	Hail	March
1171	C22113	Louisiana	LA	22	Vermilion	Parish	22113	EMC	Y	Y	N	Y	GIWW	FEMA	Metrological	Enviromental	Hail	April
1171	C22113	Louisiana	LA	22	Vermilion	Parish	22113	EMC	Y	Y	N	Y	GIWW	FEMA	Metrological	Enviromental	Hail	May
1171	C22113	Louisiana	LA	22	Vermilion	Parish	22113	EMC	Y	Y	N	Y	GIWW	FEMA	Metrological	Enviromental	Hail	June
1171	C22113	Louisiana	LA	22	Vermilion	Parish	22113	EMC	Y	Y	N	Y	GIWW	FEMA	Ecological	Enviromental	Wildfire	December
1171	C22113	Louisiana	LA	22	Vermilion	Parish	22113	EMC	Y	Y	N	Y	GIWW	FEMA	Ecological	Enviromental	Wildfire	February
1171	C22113	Louisiana	LA	22	Vermilion	Parish	22113	EMC	Y	Y	N	Y	GIWW	FEMA	Ecological	Enviromental	Wildfire	January
1171	C22113	Louisiana	LA	22	Vermilion	Parish	22113	EMC	Y	Y	N	Y	GIWW	FEMA	Ecological	Enviromental	Wildfire	March
1171	C22113	Louisiana	LA	22	Vermilion	Parish	22113	EMC	Y	Y	N	Y	GIWW	FEMA	Ecological	Enviromental	Wildfire	November
1171	C22113	Louisiana	LA	22	Vermilion	Parish	22113	EMC	Y	Y	N	Y	GIWW	FEMA	Ecological	Enviromental	Wildfire	September
1171	C22113	Louisiana	LA	22	Vermilion	Parish	22113	EMC	Y	Y	N	Y	GIWW	FEMA	Ecological	Enviromental	Wildfire	April
1171	C22113	Louisiana	LA	22	Vermilion	Parish	22113	EMC	Y	Y	N	Y	GIWW	FEMA	Ecological	Enviromental	Wildfire	October
1171	C22113	Louisiana	LA	22	Vermilion	Parish	22113	EMC	Y	Y	N	Y	GIWW	FEMA	Fluvial	Enviromental	Coastal Flooding/Storm Surge	June
1171	C22113	Louisiana	LA	22	Vermilion	Parish	22113	EMC	Y	Y	N	Y	GIWW	FEMA	Fluvial	Enviromental	Coastal Flooding/Storm Surge	July
1171	C22113	Louisiana	LA	22	Vermilion	Parish	22113	EMC	Y	Y	N	Y	GIWW	FEMA	Fluvial	Enviromental	Coastal Flooding/Storm Surge	August
1171	C22113	Louisiana	LA	22	Vermilion	Parish	22113	EMC	Y	Y	N	Y	GIWW	FEMA	Fluvial	Enviromental	Coastal Flooding/Storm Surge	September
1171	C22113	Louisiana	LA	22	Vermilion	Parish	22113	EMC	Y	Y	N	Y	GIWW	FEMA	Fluvial	Enviromental	Coastal Flooding/Storm Surge	October
2	C01003	Alabama	AL	01	Baldwin	County	01003	EMC	Y	Y	N	N	GIWW, Alabama - Coosa	FEMA	Metrological	Enviromental	Cold Wave	November
2	C01003	Alabama	AL	01	Baldwin	County	01003	EMC	Y	Y	N	N	GIWW, Alabama - Coosa	FEMA	Metrological	Enviromental	Cold Wave	December
2	C01003	Alabama	AL	01	Baldwin	County	01003	EMC	Y	Y	N	N	GIWW, Alabama - Coosa	FEMA	Metrological	Enviromental	Cold Wave	January
2	C01003	Alabama	AL	01	Baldwin	County	01003	EMC	Y	Y	N	N	GIWW, Alabama - Coosa	FEMA	Metrological	Enviromental	Cold Wave	February
2	C01003	Alabama	AL	01	Baldwin	County	01003	EMC	Y	Y	N	N	GIWW, Alabama - Coosa	FEMA	Metrological	Enviromental	Winter Weather	November
2	C01003	Alabama	AL	01	Baldwin	County	01003	EMC	Y	Y	N	N	GIWW, Alabama - Coosa	FEMA	Metrological	Enviromental	Winter Weather	December
2	C01003	Alabama	AL	01	Baldwin	County	01003	EMC	Y	Y	N	N	GIWW, Alabama - Coosa	FEMA	Metrological	Enviromental	Winter Weather	January
2	C01003	Alabama	AL	01	Baldwin	County	01003	EMC	Y	Y	N	N	GIWW, Alabama - Coosa	FEMA	Metrological	Enviromental	Winter Weather	February
2	C01003	Alabama	AL	01	Baldwin	County	01003	EMC	Y	Y	N	N	GIWW, Alabama - Coosa	FEMA	Metrological	Enviromental	Winter Weather	March
2	C01003	Alabama	AL	01	Baldwin	County	01003	EMC	Y	Y	N	N	GIWW, Alabama - Coosa	FEMA	Metrological	Enviromental	Hurricane	November
2	C01003	Alabama	AL	01	Baldwin	County	01003	EMC	Y	Y	N	N	GIWW, Alabama - Coosa	FEMA	Metrological	Enviromental	Hurricane	June
2	C01003	Alabama	AL	01	Baldwin	County	01003	EMC	Y	Y	N	N	GIWW, Alabama - Coosa	FEMA	Metrological	Enviromental	Hurricane	July
2	C01003	Alabama	AL	01	Baldwin	County	01003	EMC	Y	Y	N	N	GIWW, Alabama - Coosa	FEMA	Metrological	Enviromental	Hurricane	August
2	C01003	Alabama	AL	01	Baldwin	County	01003	EMC	Y	Y	N	N	GIWW, Alabama - Coosa	FEMA	Metrological	Enviromental	Hurricane	September
2	C01003	Alabama	AL	01	Baldwin	County	01003	EMC	Y	Y	N	N	GIWW, Alabama - Coosa	FEMA	Metrological	Enviromental	Hurricane	October
16	C01031	Alabama	AL	01	Coffee	County	01031	EMC	N	N	N	N		FEMA	Metrological	Enviromental	Heat Wave	June
16	C01031	Alabama	AL	01	Coffee	County	01031	EMC	N	N	N	N		FEMA	Metrological	Enviromental	Heat Wave	July
16	C01031	Alabama	AL	01	Coffee	County	01031	EMC	N	N	N	N		FEMA	Metrological	Enviromental	Heat Wave	August
16	C01031	Alabama	AL	01	Coffee	County	01031	EMC	N	N	N	N		FEMA	Metrological	Enviromental	Heat Wave	September
2	C01003	Alabama	AL	01	Baldwin	County	01003	DA	Y	Y	N	N	GIWW, Alabama - Coosa	Lit	Cultural	Equity	Mardi Gras	February	River works, but business closures
49	C01097	Alabama	AL	01	Baldwin	County	01003	BC	Y	Y	N	N	GIWW, Alabama - Coosa	Lit	Maritime	Equity	Ferry	January	Mobile Bay Ferry
49	C01097	Alabama	AL	01	Baldwin	County	01003	BC	Y	Y	N	N	GIWW, Alabama - Coosa	Lit	Maritime	Equity	Ferry	February	Mobile Bay Ferry
49	C01097	Alabama	AL	01	Baldwin	County	01003	BC	Y	Y	N	N	GIWW, Alabama - Coosa	Lit	Maritime	Equity	Ferry	March	Mobile Bay Ferry
49	C01097	Alabama	AL	01	Baldwin	County	01003	BC	Y	Y	N	N	GIWW, Alabama - Coosa	Lit	Maritime	Equity	Ferry	June	Mobile Bay Ferry
49	C01097	Alabama	AL	01	Baldwin	County	01003	BC	Y	Y	N	N	GIWW, Alabama - Coosa	Lit	Maritime	Equity	Ferry	July	Mobile Bay Ferry
49	C01097	Alabama	AL	01	Baldwin	County	01003	BC	Y	Y	N	N	GIWW, Alabama - Coosa	Lit	Maritime	Equity	Ferry	August	Mobile Bay Ferry
49	C01097	Alabama	AL	01	Baldwin	County	01003	BC	Y	Y	N	N	GIWW, Alabama - Coosa	Lit	Maritime	Equity	Ferry	September	Mobile Bay Ferry
49	C01097	Alabama	AL	01	Baldwin	County	01003	BC	Y	Y	N	N	GIWW, Alabama - Coosa	Lit	Maritime	Equity	Ferry	October	Mobile Bay Ferry
49	C01097	Alabama	AL	01	Baldwin	County	01003	BC	Y	Y	N	N	GIWW, Alabama - Coosa	Lit	Maritime	Equity	Ferry	November	Mobile Bay Ferry
49	C01097	Alabama	AL	01	Baldwin	County	01003	BC	Y	Y	N	N	GIWW, Alabama - Coosa	Lit	Maritime	Equity	Ferry	December	Mobile Bay Ferry
2	C01003	Alabama	AL	01	Baldwin	County	01003	EMC	Y	Y	N	N	GIWW, Alabama - Coosa	FEMA	Metrological	Enviromental	Cold Wave	March
2	C01003	Alabama	AL	01	Baldwin	County	01003	BC	Y	Y	N	N	GIWW, Alabama - Coosa	Lit	Ecological	Enviromental	Termite Swarm	May	localized heavy swarms at night
2	C01003	Alabama	AL	01	Baldwin	County	01003	EMC	Y	Y	N	N	GIWW, Alabama - Coosa	FEMA	Non Seasonal	Enviromental	Volcano
2	C01003	Alabama	AL	01	Baldwin	County	01003	EMC	Y	Y	N	N	GIWW, Alabama - Coosa	FEMA	Non Seasonal	Enviromental	Earthquake
2	C01003	Alabama	AL	01	Baldwin	County	01003	EMC	Y	Y	N	N	GIWW, Alabama - Coosa	FEMA	Geotechnical	Enviromental	Avalanche
2	C01003	Alabama	AL	01	Baldwin	County	01003	EMC	Y	Y	N	N	GIWW, Alabama - Coosa	FEMA	Non Seasonal	Enviromental	Tsunami
49	C01097	Alabama	AL	01	Baldwin	County	01003	BC	Y	Y	N	N	GIWW, Alabama - Coosa	Lit	Maritime	Equity	Ferry	May	Mobile Bay Ferry
49	C01097	Alabama	AL	01	Baldwin	County	01003	BC	Y	Y	N	N	GIWW, Alabama - Coosa	Lit	Maritime	Equity	Ferry	April	Mobile Bay Ferry
2	C01003	Alabama	AL	01	Baldwin	County	01003	EMC	Y	Y	N	N	GIWW, Alabama - Coosa	FEMA	Metrological	Enviromental	Hail	February
2	C01003	Alabama	AL	01	Baldwin	County	01003	EMC	Y	Y	N	N	GIWW, Alabama - Coosa	FEMA	Metrological	Enviromental	Hail	March
2	C01003	Alabama	AL	01	Baldwin	County	01003	EMC	Y	Y	N	N	GIWW, Alabama - Coosa	FEMA	Metrological	Enviromental	Hail	April
2	C01003	Alabama	AL	01	Baldwin	County	01003	EMC	Y	Y	N	N	GIWW, Alabama - Coosa	FEMA	Metrological	Enviromental	Hail	May
2	C01003	Alabama	AL	01	Baldwin	County	01003	EMC	Y	Y	N	N	GIWW, Alabama - Coosa	FEMA	Metrological	Enviromental	Hail	June
2	C01003	Alabama	AL	01	Baldwin	County	01003	EMC	Y	Y	N	N	GIWW, Alabama - Coosa	FEMA	Ecological	Enviromental	Wildfire	December
2	C01003	Alabama	AL	01	Baldwin	County	01003	EMC	Y	Y	N	N	GIWW, Alabama - Coosa	FEMA	Ecological	Enviromental	Wildfire	February
2	C01003	Alabama	AL	01	Baldwin	County	01003	EMC	Y	Y	N	N	GIWW, Alabama - Coosa	FEMA	Ecological	Enviromental	Wildfire	January
2	C01003	Alabama	AL	01	Baldwin	County	01003	EMC	Y	Y	N	N	GIWW, Alabama - Coosa	FEMA	Ecological	Enviromental	Wildfire	March
2	C01003	Alabama	AL	01	Baldwin	County	01003	EMC	Y	Y	N	N	GIWW, Alabama - Coosa	FEMA	Ecological	Enviromental	Wildfire	November
2	C01003	Alabama	AL	01	Baldwin	County	01003	EMC	Y	Y	N	N	GIWW, Alabama - Coosa	FEMA	Ecological	Enviromental	Wildfire	September
2	C01003	Alabama	AL	01	Baldwin	County	01003	EMC	Y	Y	N	N	GIWW, Alabama - Coosa	FEMA	Ecological	Enviromental	Wildfire	April
2	C01003	Alabama	AL	01	Baldwin	County	01003	EMC	Y	Y	N	N	GIWW, Alabama - Coosa	FEMA	Ecological	Enviromental	Wildfire	October
2	C01003	Alabama	AL	01	Baldwin	County	01003	EMC	Y	Y	N	N	GIWW, Alabama - Coosa	FEMA	Fluvial	Enviromental	Coastal Flooding/Storm Surge	June
2	C01003	Alabama	AL	01	Baldwin	County	01003	EMC	Y	Y	N	N	GIWW, Alabama - Coosa	FEMA	Fluvial	Enviromental	Coastal Flooding/Storm Surge	July
2	C01003	Alabama	AL	01	Baldwin	County	01003	EMC	Y	Y	N	N	GIWW, Alabama - Coosa	FEMA	Fluvial	Enviromental	Coastal Flooding/Storm Surge	August
2	C01003	Alabama	AL	01	Baldwin	County	01003	EMC	Y	Y	N	N	GIWW, Alabama - Coosa	FEMA	Fluvial	Enviromental	Coastal Flooding/Storm Surge	September
2	C01003	Alabama	AL	01	Baldwin	County	01003	EMC	Y	Y	N	N	GIWW, Alabama - Coosa	FEMA	Fluvial	Enviromental	Coastal Flooding/Storm Surge	October
1118	C22007	Louisiana	LA	22	Assumption	Parish	22007	EMC	Y	Y	N	N	GIWW, Bayou Lafourche	FEMA	Metrological	Enviromental	Cold Wave	November
1118	C22007	Louisiana	LA	22	Assumption	Parish	22007	EMC	Y	Y	N	N	GIWW, Bayou Lafourche	FEMA	Metrological	Enviromental	Cold Wave	December
1118	C22007	Louisiana	LA	22	Assumption	Parish	22007	EMC	Y	Y	N	N	GIWW, Bayou Lafourche	FEMA	Metrological	Enviromental	Cold Wave	January
1118	C22007	Louisiana	LA	22	Assumption	Parish	22007	EMC	Y	Y	N	N	GIWW, Bayou Lafourche	FEMA	Metrological	Enviromental	Cold Wave	February
1118	C22007	Louisiana	LA	22	Assumption	Parish	22007	EMC	Y	Y	N	N	GIWW, Bayou Lafourche	FEMA	Metrological	Enviromental	Winter Weather	November
1118	C22007	Louisiana	LA	22	Assumption	Parish	22007	EMC	Y	Y	N	N	GIWW, Bayou Lafourche	FEMA	Metrological	Enviromental	Winter Weather	December
1118	C22007	Louisiana	LA	22	Assumption	Parish	22007	EMC	Y	Y	N	N	GIWW, Bayou Lafourche	FEMA	Metrological	Enviromental	Winter Weather	January
1118	C22007	Louisiana	LA	22	Assumption	Parish	22007	EMC	Y	Y	N	N	GIWW, Bayou Lafourche	FEMA	Metrological	Enviromental	Winter Weather	February
1118	C22007	Louisiana	LA	22	Assumption	Parish	22007	EMC	Y	Y	N	N	GIWW, Bayou Lafourche	FEMA	Metrological	Enviromental	Winter Weather	March
1118	C22007	Louisiana	LA	22	Assumption	Parish	22007	EMC	Y	Y	N	N	GIWW, Bayou Lafourche	FEMA	Metrological	Enviromental	Hurricane	November
1118	C22007	Louisiana	LA	22	Assumption	Parish	22007	EMC	Y	Y	N	N	GIWW, Bayou Lafourche	FEMA	Metrological	Enviromental	Hurricane	June
1118	C22007	Louisiana	LA	22	Assumption	Parish	22007	EMC	Y	Y	N	N	GIWW, Bayou Lafourche	FEMA	Metrological	Enviromental	Hurricane	July
1118	C22007	Louisiana	LA	22	Assumption	Parish	22007	EMC	Y	Y	N	N	GIWW, Bayou Lafourche	FEMA	Metrological	Enviromental	Hurricane	August
1118	C22007	Louisiana	LA	22	Assumption	Parish	22007	EMC	Y	Y	N	N	GIWW, Bayou Lafourche	FEMA	Metrological	Enviromental	Hurricane	September
1118	C22007	Louisiana	LA	22	Assumption	Parish	22007	EMC	Y	Y	N	N	GIWW, Bayou Lafourche	FEMA	Metrological	Enviromental	Hurricane	October
1118	C22007	Louisiana	LA	22	Assumption	Parish	22007	BC	Y	Y	N	N	GIWW, Bayou Lafourche	Lit	Ecological	Enviromental	Termite Swarm	May	localized heavy swarms at night
1118	C22007	Louisiana	LA	22	Assumption	Parish	22007	DA	Y	Y	N	N	GIWW, Bayou Lafourche	Lit	Metrological	Enviromental	Marine Fog	November
1118	C22007	Louisiana	LA	22	Assumption	Parish	22007	DA	Y	Y	N	N	GIWW, Bayou Lafourche	Lit	Metrological	Enviromental	Marine Fog	January
1118	C22007	Louisiana	LA	22	Assumption	Parish	22007	DA	Y	Y	N	N	GIWW, Bayou Lafourche	Lit	Metrological	Enviromental	Marine Fog	February
1118	C22007	Louisiana	LA	22	Assumption	Parish	22007	DA	Y	Y	N	N	GIWW, Bayou Lafourche	Lit	Metrological	Enviromental	Marine Fog	March
1118	C22007	Louisiana	LA	22	Assumption	Parish	22007	DA	Y	Y	N	N	GIWW, Bayou Lafourche	Lit	Metrological	Enviromental	Marine Fog	October
1118	C22007	Louisiana	LA	22	Assumption	Parish	22007	DA	Y	Y	N	N	GIWW, Bayou Lafourche	Lit	Metrological	Enviromental	Marine Fog	December
17	C01033	Alabama	AL	01	Colbert	County	01033	EMC	Y	N	N	N	Tennessee	Lit	Metrological	Enviromental	Heat Wave	June
17	C01033	Alabama	AL	01	Colbert	County	01033	EMC	Y	N	N	N	Tennessee	FEMA	Metrological	Enviromental	Heat Wave	July
17	C01033	Alabama	AL	01	Colbert	County	01033	EMC	Y	N	N	N	Tennessee	FEMA	Metrological	Enviromental	Heat Wave	August
17	C01033	Alabama	AL	01	Colbert	County	01033	EMC	Y	N	N	N	Tennessee	FEMA	Metrological	Enviromental	Heat Wave	September
1118	C22007	Louisiana	LA	22	Assumption	Parish	22007	DA	Y	Y	N	N	GIWW, Bayou Lafourche	Lit	Cultural	Equity	Mardi Gras	February	River works, but business closures
1118	C22007	Louisiana	LA	22	Assumption	Parish	22007	EMC	Y	Y	N	N	GIWW, Bayou Lafourche	FEMA	Metrological	Enviromental	Cold Wave	March
1118	C22007	Louisiana	LA	22	Assumption	Parish	22007	EMC	Y	Y	N	N	GIWW, Bayou Lafourche	FEMA	Non Seasonal	Enviromental	Volcano
1118	C22007	Louisiana	LA	22	Assumption	Parish	22007	EMC	Y	Y	N	N	GIWW, Bayou Lafourche	FEMA	Non Seasonal	Enviromental	Earthquake
1118	C22007	Louisiana	LA	22	Assumption	Parish	22007	EMC	Y	Y	N	N	GIWW, Bayou Lafourche	FEMA	Geotechnical	Enviromental	Avalanche
1118	C22007	Louisiana	LA	22	Assumption	Parish	22007	EMC	Y	Y	N	N	GIWW, Bayou Lafourche	FEMA	Non Seasonal	Enviromental	Tsunami
1118	C22007	Louisiana	LA	22	Assumption	Parish	22007	EMC	Y	Y	N	N	GIWW, Bayou Lafourche	FEMA	Metrological	Enviromental	Hail	February
1118	C22007	Louisiana	LA	22	Assumption	Parish	22007	EMC	Y	Y	N	N	GIWW, Bayou Lafourche	FEMA	Metrological	Enviromental	Hail	March
1118	C22007	Louisiana	LA	22	Assumption	Parish	22007	EMC	Y	Y	N	N	GIWW, Bayou Lafourche	FEMA	Metrological	Enviromental	Hail	April
1118	C22007	Louisiana	LA	22	Assumption	Parish	22007	EMC	Y	Y	N	N	GIWW, Bayou Lafourche	FEMA	Metrological	Enviromental	Hail	May
1118	C22007	Louisiana	LA	22	Assumption	Parish	22007	EMC	Y	Y	N	N	GIWW, Bayou Lafourche	FEMA	Metrological	Enviromental	Hail	June
1118	C22007	Louisiana	LA	22	Assumption	Parish	22007	EMC	Y	Y	N	N	GIWW, Bayou Lafourche	FEMA	Ecological	Enviromental	Wildfire	December
1118	C22007	Louisiana	LA	22	Assumption	Parish	22007	EMC	Y	Y	N	N	GIWW, Bayou Lafourche	FEMA	Ecological	Enviromental	Wildfire	February
1118	C22007	Louisiana	LA	22	Assumption	Parish	22007	EMC	Y	Y	N	N	GIWW, Bayou Lafourche	FEMA	Ecological	Enviromental	Wildfire	January
1118	C22007	Louisiana	LA	22	Assumption	Parish	22007	EMC	Y	Y	N	N	GIWW, Bayou Lafourche	FEMA	Ecological	Enviromental	Wildfire	March
1118	C22007	Louisiana	LA	22	Assumption	Parish	22007	EMC	Y	Y	N	N	GIWW, Bayou Lafourche	FEMA	Ecological	Enviromental	Wildfire	November
1118	C22007	Louisiana	LA	22	Assumption	Parish	22007	EMC	Y	Y	N	N	GIWW, Bayou Lafourche	FEMA	Ecological	Enviromental	Wildfire	September
1118	C22007	Louisiana	LA	22	Assumption	Parish	22007	EMC	Y	Y	N	N	GIWW, Bayou Lafourche	FEMA	Ecological	Enviromental	Wildfire	April
1118	C22007	Louisiana	LA	22	Assumption	Parish	22007	EMC	Y	Y	N	N	GIWW, Bayou Lafourche	FEMA	Ecological	Enviromental	Wildfire	October
1118	C22007	Louisiana	LA	22	Assumption	Parish	22007	EMC	Y	Y	N	N	GIWW, Bayou Lafourche	FEMA	Fluvial	Enviromental	Coastal Flooding/Storm Surge	June
1118	C22007	Louisiana	LA	22	Assumption	Parish	22007	EMC	Y	Y	N	N	GIWW, Bayou Lafourche	FEMA	Fluvial	Enviromental	Coastal Flooding/Storm Surge	July
1118	C22007	Louisiana	LA	22	Assumption	Parish	22007	EMC	Y	Y	N	N	GIWW, Bayou Lafourche	FEMA	Fluvial	Enviromental	Coastal Flooding/Storm Surge	August
1118	C22007	Louisiana	LA	22	Assumption	Parish	22007	EMC	Y	Y	N	N	GIWW, Bayou Lafourche	FEMA	Fluvial	Enviromental	Coastal Flooding/Storm Surge	September
1118	C22007	Louisiana	LA	22	Assumption	Parish	22007	EMC	Y	Y	N	N	GIWW, Bayou Lafourche	FEMA	Fluvial	Enviromental	Coastal Flooding/Storm Surge	October
1143	C22057	Louisiana	LA	22	Lafourche	Parish	22057	EMC	Y	Y	N	N	GIWW, Bayou Lafourche	FEMA	Metrological	Enviromental	Cold Wave	November
1143	C22057	Louisiana	LA	22	Lafourche	Parish	22057	EMC	Y	Y	N	N	GIWW, Bayou Lafourche	FEMA	Metrological	Enviromental	Cold Wave	December
1143	C22057	Louisiana	LA	22	Lafourche	Parish	22057	EMC	Y	Y	N	N	GIWW, Bayou Lafourche	FEMA	Metrological	Enviromental	Cold Wave	January
1143	C22057	Louisiana	LA	22	Lafourche	Parish	22057	EMC	Y	Y	N	N	GIWW, Bayou Lafourche	FEMA	Metrological	Enviromental	Cold Wave	February
1143	C22057	Louisiana	LA	22	Lafourche	Parish	22057	EMC	Y	Y	N	N	GIWW, Bayou Lafourche	FEMA	Metrological	Enviromental	Winter Weather	November
1143	C22057	Louisiana	LA	22	Lafourche	Parish	22057	EMC	Y	Y	N	N	GIWW, Bayou Lafourche	FEMA	Metrological	Enviromental	Winter Weather	December
1143	C22057	Louisiana	LA	22	Lafourche	Parish	22057	EMC	Y	Y	N	N	GIWW, Bayou Lafourche	FEMA	Metrological	Enviromental	Winter Weather	January
1143	C22057	Louisiana	LA	22	Lafourche	Parish	22057	EMC	Y	Y	N	N	GIWW, Bayou Lafourche	FEMA	Metrological	Enviromental	Winter Weather	February
1143	C22057	Louisiana	LA	22	Lafourche	Parish	22057	EMC	Y	Y	N	N	GIWW, Bayou Lafourche	FEMA	Metrological	Enviromental	Winter Weather	March
1143	C22057	Louisiana	LA	22	Lafourche	Parish	22057	EMC	Y	Y	N	N	GIWW, Bayou Lafourche	FEMA	Metrological	Enviromental	Hurricane	November
1143	C22057	Louisiana	LA	22	Lafourche	Parish	22057	EMC	Y	Y	N	N	GIWW, Bayou Lafourche	FEMA	Metrological	Enviromental	Hurricane	June
1143	C22057	Louisiana	LA	22	Lafourche	Parish	22057	EMC	Y	Y	N	N	GIWW, Bayou Lafourche	FEMA	Metrological	Enviromental	Hurricane	July
1143	C22057	Louisiana	LA	22	Lafourche	Parish	22057	EMC	Y	Y	N	N	GIWW, Bayou Lafourche	FEMA	Metrological	Enviromental	Hurricane	August
1143	C22057	Louisiana	LA	22	Lafourche	Parish	22057	EMC	Y	Y	N	N	GIWW, Bayou Lafourche	FEMA	Metrological	Enviromental	Hurricane	September
1143	C22057	Louisiana	LA	22	Lafourche	Parish	22057	EMC	Y	Y	N	N	GIWW, Bayou Lafourche	FEMA	Metrological	Enviromental	Hurricane	October
1143	C22057	Louisiana	LA	22	Lafourche	Parish	22057	BC	Y	Y	N	N	GIWW, Bayou Lafourche	Lit	Ecological	Enviromental	Termite Swarm	May	localized heavy swarms at night
1143	C22057	Louisiana	LA	22	Lafourche	Parish	22057	DA	Y	Y	N	N	GIWW, Bayou Lafourche	Lit	Metrological	Enviromental	Marine Fog	November
1143	C22057	Louisiana	LA	22	Lafourche	Parish	22057	DA	Y	Y	N	N	GIWW, Bayou Lafourche	Lit	Metrological	Enviromental	Marine Fog	January
1143	C22057	Louisiana	LA	22	Lafourche	Parish	22057	DA	Y	Y	N	N	GIWW, Bayou Lafourche	Lit	Metrological	Enviromental	Marine Fog	February
1143	C22057	Louisiana	LA	22	Lafourche	Parish	22057	DA	Y	Y	N	N	GIWW, Bayou Lafourche	Lit	Metrological	Enviromental	Marine Fog	March
1143	C22057	Louisiana	LA	22	Lafourche	Parish	22057	DA	Y	Y	N	N	GIWW, Bayou Lafourche	Lit	Metrological	Enviromental	Marine Fog	October
1143	C22057	Louisiana	LA	22	Lafourche	Parish	22057	DA	Y	Y	N	N	GIWW, Bayou Lafourche	Lit	Metrological	Enviromental	Marine Fog	December
17	C01033	Alabama	AL	01	Colbert	County	01033	DA	Y	N	N	N	Tennessee	Lit	Maritime	Equity	Recreational Boating	June
17	C01033	Alabama	AL	01	Colbert	County	01033	DA	Y	N	N	N	Tennessee	Lit	Maritime	Equity	Recreational Boating	July
17	C01033	Alabama	AL	01	Colbert	County	01033	DA	Y	N	N	N	Tennessee	Lit	Maritime	Equity	Recreational Boating	August
17	C01033	Alabama	AL	01	Colbert	County	01033	DA	Y	N	N	N	Tennessee	Lit	Maritime	Equity	Recreational Boating	September
1143	C22057	Louisiana	LA	22	Lafourche	Parish	22057	DA	Y	Y	N	N	GIWW, Bayou Lafourche	Lit	Cultural	Equity	Mardi Gras	February	River works, but business closures
1143	C22057	Louisiana	LA	22	Lafourche	Parish	22057	EMC	Y	Y	N	N	GIWW, Bayou Lafourche	FEMA	Metrological	Enviromental	Cold Wave	March
1143	C22057	Louisiana	LA	22	Lafourche	Parish	22057	EMC	Y	Y	N	N	GIWW, Bayou Lafourche	FEMA	Non Seasonal	Enviromental	Volcano
1143	C22057	Louisiana	LA	22	Lafourche	Parish	22057	EMC	Y	Y	N	N	GIWW, Bayou Lafourche	FEMA	Non Seasonal	Enviromental	Earthquake
1143	C22057	Louisiana	LA	22	Lafourche	Parish	22057	EMC	Y	Y	N	N	GIWW, Bayou Lafourche	FEMA	Geotechnical	Enviromental	Avalanche
1143	C22057	Louisiana	LA	22	Lafourche	Parish	22057	EMC	Y	Y	N	N	GIWW, Bayou Lafourche	FEMA	Non Seasonal	Enviromental	Tsunami
1143	C22057	Louisiana	LA	22	Lafourche	Parish	22057	EMC	Y	Y	N	N	GIWW, Bayou Lafourche	FEMA	Metrological	Enviromental	Hail	February
1143	C22057	Louisiana	LA	22	Lafourche	Parish	22057	EMC	Y	Y	N	N	GIWW, Bayou Lafourche	FEMA	Metrological	Enviromental	Hail	March
1143	C22057	Louisiana	LA	22	Lafourche	Parish	22057	EMC	Y	Y	N	N	GIWW, Bayou Lafourche	FEMA	Metrological	Enviromental	Hail	April
1143	C22057	Louisiana	LA	22	Lafourche	Parish	22057	EMC	Y	Y	N	N	GIWW, Bayou Lafourche	FEMA	Metrological	Enviromental	Hail	May
1143	C22057	Louisiana	LA	22	Lafourche	Parish	22057	EMC	Y	Y	N	N	GIWW, Bayou Lafourche	FEMA	Metrological	Enviromental	Hail	June
1143	C22057	Louisiana	LA	22	Lafourche	Parish	22057	EMC	Y	Y	N	N	GIWW, Bayou Lafourche	FEMA	Ecological	Enviromental	Wildfire	December
1143	C22057	Louisiana	LA	22	Lafourche	Parish	22057	EMC	Y	Y	N	N	GIWW, Bayou Lafourche	FEMA	Ecological	Enviromental	Wildfire	February
1143	C22057	Louisiana	LA	22	Lafourche	Parish	22057	EMC	Y	Y	N	N	GIWW, Bayou Lafourche	FEMA	Ecological	Enviromental	Wildfire	January
1143	C22057	Louisiana	LA	22	Lafourche	Parish	22057	EMC	Y	Y	N	N	GIWW, Bayou Lafourche	FEMA	Ecological	Enviromental	Wildfire	March
1143	C22057	Louisiana	LA	22	Lafourche	Parish	22057	EMC	Y	Y	N	N	GIWW, Bayou Lafourche	FEMA	Ecological	Enviromental	Wildfire	November
1143	C22057	Louisiana	LA	22	Lafourche	Parish	22057	EMC	Y	Y	N	N	GIWW, Bayou Lafourche	FEMA	Ecological	Enviromental	Wildfire	September
1143	C22057	Louisiana	LA	22	Lafourche	Parish	22057	EMC	Y	Y	N	N	GIWW, Bayou Lafourche	FEMA	Ecological	Enviromental	Wildfire	April
1143	C22057	Louisiana	LA	22	Lafourche	Parish	22057	EMC	Y	Y	N	N	GIWW, Bayou Lafourche	FEMA	Ecological	Enviromental	Wildfire	October
1143	C22057	Louisiana	LA	22	Lafourche	Parish	22057	EMC	Y	Y	N	N	GIWW, Bayou Lafourche	FEMA	Fluvial	Enviromental	Coastal Flooding/Storm Surge	June
1143	C22057	Louisiana	LA	22	Lafourche	Parish	22057	EMC	Y	Y	N	N	GIWW, Bayou Lafourche	FEMA	Fluvial	Enviromental	Coastal Flooding/Storm Surge	July
1143	C22057	Louisiana	LA	22	Lafourche	Parish	22057	EMC	Y	Y	N	N	GIWW, Bayou Lafourche	FEMA	Fluvial	Enviromental	Coastal Flooding/Storm Surge	August
1143	C22057	Louisiana	LA	22	Lafourche	Parish	22057	EMC	Y	Y	N	N	GIWW, Bayou Lafourche	FEMA	Fluvial	Enviromental	Coastal Flooding/Storm Surge	September
1143	C22057	Louisiana	LA	22	Lafourche	Parish	22057	EMC	Y	Y	N	N	GIWW, Bayou Lafourche	FEMA	Fluvial	Enviromental	Coastal Flooding/Storm Surge	October
1137	C22045	Louisiana	LA	22	Iberia	Parish	22045	EMC	Y	Y	N	N	GIWW, Bayou Teche	FEMA	Metrological	Enviromental	Cold Wave	November
1137	C22045	Louisiana	LA	22	Iberia	Parish	22045	EMC	Y	Y	N	N	GIWW, Bayou Teche	FEMA	Metrological	Enviromental	Cold Wave	December
1137	C22045	Louisiana	LA	22	Iberia	Parish	22045	EMC	Y	Y	N	N	GIWW, Bayou Teche	FEMA	Metrological	Enviromental	Cold Wave	January
1137	C22045	Louisiana	LA	22	Iberia	Parish	22045	EMC	Y	Y	N	N	GIWW, Bayou Teche	FEMA	Metrological	Enviromental	Cold Wave	February
1137	C22045	Louisiana	LA	22	Iberia	Parish	22045	EMC	Y	Y	N	N	GIWW, Bayou Teche	FEMA	Metrological	Enviromental	Winter Weather	November
1137	C22045	Louisiana	LA	22	Iberia	Parish	22045	EMC	Y	Y	N	N	GIWW, Bayou Teche	FEMA	Metrological	Enviromental	Winter Weather	December
1137	C22045	Louisiana	LA	22	Iberia	Parish	22045	EMC	Y	Y	N	N	GIWW, Bayou Teche	FEMA	Metrological	Enviromental	Winter Weather	January
1137	C22045	Louisiana	LA	22	Iberia	Parish	22045	EMC	Y	Y	N	N	GIWW, Bayou Teche	FEMA	Metrological	Enviromental	Winter Weather	February
1137	C22045	Louisiana	LA	22	Iberia	Parish	22045	EMC	Y	Y	N	N	GIWW, Bayou Teche	FEMA	Metrological	Enviromental	Winter Weather	March
1137	C22045	Louisiana	LA	22	Iberia	Parish	22045	EMC	Y	Y	N	N	GIWW, Bayou Teche	FEMA	Metrological	Enviromental	Hurricane	November
1137	C22045	Louisiana	LA	22	Iberia	Parish	22045	EMC	Y	Y	N	N	GIWW, Bayou Teche	FEMA	Metrological	Enviromental	Hurricane	June
1137	C22045	Louisiana	LA	22	Iberia	Parish	22045	EMC	Y	Y	N	N	GIWW, Bayou Teche	FEMA	Metrological	Enviromental	Hurricane	July
1137	C22045	Louisiana	LA	22	Iberia	Parish	22045	EMC	Y	Y	N	N	GIWW, Bayou Teche	FEMA	Metrological	Enviromental	Hurricane	August
1137	C22045	Louisiana	LA	22	Iberia	Parish	22045	EMC	Y	Y	N	N	GIWW, Bayou Teche	FEMA	Metrological	Enviromental	Hurricane	September
1137	C22045	Louisiana	LA	22	Iberia	Parish	22045	EMC	Y	Y	N	N	GIWW, Bayou Teche	FEMA	Metrological	Enviromental	Hurricane	October
1137	C22045	Louisiana	LA	22	Iberia	Parish	22045	BC	Y	Y	N	N	GIWW, Bayou Teche	Lit	Ecological	Enviromental	Termite Swarm	May	localized heavy swarms at night
1137	C22045	Louisiana	LA	22	Iberia	Parish	22045	DA	Y	Y	N	N	GIWW, Bayou Teche	Lit	Metrological	Enviromental	Marine Fog	November
1137	C22045	Louisiana	LA	22	Iberia	Parish	22045	DA	Y	Y	N	N	GIWW, Bayou Teche	Lit	Metrological	Enviromental	Marine Fog	January
1137	C22045	Louisiana	LA	22	Iberia	Parish	22045	DA	Y	Y	N	N	GIWW, Bayou Teche	Lit	Metrological	Enviromental	Marine Fog	February
1137	C22045	Louisiana	LA	22	Iberia	Parish	22045	DA	Y	Y	N	N	GIWW, Bayou Teche	Lit	Metrological	Enviromental	Marine Fog	March
1137	C22045	Louisiana	LA	22	Iberia	Parish	22045	DA	Y	Y	N	N	GIWW, Bayou Teche	Lit	Metrological	Enviromental	Marine Fog	October
1137	C22045	Louisiana	LA	22	Iberia	Parish	22045	DA	Y	Y	N	N	GIWW, Bayou Teche	Lit	Metrological	Enviromental	Marine Fog	December
17	C01033	Alabama	AL	01	Colbert	County	01033	DA	Y	N	N	N	Tennessee	Lit	Maritime	Equity	Recreational Boating	May
18	C01035	Alabama	AL	01	Conecuh	County	01035	EMC	N	N	N	N		FEMA	Metrological	Enviromental	Heat Wave	June
18	C01035	Alabama	AL	01	Conecuh	County	01035	EMC	N	N	N	N		FEMA	Metrological	Enviromental	Heat Wave	July
18	C01035	Alabama	AL	01	Conecuh	County	01035	EMC	N	N	N	N		FEMA	Metrological	Enviromental	Heat Wave	August
1137	C22045	Louisiana	LA	22	Iberia	Parish	22045	DA	Y	Y	N	N	GIWW, Bayou Teche	Lit	Cultural	Equity	Mardi Gras	February	River works, but business closures
1137	C22045	Louisiana	LA	22	Iberia	Parish	22045	EMC	Y	Y	N	N	GIWW, Bayou Teche	FEMA	Metrological	Enviromental	Cold Wave	March
1137	C22045	Louisiana	LA	22	Iberia	Parish	22045	EMC	Y	Y	N	N	GIWW, Bayou Teche	FEMA	Non Seasonal	Enviromental	Volcano
1137	C22045	Louisiana	LA	22	Iberia	Parish	22045	EMC	Y	Y	N	N	GIWW, Bayou Teche	FEMA	Non Seasonal	Enviromental	Earthquake
1137	C22045	Louisiana	LA	22	Iberia	Parish	22045	EMC	Y	Y	N	N	GIWW, Bayou Teche	FEMA	Geotechnical	Enviromental	Avalanche
1137	C22045	Louisiana	LA	22	Iberia	Parish	22045	EMC	Y	Y	N	N	GIWW, Bayou Teche	FEMA	Non Seasonal	Enviromental	Tsunami
1137	C22045	Louisiana	LA	22	Iberia	Parish	22045	EMC	Y	Y	N	N	GIWW, Bayou Teche	FEMA	Metrological	Enviromental	Hail	February
1137	C22045	Louisiana	LA	22	Iberia	Parish	22045	EMC	Y	Y	N	N	GIWW, Bayou Teche	FEMA	Metrological	Enviromental	Hail	March
1137	C22045	Louisiana	LA	22	Iberia	Parish	22045	EMC	Y	Y	N	N	GIWW, Bayou Teche	FEMA	Metrological	Enviromental	Hail	April
1137	C22045	Louisiana	LA	22	Iberia	Parish	22045	EMC	Y	Y	N	N	GIWW, Bayou Teche	FEMA	Metrological	Enviromental	Hail	May
1137	C22045	Louisiana	LA	22	Iberia	Parish	22045	EMC	Y	Y	N	N	GIWW, Bayou Teche	FEMA	Metrological	Enviromental	Hail	June
1137	C22045	Louisiana	LA	22	Iberia	Parish	22045	EMC	Y	Y	N	N	GIWW, Bayou Teche	FEMA	Ecological	Enviromental	Wildfire	December
1137	C22045	Louisiana	LA	22	Iberia	Parish	22045	EMC	Y	Y	N	N	GIWW, Bayou Teche	FEMA	Ecological	Enviromental	Wildfire	February
1137	C22045	Louisiana	LA	22	Iberia	Parish	22045	EMC	Y	Y	N	N	GIWW, Bayou Teche	FEMA	Ecological	Enviromental	Wildfire	January
1137	C22045	Louisiana	LA	22	Iberia	Parish	22045	EMC	Y	Y	N	N	GIWW, Bayou Teche	FEMA	Ecological	Enviromental	Wildfire	March
1137	C22045	Louisiana	LA	22	Iberia	Parish	22045	EMC	Y	Y	N	N	GIWW, Bayou Teche	FEMA	Ecological	Enviromental	Wildfire	November
1137	C22045	Louisiana	LA	22	Iberia	Parish	22045	EMC	Y	Y	N	N	GIWW, Bayou Teche	FEMA	Ecological	Enviromental	Wildfire	September
1137	C22045	Louisiana	LA	22	Iberia	Parish	22045	EMC	Y	Y	N	N	GIWW, Bayou Teche	FEMA	Ecological	Enviromental	Wildfire	April
1137	C22045	Louisiana	LA	22	Iberia	Parish	22045	EMC	Y	Y	N	N	GIWW, Bayou Teche	FEMA	Ecological	Enviromental	Wildfire	October
1137	C22045	Louisiana	LA	22	Iberia	Parish	22045	EMC	Y	Y	N	N	GIWW, Bayou Teche	FEMA	Fluvial	Enviromental	Coastal Flooding/Storm Surge	June
1137	C22045	Louisiana	LA	22	Iberia	Parish	22045	EMC	Y	Y	N	N	GIWW, Bayou Teche	FEMA	Fluvial	Enviromental	Coastal Flooding/Storm Surge	July
1137	C22045	Louisiana	LA	22	Iberia	Parish	22045	EMC	Y	Y	N	N	GIWW, Bayou Teche	FEMA	Fluvial	Enviromental	Coastal Flooding/Storm Surge	August
1137	C22045	Louisiana	LA	22	Iberia	Parish	22045	EMC	Y	Y	N	N	GIWW, Bayou Teche	FEMA	Fluvial	Enviromental	Coastal Flooding/Storm Surge	September
1137	C22045	Louisiana	LA	22	Iberia	Parish	22045	EMC	Y	Y	N	N	GIWW, Bayou Teche	FEMA	Fluvial	Enviromental	Coastal Flooding/Storm Surge	October
1164	C22099	Louisiana	LA	22	St. Martin	Parish	22099	EMC	Y	Y	N	Y	GIWW, Bayou Teche	FEMA	Metrological	Enviromental	Cold Wave	November
1164	C22099	Louisiana	LA	22	St. Martin	Parish	22099	EMC	Y	Y	N	Y	GIWW, Bayou Teche	FEMA	Metrological	Enviromental	Cold Wave	December
1164	C22099	Louisiana	LA	22	St. Martin	Parish	22099	EMC	Y	Y	N	Y	GIWW, Bayou Teche	FEMA	Metrological	Enviromental	Cold Wave	January
1164	C22099	Louisiana	LA	22	St. Martin	Parish	22099	EMC	Y	Y	N	Y	GIWW, Bayou Teche	FEMA	Metrological	Enviromental	Cold Wave	February
1164	C22099	Louisiana	LA	22	St. Martin	Parish	22099	EMC	Y	Y	N	Y	GIWW, Bayou Teche	FEMA	Metrological	Enviromental	Winter Weather	November
1164	C22099	Louisiana	LA	22	St. Martin	Parish	22099	EMC	Y	Y	N	Y	GIWW, Bayou Teche	FEMA	Metrological	Enviromental	Winter Weather	December
1164	C22099	Louisiana	LA	22	St. Martin	Parish	22099	EMC	Y	Y	N	Y	GIWW, Bayou Teche	FEMA	Metrological	Enviromental	Winter Weather	January
1164	C22099	Louisiana	LA	22	St. Martin	Parish	22099	EMC	Y	Y	N	Y	GIWW, Bayou Teche	FEMA	Metrological	Enviromental	Winter Weather	February
1164	C22099	Louisiana	LA	22	St. Martin	Parish	22099	EMC	Y	Y	N	Y	GIWW, Bayou Teche	FEMA	Metrological	Enviromental	Winter Weather	March
1164	C22099	Louisiana	LA	22	St. Martin	Parish	22099	EMC	Y	Y	N	Y	GIWW, Bayou Teche	FEMA	Metrological	Enviromental	Hurricane	November
1164	C22099	Louisiana	LA	22	St. Martin	Parish	22099	EMC	Y	Y	N	Y	GIWW, Bayou Teche	FEMA	Metrological	Enviromental	Hurricane	June
1164	C22099	Louisiana	LA	22	St. Martin	Parish	22099	EMC	Y	Y	N	Y	GIWW, Bayou Teche	FEMA	Metrological	Enviromental	Hurricane	July
1164	C22099	Louisiana	LA	22	St. Martin	Parish	22099	EMC	Y	Y	N	Y	GIWW, Bayou Teche	FEMA	Metrological	Enviromental	Hurricane	August
1164	C22099	Louisiana	LA	22	St. Martin	Parish	22099	EMC	Y	Y	N	Y	GIWW, Bayou Teche	FEMA	Metrological	Enviromental	Hurricane	September
1164	C22099	Louisiana	LA	22	St. Martin	Parish	22099	EMC	Y	Y	N	Y	GIWW, Bayou Teche	FEMA	Metrological	Enviromental	Hurricane	October
1164	C22099	Louisiana	LA	22	St. Martin	Parish	22099	BC	Y	Y	N	Y	GIWW, Bayou Teche	Lit	Ecological	Enviromental	Termite Swarm	May	localized heavy swarms at night
1164	C22099	Louisiana	LA	22	St. Martin	Parish	22099	DA	Y	Y	N	Y	GIWW, Bayou Teche	Lit	Metrological	Enviromental	Marine Fog	November
1164	C22099	Louisiana	LA	22	St. Martin	Parish	22099	DA	Y	Y	N	Y	GIWW, Bayou Teche	Lit	Metrological	Enviromental	Marine Fog	January
1164	C22099	Louisiana	LA	22	St. Martin	Parish	22099	DA	Y	Y	N	Y	GIWW, Bayou Teche	Lit	Metrological	Enviromental	Marine Fog	February
1164	C22099	Louisiana	LA	22	St. Martin	Parish	22099	DA	Y	Y	N	Y	GIWW, Bayou Teche	Lit	Metrological	Enviromental	Marine Fog	March
1164	C22099	Louisiana	LA	22	St. Martin	Parish	22099	DA	Y	Y	N	Y	GIWW, Bayou Teche	Lit	Metrological	Enviromental	Marine Fog	October
1164	C22099	Louisiana	LA	22	St. Martin	Parish	22099	DA	Y	Y	N	Y	GIWW, Bayou Teche	Lit	Metrological	Enviromental	Marine Fog	December
18	C01035	Alabama	AL	01	Conecuh	County	01035	EMC	N	N	N	N		FEMA	Metrological	Enviromental	Heat Wave	September
19	C01037	Alabama	AL	01	Coosa	County	01037	EMC	N	N	N	N		FEMA	Metrological	Enviromental	Heat Wave	June
19	C01037	Alabama	AL	01	Coosa	County	01037	EMC	N	N	N	N		FEMA	Metrological	Enviromental	Heat Wave	July
19	C01037	Alabama	AL	01	Coosa	County	01037	EMC	N	N	N	N		FEMA	Metrological	Enviromental	Heat Wave	August
1164	C22099	Louisiana	LA	22	St. Martin	Parish	22099	DA	Y	Y	N	Y	GIWW, Bayou Teche	Lit	Cultural	Equity	Mardi Gras	February	River works, but business closures
1164	C22099	Louisiana	LA	22	St. Martin	Parish	22099	EMC	Y	Y	N	Y	GIWW, Bayou Teche	FEMA	Metrological	Enviromental	Cold Wave	March
1164	C22099	Louisiana	LA	22	St. Martin	Parish	22099	EMC	Y	Y	N	Y	GIWW, Bayou Teche	FEMA	Non Seasonal	Enviromental	Volcano
1164	C22099	Louisiana	LA	22	St. Martin	Parish	22099	EMC	Y	Y	N	Y	GIWW, Bayou Teche	FEMA	Non Seasonal	Enviromental	Earthquake
1164	C22099	Louisiana	LA	22	St. Martin	Parish	22099	EMC	Y	Y	N	Y	GIWW, Bayou Teche	FEMA	Geotechnical	Enviromental	Avalanche
1164	C22099	Louisiana	LA	22	St. Martin	Parish	22099	EMC	Y	Y	N	Y	GIWW, Bayou Teche	FEMA	Non Seasonal	Enviromental	Tsunami
1164	C22099	Louisiana	LA	22	St. Martin	Parish	22099	EMC	Y	Y	N	Y	GIWW, Bayou Teche	FEMA	Metrological	Enviromental	Hail	February
1164	C22099	Louisiana	LA	22	St. Martin	Parish	22099	EMC	Y	Y	N	Y	GIWW, Bayou Teche	FEMA	Metrological	Enviromental	Hail	March
1164	C22099	Louisiana	LA	22	St. Martin	Parish	22099	EMC	Y	Y	N	Y	GIWW, Bayou Teche	FEMA	Metrological	Enviromental	Hail	April
1164	C22099	Louisiana	LA	22	St. Martin	Parish	22099	EMC	Y	Y	N	Y	GIWW, Bayou Teche	FEMA	Metrological	Enviromental	Hail	May
1164	C22099	Louisiana	LA	22	St. Martin	Parish	22099	EMC	Y	Y	N	Y	GIWW, Bayou Teche	FEMA	Metrological	Enviromental	Hail	June
1164	C22099	Louisiana	LA	22	St. Martin	Parish	22099	EMC	Y	Y	N	Y	GIWW, Bayou Teche	FEMA	Ecological	Enviromental	Wildfire	December
1164	C22099	Louisiana	LA	22	St. Martin	Parish	22099	EMC	Y	Y	N	Y	GIWW, Bayou Teche	FEMA	Ecological	Enviromental	Wildfire	February
1164	C22099	Louisiana	LA	22	St. Martin	Parish	22099	EMC	Y	Y	N	Y	GIWW, Bayou Teche	FEMA	Ecological	Enviromental	Wildfire	January
1164	C22099	Louisiana	LA	22	St. Martin	Parish	22099	EMC	Y	Y	N	Y	GIWW, Bayou Teche	FEMA	Ecological	Enviromental	Wildfire	March
1164	C22099	Louisiana	LA	22	St. Martin	Parish	22099	EMC	Y	Y	N	Y	GIWW, Bayou Teche	FEMA	Ecological	Enviromental	Wildfire	November
1164	C22099	Louisiana	LA	22	St. Martin	Parish	22099	EMC	Y	Y	N	Y	GIWW, Bayou Teche	FEMA	Ecological	Enviromental	Wildfire	September
1164	C22099	Louisiana	LA	22	St. Martin	Parish	22099	EMC	Y	Y	N	Y	GIWW, Bayou Teche	FEMA	Ecological	Enviromental	Wildfire	April
1164	C22099	Louisiana	LA	22	St. Martin	Parish	22099	EMC	Y	Y	N	Y	GIWW, Bayou Teche	FEMA	Ecological	Enviromental	Wildfire	October
1164	C22099	Louisiana	LA	22	St. Martin	Parish	22099	EMC	Y	Y	N	Y	GIWW, Bayou Teche	FEMA	Fluvial	Enviromental	Coastal Flooding/Storm Surge	June
1164	C22099	Louisiana	LA	22	St. Martin	Parish	22099	EMC	Y	Y	N	Y	GIWW, Bayou Teche	FEMA	Fluvial	Enviromental	Coastal Flooding/Storm Surge	July
1164	C22099	Louisiana	LA	22	St. Martin	Parish	22099	EMC	Y	Y	N	Y	GIWW, Bayou Teche	FEMA	Fluvial	Enviromental	Coastal Flooding/Storm Surge	August
1164	C22099	Louisiana	LA	22	St. Martin	Parish	22099	EMC	Y	Y	N	Y	GIWW, Bayou Teche	FEMA	Fluvial	Enviromental	Coastal Flooding/Storm Surge	September
1164	C22099	Louisiana	LA	22	St. Martin	Parish	22099	EMC	Y	Y	N	Y	GIWW, Bayou Teche	FEMA	Fluvial	Enviromental	Coastal Flooding/Storm Surge	October
1165	C22101	Louisiana	LA	22	St. Mary	Parish	22101	EMC	Y	Y	N	Y	GIWW, Bayou Teche	FEMA	Metrological	Enviromental	Cold Wave	November
1165	C22101	Louisiana	LA	22	St. Mary	Parish	22101	EMC	Y	Y	N	Y	GIWW, Bayou Teche	FEMA	Metrological	Enviromental	Cold Wave	December
1165	C22101	Louisiana	LA	22	St. Mary	Parish	22101	EMC	Y	Y	N	Y	GIWW, Bayou Teche	FEMA	Metrological	Enviromental	Cold Wave	January
1165	C22101	Louisiana	LA	22	St. Mary	Parish	22101	EMC	Y	Y	N	Y	GIWW, Bayou Teche	FEMA	Metrological	Enviromental	Cold Wave	February
1165	C22101	Louisiana	LA	22	St. Mary	Parish	22101	EMC	Y	Y	N	Y	GIWW, Bayou Teche	FEMA	Metrological	Enviromental	Winter Weather	November
1165	C22101	Louisiana	LA	22	St. Mary	Parish	22101	EMC	Y	Y	N	Y	GIWW, Bayou Teche	FEMA	Metrological	Enviromental	Winter Weather	December
1165	C22101	Louisiana	LA	22	St. Mary	Parish	22101	EMC	Y	Y	N	Y	GIWW, Bayou Teche	FEMA	Metrological	Enviromental	Winter Weather	January
1165	C22101	Louisiana	LA	22	St. Mary	Parish	22101	EMC	Y	Y	N	Y	GIWW, Bayou Teche	FEMA	Metrological	Enviromental	Winter Weather	February
1165	C22101	Louisiana	LA	22	St. Mary	Parish	22101	EMC	Y	Y	N	Y	GIWW, Bayou Teche	FEMA	Metrological	Enviromental	Winter Weather	March
1165	C22101	Louisiana	LA	22	St. Mary	Parish	22101	EMC	Y	Y	N	Y	GIWW, Bayou Teche	FEMA	Metrological	Enviromental	Hurricane	November
1165	C22101	Louisiana	LA	22	St. Mary	Parish	22101	EMC	Y	Y	N	Y	GIWW, Bayou Teche	FEMA	Metrological	Enviromental	Hurricane	June
1165	C22101	Louisiana	LA	22	St. Mary	Parish	22101	EMC	Y	Y	N	Y	GIWW, Bayou Teche	FEMA	Metrological	Enviromental	Hurricane	July
1165	C22101	Louisiana	LA	22	St. Mary	Parish	22101	EMC	Y	Y	N	Y	GIWW, Bayou Teche	FEMA	Metrological	Enviromental	Hurricane	August
1165	C22101	Louisiana	LA	22	St. Mary	Parish	22101	EMC	Y	Y	N	Y	GIWW, Bayou Teche	FEMA	Metrological	Enviromental	Hurricane	September
1165	C22101	Louisiana	LA	22	St. Mary	Parish	22101	EMC	Y	Y	N	Y	GIWW, Bayou Teche	FEMA	Metrological	Enviromental	Hurricane	October
1165	C22101	Louisiana	LA	22	St. Mary	Parish	22101	BC	Y	Y	N	Y	GIWW, Bayou Teche	Lit	Ecological	Enviromental	Termite Swarm	May	localized heavy swarms at night
1165	C22101	Louisiana	LA	22	St. Mary	Parish	22101	DA	Y	Y	N	Y	GIWW, Bayou Teche	Lit	Metrological	Enviromental	Marine Fog	November
1165	C22101	Louisiana	LA	22	St. Mary	Parish	22101	DA	Y	Y	N	Y	GIWW, Bayou Teche	Lit	Metrological	Enviromental	Marine Fog	January
1165	C22101	Louisiana	LA	22	St. Mary	Parish	22101	DA	Y	Y	N	Y	GIWW, Bayou Teche	Lit	Metrological	Enviromental	Marine Fog	February
1165	C22101	Louisiana	LA	22	St. Mary	Parish	22101	DA	Y	Y	N	Y	GIWW, Bayou Teche	Lit	Metrological	Enviromental	Marine Fog	March
1165	C22101	Louisiana	LA	22	St. Mary	Parish	22101	DA	Y	Y	N	Y	GIWW, Bayou Teche	Lit	Metrological	Enviromental	Marine Fog	October
1165	C22101	Louisiana	LA	22	St. Mary	Parish	22101	DA	Y	Y	N	Y	GIWW, Bayou Teche	Lit	Metrological	Enviromental	Marine Fog	December
19	C01037	Alabama	AL	01	Coosa	County	01037	EMC	N	N	N	N		FEMA	Metrological	Enviromental	Heat Wave	September
20	C01039	Alabama	AL	01	Covington	County	01039	EMC	N	N	N	N		FEMA	Metrological	Enviromental	Heat Wave	June
20	C01039	Alabama	AL	01	Covington	County	01039	EMC	N	N	N	N		FEMA	Metrological	Enviromental	Heat Wave	July
20	C01039	Alabama	AL	01	Covington	County	01039	EMC	N	N	N	N		FEMA	Metrological	Enviromental	Heat Wave	August
1165	C22101	Louisiana	LA	22	St. Mary	Parish	22101	DA	Y	Y	N	Y	GIWW, Bayou Teche	Lit	Cultural	Equity	Mardi Gras	February	River works, but business closures
1165	C22101	Louisiana	LA	22	St. Mary	Parish	22101	EMC	Y	Y	N	Y	GIWW, Bayou Teche	FEMA	Metrological	Enviromental	Cold Wave	March
1165	C22101	Louisiana	LA	22	St. Mary	Parish	22101	EMC	Y	Y	N	Y	GIWW, Bayou Teche	FEMA	Non Seasonal	Enviromental	Volcano
1165	C22101	Louisiana	LA	22	St. Mary	Parish	22101	EMC	Y	Y	N	Y	GIWW, Bayou Teche	FEMA	Non Seasonal	Enviromental	Earthquake
1165	C22101	Louisiana	LA	22	St. Mary	Parish	22101	EMC	Y	Y	N	Y	GIWW, Bayou Teche	FEMA	Geotechnical	Enviromental	Avalanche
1165	C22101	Louisiana	LA	22	St. Mary	Parish	22101	EMC	Y	Y	N	Y	GIWW, Bayou Teche	FEMA	Non Seasonal	Enviromental	Tsunami
1165	C22101	Louisiana	LA	22	St. Mary	Parish	22101	EMC	Y	Y	N	Y	GIWW, Bayou Teche	FEMA	Metrological	Enviromental	Hail	February
1165	C22101	Louisiana	LA	22	St. Mary	Parish	22101	EMC	Y	Y	N	Y	GIWW, Bayou Teche	FEMA	Metrological	Enviromental	Hail	March
1165	C22101	Louisiana	LA	22	St. Mary	Parish	22101	EMC	Y	Y	N	Y	GIWW, Bayou Teche	FEMA	Metrological	Enviromental	Hail	April
1165	C22101	Louisiana	LA	22	St. Mary	Parish	22101	EMC	Y	Y	N	Y	GIWW, Bayou Teche	FEMA	Metrological	Enviromental	Hail	May
1165	C22101	Louisiana	LA	22	St. Mary	Parish	22101	EMC	Y	Y	N	Y	GIWW, Bayou Teche	FEMA	Metrological	Enviromental	Hail	June
1165	C22101	Louisiana	LA	22	St. Mary	Parish	22101	EMC	Y	Y	N	Y	GIWW, Bayou Teche	FEMA	Ecological	Enviromental	Wildfire	December
1165	C22101	Louisiana	LA	22	St. Mary	Parish	22101	EMC	Y	Y	N	Y	GIWW, Bayou Teche	FEMA	Ecological	Enviromental	Wildfire	February
1165	C22101	Louisiana	LA	22	St. Mary	Parish	22101	EMC	Y	Y	N	Y	GIWW, Bayou Teche	FEMA	Ecological	Enviromental	Wildfire	January
1165	C22101	Louisiana	LA	22	St. Mary	Parish	22101	EMC	Y	Y	N	Y	GIWW, Bayou Teche	FEMA	Ecological	Enviromental	Wildfire	March
1165	C22101	Louisiana	LA	22	St. Mary	Parish	22101	EMC	Y	Y	N	Y	GIWW, Bayou Teche	FEMA	Ecological	Enviromental	Wildfire	November
1165	C22101	Louisiana	LA	22	St. Mary	Parish	22101	EMC	Y	Y	N	Y	GIWW, Bayou Teche	FEMA	Ecological	Enviromental	Wildfire	September
1165	C22101	Louisiana	LA	22	St. Mary	Parish	22101	EMC	Y	Y	N	Y	GIWW, Bayou Teche	FEMA	Ecological	Enviromental	Wildfire	April
1165	C22101	Louisiana	LA	22	St. Mary	Parish	22101	EMC	Y	Y	N	Y	GIWW, Bayou Teche	FEMA	Ecological	Enviromental	Wildfire	October
1165	C22101	Louisiana	LA	22	St. Mary	Parish	22101	EMC	Y	Y	N	Y	GIWW, Bayou Teche	FEMA	Fluvial	Enviromental	Coastal Flooding/Storm Surge	June
1165	C22101	Louisiana	LA	22	St. Mary	Parish	22101	EMC	Y	Y	N	Y	GIWW, Bayou Teche	FEMA	Fluvial	Enviromental	Coastal Flooding/Storm Surge	July
1165	C22101	Louisiana	LA	22	St. Mary	Parish	22101	EMC	Y	Y	N	Y	GIWW, Bayou Teche	FEMA	Fluvial	Enviromental	Coastal Flooding/Storm Surge	August
1165	C22101	Louisiana	LA	22	St. Mary	Parish	22101	EMC	Y	Y	N	Y	GIWW, Bayou Teche	FEMA	Fluvial	Enviromental	Coastal Flooding/Storm Surge	September
1165	C22101	Louisiana	LA	22	St. Mary	Parish	22101	EMC	Y	Y	N	Y	GIWW, Bayou Teche	FEMA	Fluvial	Enviromental	Coastal Flooding/Storm Surge	October
49	C01097	Alabama	AL	01	Mobile	County	01097	EMC	Y	Y	Y	N	GIWW, Black Warrior-Tombigbee	FEMA	Metrological	Enviromental	Cold Wave	November
49	C01097	Alabama	AL	01	Mobile	County	01097	EMC	Y	Y	Y	N	GIWW, Black Warrior-Tombigbee	FEMA	Metrological	Enviromental	Cold Wave	December
49	C01097	Alabama	AL	01	Mobile	County	01097	EMC	Y	Y	Y	N	GIWW, Black Warrior-Tombigbee	FEMA	Metrological	Enviromental	Cold Wave	January
49	C01097	Alabama	AL	01	Mobile	County	01097	EMC	Y	Y	Y	N	GIWW, Black Warrior-Tombigbee	FEMA	Metrological	Enviromental	Cold Wave	February
49	C01097	Alabama	AL	01	Mobile	County	01097	EMC	Y	Y	Y	N	GIWW, Black Warrior-Tombigbee	FEMA	Metrological	Enviromental	Winter Weather	November
49	C01097	Alabama	AL	01	Mobile	County	01097	EMC	Y	Y	Y	N	GIWW, Black Warrior-Tombigbee	FEMA	Metrological	Enviromental	Winter Weather	December
49	C01097	Alabama	AL	01	Mobile	County	01097	EMC	Y	Y	Y	N	GIWW, Black Warrior-Tombigbee	FEMA	Metrological	Enviromental	Winter Weather	January
49	C01097	Alabama	AL	01	Mobile	County	01097	EMC	Y	Y	Y	N	GIWW, Black Warrior-Tombigbee	FEMA	Metrological	Enviromental	Winter Weather	February
49	C01097	Alabama	AL	01	Mobile	County	01097	EMC	Y	Y	Y	N	GIWW, Black Warrior-Tombigbee	FEMA	Metrological	Enviromental	Winter Weather	March
49	C01097	Alabama	AL	01	Mobile	County	01097	EMC	Y	Y	Y	N	GIWW, Black Warrior-Tombigbee	FEMA	Metrological	Enviromental	Hurricane	November
49	C01097	Alabama	AL	01	Mobile	County	01097	EMC	Y	Y	Y	N	GIWW, Black Warrior-Tombigbee	FEMA	Metrological	Enviromental	Hurricane	June
49	C01097	Alabama	AL	01	Mobile	County	01097	EMC	Y	Y	Y	N	GIWW, Black Warrior-Tombigbee	FEMA	Metrological	Enviromental	Hurricane	July
49	C01097	Alabama	AL	01	Mobile	County	01097	EMC	Y	Y	Y	N	GIWW, Black Warrior-Tombigbee	FEMA	Metrological	Enviromental	Hurricane	August
49	C01097	Alabama	AL	01	Mobile	County	01097	EMC	Y	Y	Y	N	GIWW, Black Warrior-Tombigbee	FEMA	Metrological	Enviromental	Hurricane	September
49	C01097	Alabama	AL	01	Mobile	County	01097	EMC	Y	Y	Y	N	GIWW, Black Warrior-Tombigbee	FEMA	Metrological	Enviromental	Hurricane	October
20	C01039	Alabama	AL	01	Covington	County	01039	EMC	N	N	N	N		FEMA	Metrological	Enviromental	Heat Wave	September
21	C01041	Alabama	AL	01	Crenshaw	County	01041	EMC	N	N	N	N		FEMA	Metrological	Enviromental	Heat Wave	June
21	C01041	Alabama	AL	01	Crenshaw	County	01041	EMC	N	N	N	N		FEMA	Metrological	Enviromental	Heat Wave	July
21	C01041	Alabama	AL	01	Crenshaw	County	01041	EMC	N	N	N	N		FEMA	Metrological	Enviromental	Heat Wave	August
49	C01097	Alabama	AL	01	Mobile	County	01097	DA	Y	Y	Y	N	GIWW, Black Warrior-Tombigbee	Lit	Cultural	Equity	Mardi Gras	February	River works, but business closures
49	C01097	Alabama	AL	01	Mobile	County	01097	BC	Y	Y	Y	N	GIWW, Black Warrior-Tombigbee	Lit	Maritime	Economic	Vessel Cruises	April
50	C01098	Alabama	AL	01	Mobile	County	01097	BC	Y	Y	Y	N	GIWW, Black Warrior-Tombigbee	Lit	Maritime	Economic	Vessel Cruises	May
51	C01099	Alabama	AL	01	Mobile	County	01097	BC	Y	Y	Y	N	GIWW, Black Warrior-Tombigbee	Lit	Maritime	Economic	Vessel Cruises	June
52	C01100	Alabama	AL	01	Mobile	County	01097	BC	Y	Y	Y	N	GIWW, Black Warrior-Tombigbee	Lit	Maritime	Economic	Vessel Cruises	July
53	C01101	Alabama	AL	01	Mobile	County	01097	BC	Y	Y	Y	N	GIWW, Black Warrior-Tombigbee	Lit	Maritime	Economic	Vessel Cruises	August
54	C01102	Alabama	AL	01	Mobile	County	01097	BC	Y	Y	Y	N	GIWW, Black Warrior-Tombigbee	Lit	Maritime	Economic	Vessel Cruises	September
55	C01103	Alabama	AL	01	Mobile	County	01097	BC	Y	Y	Y	N	GIWW, Black Warrior-Tombigbee	Lit	Maritime	Economic	Vessel Cruises	October
49	C01097	Alabama	AL	01	Mobile	County	01097	BC	Y	Y	Y	N	GIWW, Black Warrior-Tombigbee	Lit	Maritime	Equity	Ferry	January	Mobile Bay Ferry
49	C01097	Alabama	AL	01	Mobile	County	01097	BC	Y	Y	Y	N	GIWW, Black Warrior-Tombigbee	Lit	Maritime	Equity	Ferry	February	Mobile Bay Ferry
49	C01097	Alabama	AL	01	Mobile	County	01097	BC	Y	Y	Y	N	GIWW, Black Warrior-Tombigbee	Lit	Maritime	Equity	Ferry	March	Mobile Bay Ferry
49	C01097	Alabama	AL	01	Mobile	County	01097	BC	Y	Y	Y	N	GIWW, Black Warrior-Tombigbee	Lit	Maritime	Equity	Ferry	June	Mobile Bay Ferry
49	C01097	Alabama	AL	01	Mobile	County	01097	BC	Y	Y	Y	N	GIWW, Black Warrior-Tombigbee	Lit	Maritime	Equity	Ferry	July	Mobile Bay Ferry
49	C01097	Alabama	AL	01	Mobile	County	01097	BC	Y	Y	Y	N	GIWW, Black Warrior-Tombigbee	Lit	Maritime	Equity	Ferry	August	Mobile Bay Ferry
49	C01097	Alabama	AL	01	Mobile	County	01097	BC	Y	Y	Y	N	GIWW, Black Warrior-Tombigbee	Lit	Maritime	Equity	Ferry	September	Mobile Bay Ferry
49	C01097	Alabama	AL	01	Mobile	County	01097	BC	Y	Y	Y	N	GIWW, Black Warrior-Tombigbee	Lit	Maritime	Equity	Ferry	October	Mobile Bay Ferry
49	C01097	Alabama	AL	01	Mobile	County	01097	BC	Y	Y	Y	N	GIWW, Black Warrior-Tombigbee	Lit	Maritime	Equity	Ferry	November	Mobile Bay Ferry
49	C01097	Alabama	AL	01	Mobile	County	01097	BC	Y	Y	Y	N	GIWW, Black Warrior-Tombigbee	Lit	Maritime	Equity	Ferry	December	Mobile Bay Ferry
49	C01097	Alabama	AL	01	Mobile	County	01097	EMC	Y	Y	Y	N	GIWW, Black Warrior-Tombigbee	FEMA	Metrological	Enviromental	Cold Wave	March
49	C01097	Alabama	AL	01	Mobile	County	01097	BC	Y	Y	Y	N	GIWW, Black Warrior-Tombigbee	Lit	Ecological	Enviromental	Termite Swarm	May	localized heavy swarms at night
49	C01097	Alabama	AL	01	Mobile	County	01097	EMC	Y	Y	Y	N	GIWW, Black Warrior-Tombigbee	FEMA	Non Seasonal	Enviromental	Volcano
49	C01097	Alabama	AL	01	Mobile	County	01097	EMC	Y	Y	Y	N	GIWW, Black Warrior-Tombigbee	FEMA	Non Seasonal	Enviromental	Earthquake
49	C01097	Alabama	AL	01	Mobile	County	01097	EMC	Y	Y	Y	N	GIWW, Black Warrior-Tombigbee	FEMA	Geotechnical	Enviromental	Avalanche
49	C01097	Alabama	AL	01	Mobile	County	01097	EMC	Y	Y	Y	N	GIWW, Black Warrior-Tombigbee	FEMA	Non Seasonal	Enviromental	Tsunami
49	C01097	Alabama	AL	01	Mobile	County	01097	BC	Y	Y	Y	N	GIWW, Black Warrior-Tombigbee	Lit	Maritime	Economic	Inbound Containers	August	Inbound Containers
49	C01097	Alabama	AL	01	Mobile	County	01097	BC	Y	Y	Y	N	GIWW, Black Warrior-Tombigbee	Lit	Maritime	Economic	Inbound Containers	September	Inbound Containers
49	C01097	Alabama	AL	01	Mobile	County	01097	BC	Y	Y	Y	N	GIWW, Black Warrior-Tombigbee	Lit	Maritime	Economic	Inbound Containers	October	Inbound Containers
49	C01097	Alabama	AL	01	Mobile	County	01097	BC	Y	Y	Y	N	GIWW, Black Warrior-Tombigbee	Lit	Maritime	Equity	Ferry	May	Mobile Bay Ferry
49	C01097	Alabama	AL	01	Mobile	County	01097	BC	Y	Y	Y	N	GIWW, Black Warrior-Tombigbee	Lit	Maritime	Equity	Ferry	April	Mobile Bay Ferry
49	C01097	Alabama	AL	01	Mobile	County	01097	EMC	Y	Y	Y	N	GIWW, Black Warrior-Tombigbee	FEMA	Metrological	Enviromental	Hail	February
49	C01097	Alabama	AL	01	Mobile	County	01097	EMC	Y	Y	Y	N	GIWW, Black Warrior-Tombigbee	FEMA	Metrological	Enviromental	Hail	March
49	C01097	Alabama	AL	01	Mobile	County	01097	EMC	Y	Y	Y	N	GIWW, Black Warrior-Tombigbee	FEMA	Metrological	Enviromental	Hail	April
49	C01097	Alabama	AL	01	Mobile	County	01097	EMC	Y	Y	Y	N	GIWW, Black Warrior-Tombigbee	FEMA	Metrological	Enviromental	Hail	May
49	C01097	Alabama	AL	01	Mobile	County	01097	SC	Y	Y	Y	N	GIWW, Black Warrior-Tombigbee	Lit	Ecological	Equity	FSMC (Moth)	August	For Flighted Spony Moth, Vessels Arriving from Far East
49	C01097	Alabama	AL	01	Mobile	County	01097	SC	Y	Y	Y	N	GIWW, Black Warrior-Tombigbee	Lit	Ecological	Equity	FSMC (Moth)	July	For Flighted Spony Moth, Vessels Arriving from Far East
49	C01097	Alabama	AL	01	Mobile	County	01097	SC	Y	Y	Y	N	GIWW, Black Warrior-Tombigbee	Lit	Ecological	Equity	FSMC (Moth)	June	For Flighted Spony Moth, Vessels Arriving from Far East
49	C01097	Alabama	AL	01	Mobile	County	01097	SC	Y	Y	Y	N	GIWW, Black Warrior-Tombigbee	Lit	Ecological	Equity	FSMC (Moth)	October	For Flighted Spony Moth, Vessels Arriving from Far East
49	C01097	Alabama	AL	01	Mobile	County	01097	SC	Y	Y	Y	N	GIWW, Black Warrior-Tombigbee	Lit	Ecological	Equity	FSMC (Moth)	September	For Flighted Spony Moth, Vessels Arriving from Far East
49	C01097	Alabama	AL	01	Mobile	County	01097	SC	Y	Y	Y	N	GIWW, Black Warrior-Tombigbee	Lit	Ecological	Equity	FSMC (Moth)	May	For Flighted Spony Moth, Vessels Arriving from Far East
49	C01097	Alabama	AL	01	Mobile	County	01097	EMC	Y	Y	Y	N	GIWW, Black Warrior-Tombigbee	FEMA	Ecological	Enviromental	Wildfire	December
49	C01097	Alabama	AL	01	Mobile	County	01097	EMC	Y	Y	Y	N	GIWW, Black Warrior-Tombigbee	FEMA	Ecological	Enviromental	Wildfire	February
49	C01097	Alabama	AL	01	Mobile	County	01097	EMC	Y	Y	Y	N	GIWW, Black Warrior-Tombigbee	FEMA	Ecological	Enviromental	Wildfire	January
49	C01097	Alabama	AL	01	Mobile	County	01097	EMC	Y	Y	Y	N	GIWW, Black Warrior-Tombigbee	FEMA	Ecological	Enviromental	Wildfire	March
49	C01097	Alabama	AL	01	Mobile	County	01097	EMC	Y	Y	Y	N	GIWW, Black Warrior-Tombigbee	FEMA	Ecological	Enviromental	Wildfire	November
49	C01097	Alabama	AL	01	Mobile	County	01097	EMC	Y	Y	Y	N	GIWW, Black Warrior-Tombigbee	FEMA	Ecological	Enviromental	Wildfire	September
49	C01097	Alabama	AL	01	Mobile	County	01097	EMC	Y	Y	Y	N	GIWW, Black Warrior-Tombigbee	FEMA	Ecological	Enviromental	Wildfire	April
49	C01097	Alabama	AL	01	Mobile	County	01097	EMC	Y	Y	Y	N	GIWW, Black Warrior-Tombigbee	FEMA	Ecological	Enviromental	Wildfire	October
49	C01097	Alabama	AL	01	Mobile	County	01097	EMC	Y	Y	Y	N	GIWW, Black Warrior-Tombigbee	FEMA	Fluvial	Enviromental	Coastal Flooding/Storm Surge	June
49	C01097	Alabama	AL	01	Mobile	County	01097	EMC	Y	Y	Y	N	GIWW, Black Warrior-Tombigbee	FEMA	Fluvial	Enviromental	Coastal Flooding/Storm Surge	July
49	C01097	Alabama	AL	01	Mobile	County	01097	EMC	Y	Y	Y	N	GIWW, Black Warrior-Tombigbee	FEMA	Fluvial	Enviromental	Coastal Flooding/Storm Surge	August
49	C01097	Alabama	AL	01	Mobile	County	01097	EMC	Y	Y	Y	N	GIWW, Black Warrior-Tombigbee	FEMA	Fluvial	Enviromental	Coastal Flooding/Storm Surge	September
49	C01097	Alabama	AL	01	Mobile	County	01097	EMC	Y	Y	Y	N	GIWW, Black Warrior-Tombigbee	FEMA	Fluvial	Enviromental	Coastal Flooding/Storm Surge	October
49	C01097	Alabama	AL	01	Mobile	County	01097	EMC	Y	Y	Y	N	GIWW, Black Warrior-Tombigbee	FEMA	Metrological	Enviromental	Hail	June
1124	C22019	Louisiana	LA	22	Calcasieu	Parish	22019	EMC	Y	Y	Y	Y	GIWW, Calcasieu	FEMA	Metrological	Enviromental	Cold Wave	November
1124	C22019	Louisiana	LA	22	Calcasieu	Parish	22019	EMC	Y	Y	Y	Y	GIWW, Calcasieu	FEMA	Metrological	Enviromental	Cold Wave	December
1124	C22019	Louisiana	LA	22	Calcasieu	Parish	22019	EMC	Y	Y	Y	Y	GIWW, Calcasieu	FEMA	Metrological	Enviromental	Cold Wave	January
1124	C22019	Louisiana	LA	22	Calcasieu	Parish	22019	EMC	Y	Y	Y	Y	GIWW, Calcasieu	FEMA	Metrological	Enviromental	Cold Wave	February
1124	C22019	Louisiana	LA	22	Calcasieu	Parish	22019	EMC	Y	Y	Y	Y	GIWW, Calcasieu	FEMA	Metrological	Enviromental	Winter Weather	November
1124	C22019	Louisiana	LA	22	Calcasieu	Parish	22019	EMC	Y	Y	Y	Y	GIWW, Calcasieu	FEMA	Metrological	Enviromental	Winter Weather	December
1124	C22019	Louisiana	LA	22	Calcasieu	Parish	22019	EMC	Y	Y	Y	Y	GIWW, Calcasieu	FEMA	Metrological	Enviromental	Winter Weather	January
1124	C22019	Louisiana	LA	22	Calcasieu	Parish	22019	EMC	Y	Y	Y	Y	GIWW, Calcasieu	FEMA	Metrological	Enviromental	Winter Weather	February
1124	C22019	Louisiana	LA	22	Calcasieu	Parish	22019	EMC	Y	Y	Y	Y	GIWW, Calcasieu	FEMA	Metrological	Enviromental	Winter Weather	March
1124	C22019	Louisiana	LA	22	Calcasieu	Parish	22019	EMC	Y	Y	Y	Y	GIWW, Calcasieu	FEMA	Metrological	Enviromental	Hurricane	November
1124	C22019	Louisiana	LA	22	Calcasieu	Parish	22019	EMC	Y	Y	Y	Y	GIWW, Calcasieu	FEMA	Metrological	Enviromental	Hurricane	June
1124	C22019	Louisiana	LA	22	Calcasieu	Parish	22019	EMC	Y	Y	Y	Y	GIWW, Calcasieu	FEMA	Metrological	Enviromental	Hurricane	July
1124	C22019	Louisiana	LA	22	Calcasieu	Parish	22019	EMC	Y	Y	Y	Y	GIWW, Calcasieu	FEMA	Metrological	Enviromental	Hurricane	August
1124	C22019	Louisiana	LA	22	Calcasieu	Parish	22019	EMC	Y	Y	Y	Y	GIWW, Calcasieu	FEMA	Metrological	Enviromental	Hurricane	September
1124	C22019	Louisiana	LA	22	Calcasieu	Parish	22019	EMC	Y	Y	Y	Y	GIWW, Calcasieu	FEMA	Metrological	Enviromental	Hurricane	October
1124	C22019	Louisiana	LA	22	Calcasieu	Parish	22019	BC	Y	Y	Y	Y	GIWW, Calcasieu	Lit	Ecological	Enviromental	Termite Swarm	May	localized heavy swarms at night
1124	C22019	Louisiana	LA	22	Calcasieu	Parish	22019	DA	Y	Y	Y	Y	GIWW, Calcasieu	Lit	Metrological	Enviromental	Marine Fog	November
1124	C22019	Louisiana	LA	22	Calcasieu	Parish	22019	DA	Y	Y	Y	Y	GIWW, Calcasieu	Lit	Metrological	Enviromental	Marine Fog	January
1124	C22019	Louisiana	LA	22	Calcasieu	Parish	22019	DA	Y	Y	Y	Y	GIWW, Calcasieu	Lit	Metrological	Enviromental	Marine Fog	February
1124	C22019	Louisiana	LA	22	Calcasieu	Parish	22019	DA	Y	Y	Y	Y	GIWW, Calcasieu	Lit	Metrological	Enviromental	Marine Fog	March
1124	C22019	Louisiana	LA	22	Calcasieu	Parish	22019	DA	Y	Y	Y	Y	GIWW, Calcasieu	Lit	Metrological	Enviromental	Marine Fog	October
1124	C22019	Louisiana	LA	22	Calcasieu	Parish	22019	DA	Y	Y	Y	Y	GIWW, Calcasieu	Lit	Metrological	Enviromental	Marine Fog	December
21	C01041	Alabama	AL	01	Crenshaw	County	01041	EMC	N	N	N	N		FEMA	Metrological	Enviromental	Heat Wave	September
22	C01043	Alabama	AL	01	Cullman	County	01043	EMC	N	N	N	N		FEMA	Metrological	Enviromental	Heat Wave	June
22	C01043	Alabama	AL	01	Cullman	County	01043	EMC	N	N	N	N		FEMA	Metrological	Enviromental	Heat Wave	July
22	C01043	Alabama	AL	01	Cullman	County	01043	EMC	N	N	N	N		FEMA	Metrological	Enviromental	Heat Wave	August
1124	C22019	Louisiana	LA	22	Calcasieu	Parish	22019	DA	Y	Y	Y	Y	GIWW, Calcasieu	Lit	Cultural	Equity	Mardi Gras	February	River works, but business closures
1124	C22019	Louisiana	LA	22	Calcasieu	Parish	22019	EMC	Y	Y	Y	Y	GIWW, Calcasieu	FEMA	Metrological	Enviromental	Cold Wave	March
1124	C22019	Louisiana	LA	22	Calcasieu	Parish	22019	EMC	Y	Y	Y	Y	GIWW, Calcasieu	FEMA	Non Seasonal	Enviromental	Volcano
1124	C22019	Louisiana	LA	22	Calcasieu	Parish	22019	EMC	Y	Y	Y	Y	GIWW, Calcasieu	FEMA	Non Seasonal	Enviromental	Earthquake
1124	C22019	Louisiana	LA	22	Calcasieu	Parish	22019	EMC	Y	Y	Y	Y	GIWW, Calcasieu	FEMA	Geotechnical	Enviromental	Avalanche
1124	C22019	Louisiana	LA	22	Calcasieu	Parish	22019	EMC	Y	Y	Y	Y	GIWW, Calcasieu	FEMA	Non Seasonal	Enviromental	Tsunami
1124	C22019	Louisiana	LA	22	Calcasieu	Parish	22019	EMC	Y	Y	Y	Y	GIWW, Calcasieu	FEMA	Metrological	Enviromental	Hail	February
1124	C22019	Louisiana	LA	22	Calcasieu	Parish	22019	EMC	Y	Y	Y	Y	GIWW, Calcasieu	FEMA	Metrological	Enviromental	Hail	March
1124	C22019	Louisiana	LA	22	Calcasieu	Parish	22019	EMC	Y	Y	Y	Y	GIWW, Calcasieu	FEMA	Metrological	Enviromental	Hail	April
1124	C22019	Louisiana	LA	22	Calcasieu	Parish	22019	EMC	Y	Y	Y	Y	GIWW, Calcasieu	FEMA	Metrological	Enviromental	Hail	May
1124	C22019	Louisiana	LA	22	Calcasieu	Parish	22019	EMC	Y	Y	Y	Y	GIWW, Calcasieu	FEMA	Metrological	Enviromental	Hail	June
1124	C22019	Louisiana	LA	22	Calcasieu	Parish	22019	SC	Y	Y	Y	Y	GIWW, Calcasieu	Lit	Ecological	Equity	FSMC (Moth)	August	For Flighted Spony Moth, Vessels Arriving from Far East
1124	C22019	Louisiana	LA	22	Calcasieu	Parish	22019	SC	Y	Y	Y	Y	GIWW, Calcasieu	Lit	Ecological	Equity	FSMC (Moth)	July	For Flighted Spony Moth, Vessels Arriving from Far East
1124	C22019	Louisiana	LA	22	Calcasieu	Parish	22019	SC	Y	Y	Y	Y	GIWW, Calcasieu	Lit	Ecological	Equity	FSMC (Moth)	June	For Flighted Spony Moth, Vessels Arriving from Far East
1124	C22019	Louisiana	LA	22	Calcasieu	Parish	22019	SC	Y	Y	Y	Y	GIWW, Calcasieu	Lit	Ecological	Equity	FSMC (Moth)	October	For Flighted Spony Moth, Vessels Arriving from Far East
1124	C22019	Louisiana	LA	22	Calcasieu	Parish	22019	SC	Y	Y	Y	Y	GIWW, Calcasieu	Lit	Ecological	Equity	FSMC (Moth)	September	For Flighted Spony Moth, Vessels Arriving from Far East
1124	C22019	Louisiana	LA	22	Calcasieu	Parish	22019	SC	Y	Y	Y	Y	GIWW, Calcasieu	Lit	Ecological	Equity	FSMC (Moth)	May	For Flighted Spony Moth, Vessels Arriving from Far East
1124	C22019	Louisiana	LA	22	Calcasieu	Parish	22019	EMC	Y	Y	Y	Y	GIWW, Calcasieu	FEMA	Ecological	Enviromental	Wildfire	December
1124	C22019	Louisiana	LA	22	Calcasieu	Parish	22019	EMC	Y	Y	Y	Y	GIWW, Calcasieu	FEMA	Ecological	Enviromental	Wildfire	February
1124	C22019	Louisiana	LA	22	Calcasieu	Parish	22019	EMC	Y	Y	Y	Y	GIWW, Calcasieu	FEMA	Ecological	Enviromental	Wildfire	January
1124	C22019	Louisiana	LA	22	Calcasieu	Parish	22019	EMC	Y	Y	Y	Y	GIWW, Calcasieu	FEMA	Ecological	Enviromental	Wildfire	March
1124	C22019	Louisiana	LA	22	Calcasieu	Parish	22019	EMC	Y	Y	Y	Y	GIWW, Calcasieu	FEMA	Ecological	Enviromental	Wildfire	November
1124	C22019	Louisiana	LA	22	Calcasieu	Parish	22019	EMC	Y	Y	Y	Y	GIWW, Calcasieu	FEMA	Ecological	Enviromental	Wildfire	September
1124	C22019	Louisiana	LA	22	Calcasieu	Parish	22019	EMC	Y	Y	Y	Y	GIWW, Calcasieu	FEMA	Ecological	Enviromental	Wildfire	April
1124	C22019	Louisiana	LA	22	Calcasieu	Parish	22019	EMC	Y	Y	Y	Y	GIWW, Calcasieu	FEMA	Ecological	Enviromental	Wildfire	October
1124	C22019	Louisiana	LA	22	Calcasieu	Parish	22019	EMC	Y	Y	Y	Y	GIWW, Calcasieu	FEMA	Fluvial	Enviromental	Coastal Flooding/Storm Surge	June
1124	C22019	Louisiana	LA	22	Calcasieu	Parish	22019	EMC	Y	Y	Y	Y	GIWW, Calcasieu	FEMA	Fluvial	Enviromental	Coastal Flooding/Storm Surge	July
1124	C22019	Louisiana	LA	22	Calcasieu	Parish	22019	EMC	Y	Y	Y	Y	GIWW, Calcasieu	FEMA	Fluvial	Enviromental	Coastal Flooding/Storm Surge	August
1124	C22019	Louisiana	LA	22	Calcasieu	Parish	22019	EMC	Y	Y	Y	Y	GIWW, Calcasieu	FEMA	Fluvial	Enviromental	Coastal Flooding/Storm Surge	September
1124	C22019	Louisiana	LA	22	Calcasieu	Parish	22019	EMC	Y	Y	Y	Y	GIWW, Calcasieu	FEMA	Fluvial	Enviromental	Coastal Flooding/Storm Surge	October
1126	C22023	Louisiana	LA	22	Cameron	Parish	22023	EMC	Y	Y	N	Y	GIWW, Calcasieu	FEMA	Metrological	Enviromental	Cold Wave	November
1126	C22023	Louisiana	LA	22	Cameron	Parish	22023	EMC	Y	Y	N	Y	GIWW, Calcasieu	FEMA	Metrological	Enviromental	Cold Wave	December
1126	C22023	Louisiana	LA	22	Cameron	Parish	22023	EMC	Y	Y	N	Y	GIWW, Calcasieu	FEMA	Metrological	Enviromental	Cold Wave	January
1126	C22023	Louisiana	LA	22	Cameron	Parish	22023	EMC	Y	Y	N	Y	GIWW, Calcasieu	FEMA	Metrological	Enviromental	Cold Wave	February
1126	C22023	Louisiana	LA	22	Cameron	Parish	22023	EMC	Y	Y	N	Y	GIWW, Calcasieu	FEMA	Metrological	Enviromental	Winter Weather	November
1126	C22023	Louisiana	LA	22	Cameron	Parish	22023	EMC	Y	Y	N	Y	GIWW, Calcasieu	FEMA	Metrological	Enviromental	Winter Weather	December
1126	C22023	Louisiana	LA	22	Cameron	Parish	22023	EMC	Y	Y	N	Y	GIWW, Calcasieu	FEMA	Metrological	Enviromental	Winter Weather	January
1126	C22023	Louisiana	LA	22	Cameron	Parish	22023	EMC	Y	Y	N	Y	GIWW, Calcasieu	FEMA	Metrological	Enviromental	Winter Weather	February
1126	C22023	Louisiana	LA	22	Cameron	Parish	22023	EMC	Y	Y	N	Y	GIWW, Calcasieu	FEMA	Metrological	Enviromental	Winter Weather	March
1126	C22023	Louisiana	LA	22	Cameron	Parish	22023	EMC	Y	Y	N	Y	GIWW, Calcasieu	FEMA	Metrological	Enviromental	Hurricane	November
1126	C22023	Louisiana	LA	22	Cameron	Parish	22023	EMC	Y	Y	N	Y	GIWW, Calcasieu	FEMA	Metrological	Enviromental	Hurricane	June
1126	C22023	Louisiana	LA	22	Cameron	Parish	22023	EMC	Y	Y	N	Y	GIWW, Calcasieu	FEMA	Metrological	Enviromental	Hurricane	July
1126	C22023	Louisiana	LA	22	Cameron	Parish	22023	EMC	Y	Y	N	Y	GIWW, Calcasieu	FEMA	Metrological	Enviromental	Hurricane	August
1126	C22023	Louisiana	LA	22	Cameron	Parish	22023	EMC	Y	Y	N	Y	GIWW, Calcasieu	FEMA	Metrological	Enviromental	Hurricane	September
1126	C22023	Louisiana	LA	22	Cameron	Parish	22023	EMC	Y	Y	N	Y	GIWW, Calcasieu	FEMA	Metrological	Enviromental	Hurricane	October
1126	C22023	Louisiana	LA	22	Cameron	Parish	22023	BC	Y	Y	N	Y	GIWW, Calcasieu	Lit	Ecological	Enviromental	Termite Swarm	May	localized heavy swarms at night
1126	C22023	Louisiana	LA	22	Cameron	Parish	22023	DA	Y	Y	N	Y	GIWW, Calcasieu	Lit	Metrological	Enviromental	Marine Fog	November
1126	C22023	Louisiana	LA	22	Cameron	Parish	22023	DA	Y	Y	N	Y	GIWW, Calcasieu	Lit	Metrological	Enviromental	Marine Fog	January
1126	C22023	Louisiana	LA	22	Cameron	Parish	22023	DA	Y	Y	N	Y	GIWW, Calcasieu	Lit	Metrological	Enviromental	Marine Fog	February
1126	C22023	Louisiana	LA	22	Cameron	Parish	22023	DA	Y	Y	N	Y	GIWW, Calcasieu	Lit	Metrological	Enviromental	Marine Fog	March
1126	C22023	Louisiana	LA	22	Cameron	Parish	22023	DA	Y	Y	N	Y	GIWW, Calcasieu	Lit	Metrological	Enviromental	Marine Fog	October
1126	C22023	Louisiana	LA	22	Cameron	Parish	22023	DA	Y	Y	N	Y	GIWW, Calcasieu	Lit	Metrological	Enviromental	Marine Fog	December
22	C01043	Alabama	AL	01	Cullman	County	01043	EMC	N	N	N	N		FEMA	Metrological	Enviromental	Heat Wave	September
23	C01045	Alabama	AL	01	Dale	County	01045	EMC	N	N	N	N		FEMA	Metrological	Enviromental	Heat Wave	June
23	C01045	Alabama	AL	01	Dale	County	01045	EMC	N	N	N	N		FEMA	Metrological	Enviromental	Heat Wave	July
23	C01045	Alabama	AL	01	Dale	County	01045	EMC	N	N	N	N		FEMA	Metrological	Enviromental	Heat Wave	August
1126	C22023	Louisiana	LA	22	Cameron	Parish	22023	DA	Y	Y	N	Y	GIWW, Calcasieu	Lit	Cultural	Equity	Mardi Gras	February	River works, but business closures
1126	C22023	Louisiana	LA	22	Cameron	Parish	22023	BC	Y	Y	N	Y	GIWW, Calcasieu	Lit	Maritime	Equity	Ferry	January	Cameron Ferry
1126	C22023	Louisiana	LA	22	Cameron	Parish	22023	BC	Y	Y	N	Y	GIWW, Calcasieu	Lit	Maritime	Equity	Ferry	February	Cameron Ferry
1126	C22023	Louisiana	LA	22	Cameron	Parish	22023	BC	Y	Y	N	Y	GIWW, Calcasieu	Lit	Maritime	Equity	Ferry	March	Cameron Ferry
1126	C22023	Louisiana	LA	22	Cameron	Parish	22023	BC	Y	Y	N	Y	GIWW, Calcasieu	Lit	Maritime	Equity	Ferry	June	Cameron Ferry
1126	C22023	Louisiana	LA	22	Cameron	Parish	22023	BC	Y	Y	N	Y	GIWW, Calcasieu	Lit	Maritime	Equity	Ferry	July	Cameron Ferry
1126	C22023	Louisiana	LA	22	Cameron	Parish	22023	BC	Y	Y	N	Y	GIWW, Calcasieu	Lit	Maritime	Equity	Ferry	August	Cameron Ferry
1126	C22023	Louisiana	LA	22	Cameron	Parish	22023	BC	Y	Y	N	Y	GIWW, Calcasieu	Lit	Maritime	Equity	Ferry	September	Cameron Ferry
1126	C22023	Louisiana	LA	22	Cameron	Parish	22023	BC	Y	Y	N	Y	GIWW, Calcasieu	Lit	Maritime	Equity	Ferry	October	Cameron Ferry
1126	C22023	Louisiana	LA	22	Cameron	Parish	22023	BC	Y	Y	N	Y	GIWW, Calcasieu	Lit	Maritime	Equity	Ferry	November	Cameron Ferry
1126	C22023	Louisiana	LA	22	Cameron	Parish	22023	BC	Y	Y	N	Y	GIWW, Calcasieu	Lit	Maritime	Equity	Ferry	December	Cameron Ferry
1126	C22023	Louisiana	LA	22	Cameron	Parish	22023	EMC	Y	Y	N	Y	GIWW, Calcasieu	FEMA	Metrological	Enviromental	Cold Wave	March
1126	C22023	Louisiana	LA	22	Cameron	Parish	22023	EMC	Y	Y	N	Y	GIWW, Calcasieu	FEMA	Non Seasonal	Enviromental	Volcano
1126	C22023	Louisiana	LA	22	Cameron	Parish	22023	EMC	Y	Y	N	Y	GIWW, Calcasieu	FEMA	Non Seasonal	Enviromental	Earthquake
1126	C22023	Louisiana	LA	22	Cameron	Parish	22023	EMC	Y	Y	N	Y	GIWW, Calcasieu	FEMA	Geotechnical	Enviromental	Avalanche
1126	C22023	Louisiana	LA	22	Cameron	Parish	22023	EMC	Y	Y	N	Y	GIWW, Calcasieu	FEMA	Non Seasonal	Enviromental	Tsunami
1126	C22023	Louisiana	LA	22	Cameron	Parish	22023	BC	Y	Y	N	Y	GIWW, Calcasieu	Lit	Maritime	Equity	Ferry	May	Cameron Ferry
1126	C22023	Louisiana	LA	22	Cameron	Parish	22023	BC	Y	Y	N	Y	GIWW, Calcasieu	Lit	Maritime	Equity	Ferry	April	Cameron Ferry
1126	C22023	Louisiana	LA	22	Cameron	Parish	22023	EMC	Y	Y	N	Y	GIWW, Calcasieu	FEMA	Metrological	Enviromental	Hail	February
1126	C22023	Louisiana	LA	22	Cameron	Parish	22023	EMC	Y	Y	N	Y	GIWW, Calcasieu	FEMA	Metrological	Enviromental	Hail	March
1126	C22023	Louisiana	LA	22	Cameron	Parish	22023	EMC	Y	Y	N	Y	GIWW, Calcasieu	FEMA	Metrological	Enviromental	Hail	April
1126	C22023	Louisiana	LA	22	Cameron	Parish	22023	EMC	Y	Y	N	Y	GIWW, Calcasieu	FEMA	Metrological	Enviromental	Hail	May
1126	C22023	Louisiana	LA	22	Cameron	Parish	22023	EMC	Y	Y	N	Y	GIWW, Calcasieu	FEMA	Metrological	Enviromental	Hail	June
1126	C22023	Louisiana	LA	22	Cameron	Parish	22023	EMC	Y	Y	N	Y	GIWW, Calcasieu	FEMA	Ecological	Enviromental	Wildfire	December
1126	C22023	Louisiana	LA	22	Cameron	Parish	22023	EMC	Y	Y	N	Y	GIWW, Calcasieu	FEMA	Ecological	Enviromental	Wildfire	February
1126	C22023	Louisiana	LA	22	Cameron	Parish	22023	EMC	Y	Y	N	Y	GIWW, Calcasieu	FEMA	Ecological	Enviromental	Wildfire	January
1126	C22023	Louisiana	LA	22	Cameron	Parish	22023	EMC	Y	Y	N	Y	GIWW, Calcasieu	FEMA	Ecological	Enviromental	Wildfire	March
1126	C22023	Louisiana	LA	22	Cameron	Parish	22023	EMC	Y	Y	N	Y	GIWW, Calcasieu	FEMA	Ecological	Enviromental	Wildfire	November
1126	C22023	Louisiana	LA	22	Cameron	Parish	22023	EMC	Y	Y	N	Y	GIWW, Calcasieu	FEMA	Ecological	Enviromental	Wildfire	September
1126	C22023	Louisiana	LA	22	Cameron	Parish	22023	EMC	Y	Y	N	Y	GIWW, Calcasieu	FEMA	Ecological	Enviromental	Wildfire	April
1126	C22023	Louisiana	LA	22	Cameron	Parish	22023	EMC	Y	Y	N	Y	GIWW, Calcasieu	FEMA	Ecological	Enviromental	Wildfire	October
1126	C22023	Louisiana	LA	22	Cameron	Parish	22023	EMC	Y	Y	N	Y	GIWW, Calcasieu	FEMA	Fluvial	Enviromental	Coastal Flooding/Storm Surge	June
1126	C22023	Louisiana	LA	22	Cameron	Parish	22023	EMC	Y	Y	N	Y	GIWW, Calcasieu	FEMA	Fluvial	Enviromental	Coastal Flooding/Storm Surge	July
1126	C22023	Louisiana	LA	22	Cameron	Parish	22023	EMC	Y	Y	N	Y	GIWW, Calcasieu	FEMA	Fluvial	Enviromental	Coastal Flooding/Storm Surge	August
1126	C22023	Louisiana	LA	22	Cameron	Parish	22023	EMC	Y	Y	N	Y	GIWW, Calcasieu	FEMA	Fluvial	Enviromental	Coastal Flooding/Storm Surge	September
1126	C22023	Louisiana	LA	22	Cameron	Parish	22023	EMC	Y	Y	N	Y	GIWW, Calcasieu	FEMA	Fluvial	Enviromental	Coastal Flooding/Storm Surge	October
1403	C28001	Mississippi	MS	28	Adams	County	28001	EMC	Y	N	N	N	Mississippi River	FEMA	Metrological	Enviromental	Cold Wave	November
1403	C28001	Mississippi	MS	28	Adams	County	28001	EMC	Y	N	N	N	Mississippi River	FEMA	Metrological	Enviromental	Cold Wave	December
1403	C28001	Mississippi	MS	28	Adams	County	28001	EMC	Y	N	N	N	Mississippi River	FEMA	Metrological	Enviromental	Cold Wave	January
1403	C28001	Mississippi	MS	28	Adams	County	28001	EMC	Y	N	N	N	Mississippi River	FEMA	Metrological	Enviromental	Cold Wave	February
1403	C28001	Mississippi	MS	28	Adams	County	28001	EMC	Y	N	N	N	Mississippi River	FEMA	Metrological	Enviromental	Winter Weather	November
1403	C28001	Mississippi	MS	28	Adams	County	28001	EMC	Y	N	N	N	Mississippi River	FEMA	Metrological	Enviromental	Winter Weather	December
1403	C28001	Mississippi	MS	28	Adams	County	28001	EMC	Y	N	N	N	Mississippi River	FEMA	Metrological	Enviromental	Winter Weather	January
1403	C28001	Mississippi	MS	28	Adams	County	28001	EMC	Y	N	N	N	Mississippi River	FEMA	Metrological	Enviromental	Winter Weather	February
1403	C28001	Mississippi	MS	28	Adams	County	28001	EMC	Y	N	N	N	Mississippi River	FEMA	Metrological	Enviromental	Winter Weather	March
1403	C28001	Mississippi	MS	28	Adams	County	28001	EMC	Y	N	N	N	Mississippi River	FEMA	Metrological	Enviromental	Hurricane	November
1403	C28001	Mississippi	MS	28	Adams	County	28001	EMC	Y	N	N	N	Mississippi River	FEMA	Metrological	Enviromental	Hurricane	June
1403	C28001	Mississippi	MS	28	Adams	County	28001	EMC	Y	N	N	N	Mississippi River	FEMA	Metrological	Enviromental	Hurricane	July
1403	C28001	Mississippi	MS	28	Adams	County	28001	EMC	Y	N	N	N	Mississippi River	FEMA	Metrological	Enviromental	Hurricane	August
1403	C28001	Mississippi	MS	28	Adams	County	28001	EMC	Y	N	N	N	Mississippi River	FEMA	Metrological	Enviromental	Hurricane	September
1403	C28001	Mississippi	MS	28	Adams	County	28001	EMC	Y	N	N	N	Mississippi River	FEMA	Metrological	Enviromental	Hurricane	October
23	C01045	Alabama	AL	01	Dale	County	01045	EMC	N	N	N	N		FEMA	Metrological	Enviromental	Heat Wave	September
24	C01047	Alabama	AL	01	Dallas	County	01047	EMC	Y	N	N	N	Alabama - Coosa	Lit	Metrological	Enviromental	Heat Wave	June
24	C01047	Alabama	AL	01	Dallas	County	01047	EMC	Y	N	N	N	Alabama - Coosa	FEMA	Metrological	Enviromental	Heat Wave	July
24	C01047	Alabama	AL	01	Dallas	County	01047	EMC	Y	N	N	N	Alabama - Coosa	FEMA	Metrological	Enviromental	Heat Wave	August
1403	C28001	Mississippi	MS	28	Adams	County	28001	EMC	Y	N	N	N	Mississippi River	FEMA	Metrological	Enviromental	Cold Wave	March
1403	C28001	Mississippi	MS	28	Adams	County	28001	BC	Y	N	N	N	Mississippi River	Lit	Fluvial	Enviromental	Low Water	November
1403	C28001	Mississippi	MS	28	Adams	County	28001	BC	Y	N	N	N	Mississippi River	Lit	Fluvial	Enviromental	Low Water	August
1403	C28001	Mississippi	MS	28	Adams	County	28001	BC	Y	N	N	N	Mississippi River	Lit	Fluvial	Enviromental	Low Water	September
1403	C28001	Mississippi	MS	28	Adams	County	28001	BC	Y	N	N	N	Mississippi River	Lit	Fluvial	Enviromental	Low Water	October
1403	C28001	Mississippi	MS	28	Adams	County	28001	BC	Y	N	N	N	Mississippi River	Lit	Fluvial	Enviromental	High Water	March
1403	C28001	Mississippi	MS	28	Adams	County	28001	BC	Y	N	N	N	Mississippi River	Lit	Fluvial	Enviromental	High Water	April
1403	C28001	Mississippi	MS	28	Adams	County	28001	BC	Y	N	N	N	Mississippi River	Lit	Fluvial	Enviromental	High Water	May
1403	C28001	Mississippi	MS	28	Adams	County	28001	EMC	Y	N	N	N	Mississippi River	FEMA	Non Seasonal	Enviromental	Volcano
1403	C28001	Mississippi	MS	28	Adams	County	28001	EMC	Y	N	N	N	Mississippi River	FEMA	Non Seasonal	Enviromental	Earthquake
1403	C28001	Mississippi	MS	28	Adams	County	28001	EMC	Y	N	N	N	Mississippi River	FEMA	Geotechnical	Enviromental	Avalanche
1403	C28001	Mississippi	MS	28	Adams	County	28001	EMC	Y	N	N	N	Mississippi River	FEMA	Non Seasonal	Enviromental	Tsunami
1403	C28001	Mississippi	MS	28	Adams	County	28001	EMC	Y	N	N	N	Mississippi River	FEMA	Metrological	Enviromental	Hail	February
1403	C28001	Mississippi	MS	28	Adams	County	28001	EMC	Y	N	N	N	Mississippi River	FEMA	Metrological	Enviromental	Hail	March
1403	C28001	Mississippi	MS	28	Adams	County	28001	EMC	Y	N	N	N	Mississippi River	FEMA	Metrological	Enviromental	Hail	April
1403	C28001	Mississippi	MS	28	Adams	County	28001	EMC	Y	N	N	N	Mississippi River	FEMA	Metrological	Enviromental	Hail	May
1403	C28001	Mississippi	MS	28	Adams	County	28001	EMC	Y	N	N	N	Mississippi River	FEMA	Metrological	Enviromental	Hail	June
1403	C28001	Mississippi	MS	28	Adams	County	28001	EMC	Y	N	N	N	Mississippi River	FEMA	Ecological	Enviromental	Wildfire	December
1403	C28001	Mississippi	MS	28	Adams	County	28001	EMC	Y	N	N	N	Mississippi River	FEMA	Ecological	Enviromental	Wildfire	February
1403	C28001	Mississippi	MS	28	Adams	County	28001	EMC	Y	N	N	N	Mississippi River	FEMA	Ecological	Enviromental	Wildfire	January
1403	C28001	Mississippi	MS	28	Adams	County	28001	EMC	Y	N	N	N	Mississippi River	FEMA	Ecological	Enviromental	Wildfire	March
1403	C28001	Mississippi	MS	28	Adams	County	28001	EMC	Y	N	N	N	Mississippi River	FEMA	Ecological	Enviromental	Wildfire	November
1403	C28001	Mississippi	MS	28	Adams	County	28001	EMC	Y	N	N	N	Mississippi River	FEMA	Ecological	Enviromental	Wildfire	September
1403	C28001	Mississippi	MS	28	Adams	County	28001	EMC	Y	N	N	N	Mississippi River	FEMA	Ecological	Enviromental	Wildfire	April
1403	C28001	Mississippi	MS	28	Adams	County	28001	EMC	Y	N	N	N	Mississippi River	FEMA	Ecological	Enviromental	Wildfire	October
1408	C28011	Mississippi	MS	28	Bolivar	County	28011	EMC	Y	N	N	N	Mississippi River	FEMA	Metrological	Enviromental	Cold Wave	November
1408	C28011	Mississippi	MS	28	Bolivar	County	28011	EMC	Y	N	N	N	Mississippi River	FEMA	Metrological	Enviromental	Cold Wave	December
1408	C28011	Mississippi	MS	28	Bolivar	County	28011	EMC	Y	N	N	N	Mississippi River	FEMA	Metrological	Enviromental	Cold Wave	January
1408	C28011	Mississippi	MS	28	Bolivar	County	28011	EMC	Y	N	N	N	Mississippi River	FEMA	Metrological	Enviromental	Cold Wave	February
1408	C28011	Mississippi	MS	28	Bolivar	County	28011	EMC	Y	N	N	N	Mississippi River	FEMA	Metrological	Enviromental	Winter Weather	November
1408	C28011	Mississippi	MS	28	Bolivar	County	28011	EMC	Y	N	N	N	Mississippi River	FEMA	Metrological	Enviromental	Winter Weather	December
1408	C28011	Mississippi	MS	28	Bolivar	County	28011	EMC	Y	N	N	N	Mississippi River	FEMA	Metrological	Enviromental	Winter Weather	January
1408	C28011	Mississippi	MS	28	Bolivar	County	28011	EMC	Y	N	N	N	Mississippi River	FEMA	Metrological	Enviromental	Winter Weather	February
1408	C28011	Mississippi	MS	28	Bolivar	County	28011	EMC	Y	N	N	N	Mississippi River	FEMA	Metrological	Enviromental	Winter Weather	March
1408	C28011	Mississippi	MS	28	Bolivar	County	28011	EMC	Y	N	N	N	Mississippi River	FEMA	Metrological	Enviromental	Hurricane	November
1408	C28011	Mississippi	MS	28	Bolivar	County	28011	EMC	Y	N	N	N	Mississippi River	FEMA	Metrological	Enviromental	Hurricane	June
1408	C28011	Mississippi	MS	28	Bolivar	County	28011	EMC	Y	N	N	N	Mississippi River	FEMA	Metrological	Enviromental	Hurricane	July
1408	C28011	Mississippi	MS	28	Bolivar	County	28011	EMC	Y	N	N	N	Mississippi River	FEMA	Metrological	Enviromental	Hurricane	August
1408	C28011	Mississippi	MS	28	Bolivar	County	28011	EMC	Y	N	N	N	Mississippi River	FEMA	Metrological	Enviromental	Hurricane	September
1408	C28011	Mississippi	MS	28	Bolivar	County	28011	EMC	Y	N	N	N	Mississippi River	FEMA	Metrological	Enviromental	Hurricane	October
24	C01047	Alabama	AL	01	Dallas	County	01047	EMC	Y	N	N	N	Alabama - Coosa	FEMA	Metrological	Enviromental	Heat Wave	September
24	C01047	Alabama	AL	01	Dallas	County	01047	DA	Y	N	N	N	Alabama - Coosa	Lit	Maritime	Equity	Recreational Boating	June
24	C01047	Alabama	AL	01	Dallas	County	01047	DA	Y	N	N	N	Alabama - Coosa	Lit	Maritime	Equity	Recreational Boating	July
24	C01047	Alabama	AL	01	Dallas	County	01047	DA	Y	N	N	N	Alabama - Coosa	Lit	Maritime	Equity	Recreational Boating	August
1408	C28011	Mississippi	MS	28	Bolivar	County	28011	EMC	Y	N	N	N	Mississippi River	FEMA	Metrological	Enviromental	Cold Wave	March
1408	C28011	Mississippi	MS	28	Bolivar	County	28011	BC	Y	N	N	N	Mississippi River	Lit	Fluvial	Enviromental	Low Water	November
1408	C28011	Mississippi	MS	28	Bolivar	County	28011	BC	Y	N	N	N	Mississippi River	Lit	Fluvial	Enviromental	Low Water	August
1408	C28011	Mississippi	MS	28	Bolivar	County	28011	BC	Y	N	N	N	Mississippi River	Lit	Fluvial	Enviromental	Low Water	September
1408	C28011	Mississippi	MS	28	Bolivar	County	28011	BC	Y	N	N	N	Mississippi River	Lit	Fluvial	Enviromental	Low Water	October
1408	C28011	Mississippi	MS	28	Bolivar	County	28011	BC	Y	N	N	N	Mississippi River	Lit	Fluvial	Enviromental	High Water	March
1408	C28011	Mississippi	MS	28	Bolivar	County	28011	BC	Y	N	N	N	Mississippi River	Lit	Fluvial	Enviromental	High Water	April
1408	C28011	Mississippi	MS	28	Bolivar	County	28011	BC	Y	N	N	N	Mississippi River	Lit	Fluvial	Enviromental	High Water	May
1408	C28011	Mississippi	MS	28	Bolivar	County	28011	EMC	Y	N	N	N	Mississippi River	FEMA	Non Seasonal	Enviromental	Volcano
1408	C28011	Mississippi	MS	28	Bolivar	County	28011	EMC	Y	N	N	N	Mississippi River	FEMA	Non Seasonal	Enviromental	Earthquake
1408	C28011	Mississippi	MS	28	Bolivar	County	28011	EMC	Y	N	N	N	Mississippi River	FEMA	Geotechnical	Enviromental	Avalanche
1408	C28011	Mississippi	MS	28	Bolivar	County	28011	EMC	Y	N	N	N	Mississippi River	FEMA	Non Seasonal	Enviromental	Tsunami
1408	C28011	Mississippi	MS	28	Bolivar	County	28011	EMC	Y	N	N	N	Mississippi River	FEMA	Metrological	Enviromental	Hail	February
1408	C28011	Mississippi	MS	28	Bolivar	County	28011	EMC	Y	N	N	N	Mississippi River	FEMA	Metrological	Enviromental	Hail	March
1408	C28011	Mississippi	MS	28	Bolivar	County	28011	EMC	Y	N	N	N	Mississippi River	FEMA	Metrological	Enviromental	Hail	April
1408	C28011	Mississippi	MS	28	Bolivar	County	28011	EMC	Y	N	N	N	Mississippi River	FEMA	Metrological	Enviromental	Hail	May
1408	C28011	Mississippi	MS	28	Bolivar	County	28011	EMC	Y	N	N	N	Mississippi River	FEMA	Metrological	Enviromental	Hail	June
1408	C28011	Mississippi	MS	28	Bolivar	County	28011	EMC	Y	N	N	N	Mississippi River	FEMA	Ecological	Enviromental	Wildfire	December
1408	C28011	Mississippi	MS	28	Bolivar	County	28011	EMC	Y	N	N	N	Mississippi River	FEMA	Ecological	Enviromental	Wildfire	February
1408	C28011	Mississippi	MS	28	Bolivar	County	28011	EMC	Y	N	N	N	Mississippi River	FEMA	Ecological	Enviromental	Wildfire	January
1408	C28011	Mississippi	MS	28	Bolivar	County	28011	EMC	Y	N	N	N	Mississippi River	FEMA	Ecological	Enviromental	Wildfire	March
1408	C28011	Mississippi	MS	28	Bolivar	County	28011	EMC	Y	N	N	N	Mississippi River	FEMA	Ecological	Enviromental	Wildfire	November
1408	C28011	Mississippi	MS	28	Bolivar	County	28011	EMC	Y	N	N	N	Mississippi River	FEMA	Ecological	Enviromental	Wildfire	September
1408	C28011	Mississippi	MS	28	Bolivar	County	28011	EMC	Y	N	N	N	Mississippi River	FEMA	Ecological	Enviromental	Wildfire	April
1408	C28011	Mississippi	MS	28	Bolivar	County	28011	EMC	Y	N	N	N	Mississippi River	FEMA	Ecological	Enviromental	Wildfire	October
1413	C28021	Mississippi	MS	28	Claiborne	County	28021	EMC	N	N	N	N	Mississippi River	FEMA	Metrological	Enviromental	Cold Wave	November
1413	C28021	Mississippi	MS	28	Claiborne	County	28021	EMC	N	N	N	N	Mississippi River	FEMA	Metrological	Enviromental	Cold Wave	December
1413	C28021	Mississippi	MS	28	Claiborne	County	28021	EMC	N	N	N	N	Mississippi River	FEMA	Metrological	Enviromental	Cold Wave	January
1413	C28021	Mississippi	MS	28	Claiborne	County	28021	EMC	N	N	N	N	Mississippi River	FEMA	Metrological	Enviromental	Cold Wave	February
1413	C28021	Mississippi	MS	28	Claiborne	County	28021	EMC	N	N	N	N	Mississippi River	FEMA	Metrological	Enviromental	Winter Weather	November
1413	C28021	Mississippi	MS	28	Claiborne	County	28021	EMC	N	N	N	N	Mississippi River	FEMA	Metrological	Enviromental	Winter Weather	December
1413	C28021	Mississippi	MS	28	Claiborne	County	28021	EMC	N	N	N	N	Mississippi River	FEMA	Metrological	Enviromental	Winter Weather	January
1413	C28021	Mississippi	MS	28	Claiborne	County	28021	EMC	N	N	N	N	Mississippi River	FEMA	Metrological	Enviromental	Winter Weather	February
1413	C28021	Mississippi	MS	28	Claiborne	County	28021	EMC	N	N	N	N	Mississippi River	FEMA	Metrological	Enviromental	Winter Weather	March
1413	C28021	Mississippi	MS	28	Claiborne	County	28021	EMC	N	N	N	N	Mississippi River	FEMA	Metrological	Enviromental	Hurricane	November
1413	C28021	Mississippi	MS	28	Claiborne	County	28021	EMC	N	N	N	N	Mississippi River	FEMA	Metrological	Enviromental	Hurricane	June
1413	C28021	Mississippi	MS	28	Claiborne	County	28021	EMC	N	N	N	N	Mississippi River	FEMA	Metrological	Enviromental	Hurricane	July
1413	C28021	Mississippi	MS	28	Claiborne	County	28021	EMC	N	N	N	N	Mississippi River	FEMA	Metrological	Enviromental	Hurricane	August
1413	C28021	Mississippi	MS	28	Claiborne	County	28021	EMC	N	N	N	N	Mississippi River	FEMA	Metrological	Enviromental	Hurricane	September
1413	C28021	Mississippi	MS	28	Claiborne	County	28021	EMC	N	N	N	N	Mississippi River	FEMA	Metrological	Enviromental	Hurricane	October
24	C01047	Alabama	AL	01	Dallas	County	01047	DA	Y	N	N	N	Alabama - Coosa	Lit	Maritime	Equity	Recreational Boating	September
24	C01047	Alabama	AL	01	Dallas	County	01047	DA	Y	N	N	N	Alabama - Coosa	Lit	Maritime	Equity	Recreational Boating	May
25	C01049	Alabama	AL	01	DeKalb	County	01049	EMC	N	N	N	N		FEMA	Metrological	Enviromental	Heat Wave	June
25	C01049	Alabama	AL	01	DeKalb	County	01049	EMC	N	N	N	N		FEMA	Metrological	Enviromental	Heat Wave	July
1413	C28021	Mississippi	MS	28	Claiborne	County	28021	EMC	N	N	N	N	Mississippi River	FEMA	Metrological	Enviromental	Cold Wave	March
1413	C28021	Mississippi	MS	28	Claiborne	County	28021	EMC	N	N	N	N	Mississippi River	FEMA	Non Seasonal	Enviromental	Volcano
1413	C28021	Mississippi	MS	28	Claiborne	County	28021	EMC	N	N	N	N	Mississippi River	FEMA	Non Seasonal	Enviromental	Earthquake
1413	C28021	Mississippi	MS	28	Claiborne	County	28021	EMC	N	N	N	N	Mississippi River	FEMA	Geotechnical	Enviromental	Avalanche
1413	C28021	Mississippi	MS	28	Claiborne	County	28021	EMC	N	N	N	N	Mississippi River	FEMA	Non Seasonal	Enviromental	Tsunami
1413	C28021	Mississippi	MS	28	Claiborne	County	28021	EMC	N	N	N	N	Mississippi River	FEMA	Ecological	Enviromental	Wildfire	December
1413	C28021	Mississippi	MS	28	Claiborne	County	28021	EMC	N	N	N	N	Mississippi River	FEMA	Ecological	Enviromental	Wildfire	February
1413	C28021	Mississippi	MS	28	Claiborne	County	28021	EMC	N	N	N	N	Mississippi River	FEMA	Ecological	Enviromental	Wildfire	January
1413	C28021	Mississippi	MS	28	Claiborne	County	28021	EMC	N	N	N	N	Mississippi River	FEMA	Ecological	Enviromental	Wildfire	March
1413	C28021	Mississippi	MS	28	Claiborne	County	28021	EMC	N	N	N	N	Mississippi River	FEMA	Ecological	Enviromental	Wildfire	November
1413	C28021	Mississippi	MS	28	Claiborne	County	28021	EMC	N	N	N	N	Mississippi River	FEMA	Ecological	Enviromental	Wildfire	September
1413	C28021	Mississippi	MS	28	Claiborne	County	28021	EMC	N	N	N	N	Mississippi River	FEMA	Ecological	Enviromental	Wildfire	April
1413	C28021	Mississippi	MS	28	Claiborne	County	28021	EMC	N	N	N	N	Mississippi River	FEMA	Ecological	Enviromental	Wildfire	October
1413	C28021	Mississippi	MS	28	Claiborne	County	28021	EMC	N	N	N	N	Mississippi River	FEMA	Metrological	Enviromental	Hail	February
1413	C28021	Mississippi	MS	28	Claiborne	County	28021	EMC	N	N	N	N	Mississippi River	FEMA	Metrological	Enviromental	Hail	March
1413	C28021	Mississippi	MS	28	Claiborne	County	28021	EMC	N	N	N	N	Mississippi River	FEMA	Metrological	Enviromental	Hail	April
1413	C28021	Mississippi	MS	28	Claiborne	County	28021	EMC	N	N	N	N	Mississippi River	FEMA	Metrological	Enviromental	Hail	May
1413	C28021	Mississippi	MS	28	Claiborne	County	28021	EMC	N	N	N	N	Mississippi River	FEMA	Metrological	Enviromental	Hail	June
1416	C28027	Mississippi	MS	28	Coahoma	County	28027	EMC	Y	N	N	N	Mississippi River	FEMA	Metrological	Enviromental	Cold Wave	November
1416	C28027	Mississippi	MS	28	Coahoma	County	28027	EMC	Y	N	N	N	Mississippi River	FEMA	Metrological	Enviromental	Cold Wave	December
1416	C28027	Mississippi	MS	28	Coahoma	County	28027	EMC	Y	N	N	N	Mississippi River	FEMA	Metrological	Enviromental	Cold Wave	January
1416	C28027	Mississippi	MS	28	Coahoma	County	28027	EMC	Y	N	N	N	Mississippi River	FEMA	Metrological	Enviromental	Cold Wave	February
1416	C28027	Mississippi	MS	28	Coahoma	County	28027	EMC	Y	N	N	N	Mississippi River	FEMA	Metrological	Enviromental	Winter Weather	November
1416	C28027	Mississippi	MS	28	Coahoma	County	28027	EMC	Y	N	N	N	Mississippi River	FEMA	Metrological	Enviromental	Winter Weather	December
1416	C28027	Mississippi	MS	28	Coahoma	County	28027	EMC	Y	N	N	N	Mississippi River	FEMA	Metrological	Enviromental	Winter Weather	January
1416	C28027	Mississippi	MS	28	Coahoma	County	28027	EMC	Y	N	N	N	Mississippi River	FEMA	Metrological	Enviromental	Winter Weather	February
1416	C28027	Mississippi	MS	28	Coahoma	County	28027	EMC	Y	N	N	N	Mississippi River	FEMA	Metrological	Enviromental	Winter Weather	March
1416	C28027	Mississippi	MS	28	Coahoma	County	28027	EMC	Y	N	N	N	Mississippi River	FEMA	Metrological	Enviromental	Hurricane	November
1416	C28027	Mississippi	MS	28	Coahoma	County	28027	EMC	Y	N	N	N	Mississippi River	FEMA	Metrological	Enviromental	Hurricane	June
1416	C28027	Mississippi	MS	28	Coahoma	County	28027	EMC	Y	N	N	N	Mississippi River	FEMA	Metrological	Enviromental	Hurricane	July
1416	C28027	Mississippi	MS	28	Coahoma	County	28027	EMC	Y	N	N	N	Mississippi River	FEMA	Metrological	Enviromental	Hurricane	August
1416	C28027	Mississippi	MS	28	Coahoma	County	28027	EMC	Y	N	N	N	Mississippi River	FEMA	Metrological	Enviromental	Hurricane	September
1416	C28027	Mississippi	MS	28	Coahoma	County	28027	EMC	Y	N	N	N	Mississippi River	FEMA	Metrological	Enviromental	Hurricane	October
25	C01049	Alabama	AL	01	DeKalb	County	01049	EMC	N	N	N	N		FEMA	Metrological	Enviromental	Heat Wave	August
25	C01049	Alabama	AL	01	DeKalb	County	01049	EMC	N	N	N	N		FEMA	Metrological	Enviromental	Heat Wave	September
26	C01051	Alabama	AL	01	Elmore	County	01051	EMC	Y	N	N	N	Alabama - Coosa	Lit	Metrological	Enviromental	Heat Wave	June
26	C01051	Alabama	AL	01	Elmore	County	01051	EMC	Y	N	N	N	Alabama - Coosa	FEMA	Metrological	Enviromental	Heat Wave	July
1416	C28027	Mississippi	MS	28	Coahoma	County	28027	EMC	Y	N	N	N	Mississippi River	FEMA	Metrological	Enviromental	Cold Wave	March
1416	C28027	Mississippi	MS	28	Coahoma	County	28027	BC	Y	N	N	N	Mississippi River	Lit	Fluvial	Enviromental	Low Water	November
1416	C28027	Mississippi	MS	28	Coahoma	County	28027	BC	Y	N	N	N	Mississippi River	Lit	Fluvial	Enviromental	Low Water	August
1416	C28027	Mississippi	MS	28	Coahoma	County	28027	BC	Y	N	N	N	Mississippi River	Lit	Fluvial	Enviromental	Low Water	September
1416	C28027	Mississippi	MS	28	Coahoma	County	28027	BC	Y	N	N	N	Mississippi River	Lit	Fluvial	Enviromental	Low Water	October
1416	C28027	Mississippi	MS	28	Coahoma	County	28027	BC	Y	N	N	N	Mississippi River	Lit	Fluvial	Enviromental	High Water	March
1416	C28027	Mississippi	MS	28	Coahoma	County	28027	BC	Y	N	N	N	Mississippi River	Lit	Fluvial	Enviromental	High Water	April
1416	C28027	Mississippi	MS	28	Coahoma	County	28027	BC	Y	N	N	N	Mississippi River	Lit	Fluvial	Enviromental	High Water	May
1416	C28027	Mississippi	MS	28	Coahoma	County	28027	EMC	Y	N	N	N	Mississippi River	FEMA	Non Seasonal	Enviromental	Volcano
1416	C28027	Mississippi	MS	28	Coahoma	County	28027	EMC	Y	N	N	N	Mississippi River	FEMA	Non Seasonal	Enviromental	Earthquake
1416	C28027	Mississippi	MS	28	Coahoma	County	28027	EMC	Y	N	N	N	Mississippi River	FEMA	Geotechnical	Enviromental	Avalanche
1416	C28027	Mississippi	MS	28	Coahoma	County	28027	EMC	Y	N	N	N	Mississippi River	FEMA	Non Seasonal	Enviromental	Tsunami
1416	C28027	Mississippi	MS	28	Coahoma	County	28027	EMC	Y	N	N	N	Mississippi River	FEMA	Metrological	Enviromental	Hail	February
1416	C28027	Mississippi	MS	28	Coahoma	County	28027	EMC	Y	N	N	N	Mississippi River	FEMA	Metrological	Enviromental	Hail	March
1416	C28027	Mississippi	MS	28	Coahoma	County	28027	EMC	Y	N	N	N	Mississippi River	FEMA	Metrological	Enviromental	Hail	April
1416	C28027	Mississippi	MS	28	Coahoma	County	28027	EMC	Y	N	N	N	Mississippi River	FEMA	Metrological	Enviromental	Hail	May
1416	C28027	Mississippi	MS	28	Coahoma	County	28027	EMC	Y	N	N	N	Mississippi River	FEMA	Metrological	Enviromental	Hail	June
1416	C28027	Mississippi	MS	28	Coahoma	County	28027	EMC	Y	N	N	N	Mississippi River	FEMA	Ecological	Enviromental	Wildfire	December
1416	C28027	Mississippi	MS	28	Coahoma	County	28027	EMC	Y	N	N	N	Mississippi River	FEMA	Ecological	Enviromental	Wildfire	February
1416	C28027	Mississippi	MS	28	Coahoma	County	28027	EMC	Y	N	N	N	Mississippi River	FEMA	Ecological	Enviromental	Wildfire	January
1416	C28027	Mississippi	MS	28	Coahoma	County	28027	EMC	Y	N	N	N	Mississippi River	FEMA	Ecological	Enviromental	Wildfire	March
1416	C28027	Mississippi	MS	28	Coahoma	County	28027	EMC	Y	N	N	N	Mississippi River	FEMA	Ecological	Enviromental	Wildfire	November
1416	C28027	Mississippi	MS	28	Coahoma	County	28027	EMC	Y	N	N	N	Mississippi River	FEMA	Ecological	Enviromental	Wildfire	September
1416	C28027	Mississippi	MS	28	Coahoma	County	28027	EMC	Y	N	N	N	Mississippi River	FEMA	Ecological	Enviromental	Wildfire	April
1416	C28027	Mississippi	MS	28	Coahoma	County	28027	EMC	Y	N	N	N	Mississippi River	FEMA	Ecological	Enviromental	Wildfire	October
1129	C22029	Louisiana	LA	22	Concordia	Parish	22029	EMC	Y	N	N	N	Mississippi River	FEMA	Metrological	Enviromental	Cold Wave	November
1129	C22029	Louisiana	LA	22	Concordia	Parish	22029	EMC	Y	N	N	N	Mississippi River	FEMA	Metrological	Enviromental	Cold Wave	December
1129	C22029	Louisiana	LA	22	Concordia	Parish	22029	EMC	Y	N	N	N	Mississippi River	FEMA	Metrological	Enviromental	Cold Wave	January
1129	C22029	Louisiana	LA	22	Concordia	Parish	22029	EMC	Y	N	N	N	Mississippi River	FEMA	Metrological	Enviromental	Cold Wave	February
1129	C22029	Louisiana	LA	22	Concordia	Parish	22029	EMC	Y	N	N	N	Mississippi River	FEMA	Metrological	Enviromental	Winter Weather	November
1129	C22029	Louisiana	LA	22	Concordia	Parish	22029	EMC	Y	N	N	N	Mississippi River	FEMA	Metrological	Enviromental	Winter Weather	December
1129	C22029	Louisiana	LA	22	Concordia	Parish	22029	EMC	Y	N	N	N	Mississippi River	FEMA	Metrological	Enviromental	Winter Weather	January
1129	C22029	Louisiana	LA	22	Concordia	Parish	22029	EMC	Y	N	N	N	Mississippi River	FEMA	Metrological	Enviromental	Winter Weather	February
1129	C22029	Louisiana	LA	22	Concordia	Parish	22029	EMC	Y	N	N	N	Mississippi River	FEMA	Metrological	Enviromental	Winter Weather	March
1129	C22029	Louisiana	LA	22	Concordia	Parish	22029	EMC	Y	N	N	N	Mississippi River	FEMA	Metrological	Enviromental	Hurricane	November
1129	C22029	Louisiana	LA	22	Concordia	Parish	22029	EMC	Y	N	N	N	Mississippi River	FEMA	Metrological	Enviromental	Hurricane	June
1129	C22029	Louisiana	LA	22	Concordia	Parish	22029	EMC	Y	N	N	N	Mississippi River	FEMA	Metrological	Enviromental	Hurricane	July
1129	C22029	Louisiana	LA	22	Concordia	Parish	22029	EMC	Y	N	N	N	Mississippi River	FEMA	Metrological	Enviromental	Hurricane	August
1129	C22029	Louisiana	LA	22	Concordia	Parish	22029	EMC	Y	N	N	N	Mississippi River	FEMA	Metrological	Enviromental	Hurricane	September
1129	C22029	Louisiana	LA	22	Concordia	Parish	22029	EMC	Y	N	N	N	Mississippi River	FEMA	Metrological	Enviromental	Hurricane	October
26	C01051	Alabama	AL	01	Elmore	County	01051	EMC	Y	N	N	N	Alabama - Coosa	FEMA	Metrological	Enviromental	Heat Wave	August
26	C01051	Alabama	AL	01	Elmore	County	01051	EMC	Y	N	N	N	Alabama - Coosa	FEMA	Metrological	Enviromental	Heat Wave	September
26	C01051	Alabama	AL	01	Elmore	County	01051	DA	Y	N	N	N	Alabama - Coosa	Lit	Maritime	Equity	Recreational Boating	June
26	C01051	Alabama	AL	01	Elmore	County	01051	DA	Y	N	N	N	Alabama - Coosa	Lit	Maritime	Equity	Recreational Boating	July
1129	C22029	Louisiana	LA	22	Concordia	Parish	22029	EMC	Y	N	N	N	Mississippi River	FEMA	Metrological	Enviromental	Cold Wave	March
1129	C22029	Louisiana	LA	22	Concordia	Parish	22029	BC	Y	N	N	N	Mississippi River	Lit	Fluvial	Enviromental	Low Water	November
1129	C22029	Louisiana	LA	22	Concordia	Parish	22029	BC	Y	N	N	N	Mississippi River	Lit	Fluvial	Enviromental	Low Water	August
1129	C22029	Louisiana	LA	22	Concordia	Parish	22029	BC	Y	N	N	N	Mississippi River	Lit	Fluvial	Enviromental	Low Water	September
1129	C22029	Louisiana	LA	22	Concordia	Parish	22029	BC	Y	N	N	N	Mississippi River	Lit	Fluvial	Enviromental	Low Water	October
1129	C22029	Louisiana	LA	22	Concordia	Parish	22029	BC	Y	N	N	N	Mississippi River	Lit	Fluvial	Enviromental	High Water	March
1129	C22029	Louisiana	LA	22	Concordia	Parish	22029	BC	Y	N	N	N	Mississippi River	Lit	Fluvial	Enviromental	High Water	April
1129	C22029	Louisiana	LA	22	Concordia	Parish	22029	BC	Y	N	N	N	Mississippi River	Lit	Fluvial	Enviromental	High Water	May
1129	C22029	Louisiana	LA	22	Concordia	Parish	22029	EMC	Y	N	N	N	Mississippi River	FEMA	Non Seasonal	Enviromental	Volcano
1129	C22029	Louisiana	LA	22	Concordia	Parish	22029	EMC	Y	N	N	N	Mississippi River	FEMA	Non Seasonal	Enviromental	Earthquake
1129	C22029	Louisiana	LA	22	Concordia	Parish	22029	EMC	Y	N	N	N	Mississippi River	FEMA	Geotechnical	Enviromental	Avalanche
1129	C22029	Louisiana	LA	22	Concordia	Parish	22029	EMC	Y	N	N	N	Mississippi River	FEMA	Non Seasonal	Enviromental	Tsunami
1129	C22029	Louisiana	LA	22	Concordia	Parish	22029	EMC	Y	N	N	N	Mississippi River	FEMA	Metrological	Enviromental	Hail	February
1129	C22029	Louisiana	LA	22	Concordia	Parish	22029	EMC	Y	N	N	N	Mississippi River	FEMA	Metrological	Enviromental	Hail	March
1129	C22029	Louisiana	LA	22	Concordia	Parish	22029	EMC	Y	N	N	N	Mississippi River	FEMA	Metrological	Enviromental	Hail	April
1129	C22029	Louisiana	LA	22	Concordia	Parish	22029	EMC	Y	N	N	N	Mississippi River	FEMA	Metrological	Enviromental	Hail	May
1129	C22029	Louisiana	LA	22	Concordia	Parish	22029	EMC	Y	N	N	N	Mississippi River	FEMA	Metrological	Enviromental	Hail	June
1129	C22029	Louisiana	LA	22	Concordia	Parish	22029	EMC	Y	N	N	N	Mississippi River	FEMA	Ecological	Enviromental	Wildfire	December
1129	C22029	Louisiana	LA	22	Concordia	Parish	22029	EMC	Y	N	N	N	Mississippi River	FEMA	Ecological	Enviromental	Wildfire	February
1129	C22029	Louisiana	LA	22	Concordia	Parish	22029	EMC	Y	N	N	N	Mississippi River	FEMA	Ecological	Enviromental	Wildfire	January
1129	C22029	Louisiana	LA	22	Concordia	Parish	22029	EMC	Y	N	N	N	Mississippi River	FEMA	Ecological	Enviromental	Wildfire	March
1129	C22029	Louisiana	LA	22	Concordia	Parish	22029	EMC	Y	N	N	N	Mississippi River	FEMA	Ecological	Enviromental	Wildfire	November
1129	C22029	Louisiana	LA	22	Concordia	Parish	22029	EMC	Y	N	N	N	Mississippi River	FEMA	Ecological	Enviromental	Wildfire	September
1129	C22029	Louisiana	LA	22	Concordia	Parish	22029	EMC	Y	N	N	N	Mississippi River	FEMA	Ecological	Enviromental	Wildfire	April
1129	C22029	Louisiana	LA	22	Concordia	Parish	22029	EMC	Y	N	N	N	Mississippi River	FEMA	Ecological	Enviromental	Wildfire	October
1419	C28033	Mississippi	MS	28	DeSoto	County	28033	EMC	Y	N	N	N	Mississippi River	FEMA	Metrological	Enviromental	Cold Wave	November
1419	C28033	Mississippi	MS	28	DeSoto	County	28033	EMC	Y	N	N	N	Mississippi River	FEMA	Metrological	Enviromental	Cold Wave	December
1419	C28033	Mississippi	MS	28	DeSoto	County	28033	EMC	Y	N	N	N	Mississippi River	FEMA	Metrological	Enviromental	Cold Wave	January
1419	C28033	Mississippi	MS	28	DeSoto	County	28033	EMC	Y	N	N	N	Mississippi River	FEMA	Metrological	Enviromental	Cold Wave	February
1419	C28033	Mississippi	MS	28	DeSoto	County	28033	EMC	Y	N	N	N	Mississippi River	FEMA	Metrological	Enviromental	Winter Weather	November
1419	C28033	Mississippi	MS	28	DeSoto	County	28033	EMC	Y	N	N	N	Mississippi River	FEMA	Metrological	Enviromental	Winter Weather	December
1419	C28033	Mississippi	MS	28	DeSoto	County	28033	EMC	Y	N	N	N	Mississippi River	FEMA	Metrological	Enviromental	Winter Weather	January
1419	C28033	Mississippi	MS	28	DeSoto	County	28033	EMC	Y	N	N	N	Mississippi River	FEMA	Metrological	Enviromental	Winter Weather	February
1419	C28033	Mississippi	MS	28	DeSoto	County	28033	EMC	Y	N	N	N	Mississippi River	FEMA	Metrological	Enviromental	Winter Weather	March
1419	C28033	Mississippi	MS	28	DeSoto	County	28033	EMC	Y	N	N	N	Mississippi River	FEMA	Metrological	Enviromental	Hurricane	November
1419	C28033	Mississippi	MS	28	DeSoto	County	28033	EMC	Y	N	N	N	Mississippi River	FEMA	Metrological	Enviromental	Hurricane	June
1419	C28033	Mississippi	MS	28	DeSoto	County	28033	EMC	Y	N	N	N	Mississippi River	FEMA	Metrological	Enviromental	Hurricane	July
1419	C28033	Mississippi	MS	28	DeSoto	County	28033	EMC	Y	N	N	N	Mississippi River	FEMA	Metrological	Enviromental	Hurricane	August
1419	C28033	Mississippi	MS	28	DeSoto	County	28033	EMC	Y	N	N	N	Mississippi River	FEMA	Metrological	Enviromental	Hurricane	September
1419	C28033	Mississippi	MS	28	DeSoto	County	28033	EMC	Y	N	N	N	Mississippi River	FEMA	Metrological	Enviromental	Hurricane	October
26	C01051	Alabama	AL	01	Elmore	County	01051	DA	Y	N	N	N	Alabama - Coosa	Lit	Maritime	Equity	Recreational Boating	August
26	C01051	Alabama	AL	01	Elmore	County	01051	DA	Y	N	N	N	Alabama - Coosa	Lit	Maritime	Equity	Recreational Boating	September
26	C01051	Alabama	AL	01	Elmore	County	01051	DA	Y	N	N	N	Alabama - Coosa	Lit	Maritime	Equity	Recreational Boating	May
27	C01053	Alabama	AL	01	Escambia	County	01053	EMC	N	N	N	N		FEMA	Metrological	Enviromental	Heat Wave	June
1419	C28033	Mississippi	MS	28	DeSoto	County	28033	EMC	Y	N	N	N	Mississippi River	FEMA	Metrological	Enviromental	Cold Wave	March
1419	C28033	Mississippi	MS	28	DeSoto	County	28033	BC	Y	N	N	N	Mississippi River	Lit	Fluvial	Enviromental	Low Water	November
1419	C28033	Mississippi	MS	28	DeSoto	County	28033	BC	Y	N	N	N	Mississippi River	Lit	Fluvial	Enviromental	Low Water	August
1419	C28033	Mississippi	MS	28	DeSoto	County	28033	BC	Y	N	N	N	Mississippi River	Lit	Fluvial	Enviromental	Low Water	September
1419	C28033	Mississippi	MS	28	DeSoto	County	28033	BC	Y	N	N	N	Mississippi River	Lit	Fluvial	Enviromental	Low Water	October
1419	C28033	Mississippi	MS	28	DeSoto	County	28033	BC	Y	N	N	N	Mississippi River	Lit	Fluvial	Enviromental	High Water	March
1419	C28033	Mississippi	MS	28	DeSoto	County	28033	BC	Y	N	N	N	Mississippi River	Lit	Fluvial	Enviromental	High Water	April
1419	C28033	Mississippi	MS	28	DeSoto	County	28033	BC	Y	N	N	N	Mississippi River	Lit	Fluvial	Enviromental	High Water	May
1419	C28033	Mississippi	MS	28	DeSoto	County	28033	EMC	Y	N	N	N	Mississippi River	FEMA	Non Seasonal	Enviromental	Volcano
1419	C28033	Mississippi	MS	28	DeSoto	County	28033	EMC	Y	N	N	N	Mississippi River	FEMA	Non Seasonal	Enviromental	Earthquake
1419	C28033	Mississippi	MS	28	DeSoto	County	28033	EMC	Y	N	N	N	Mississippi River	FEMA	Geotechnical	Enviromental	Avalanche
1419	C28033	Mississippi	MS	28	DeSoto	County	28033	EMC	Y	N	N	N	Mississippi River	FEMA	Non Seasonal	Enviromental	Tsunami
1419	C28033	Mississippi	MS	28	DeSoto	County	28033	EMC	Y	N	N	N	Mississippi River	FEMA	Metrological	Enviromental	Hail	February
1419	C28033	Mississippi	MS	28	DeSoto	County	28033	EMC	Y	N	N	N	Mississippi River	FEMA	Metrological	Enviromental	Hail	March
1419	C28033	Mississippi	MS	28	DeSoto	County	28033	EMC	Y	N	N	N	Mississippi River	FEMA	Metrological	Enviromental	Hail	April
1419	C28033	Mississippi	MS	28	DeSoto	County	28033	EMC	Y	N	N	N	Mississippi River	FEMA	Metrological	Enviromental	Hail	May
1419	C28033	Mississippi	MS	28	DeSoto	County	28033	EMC	Y	N	N	N	Mississippi River	FEMA	Metrological	Enviromental	Hail	June
1419	C28033	Mississippi	MS	28	DeSoto	County	28033	EMC	Y	N	N	N	Mississippi River	FEMA	Ecological	Enviromental	Wildfire	December
1419	C28033	Mississippi	MS	28	DeSoto	County	28033	EMC	Y	N	N	N	Mississippi River	FEMA	Ecological	Enviromental	Wildfire	February
1419	C28033	Mississippi	MS	28	DeSoto	County	28033	EMC	Y	N	N	N	Mississippi River	FEMA	Ecological	Enviromental	Wildfire	January
1419	C28033	Mississippi	MS	28	DeSoto	County	28033	EMC	Y	N	N	N	Mississippi River	FEMA	Ecological	Enviromental	Wildfire	March
1419	C28033	Mississippi	MS	28	DeSoto	County	28033	EMC	Y	N	N	N	Mississippi River	FEMA	Ecological	Enviromental	Wildfire	November
1419	C28033	Mississippi	MS	28	DeSoto	County	28033	EMC	Y	N	N	N	Mississippi River	FEMA	Ecological	Enviromental	Wildfire	September
1419	C28033	Mississippi	MS	28	DeSoto	County	28033	EMC	Y	N	N	N	Mississippi River	FEMA	Ecological	Enviromental	Wildfire	April
1419	C28033	Mississippi	MS	28	DeSoto	County	28033	EMC	Y	N	N	N	Mississippi River	FEMA	Ecological	Enviromental	Wildfire	October
1131	C22033	Louisiana	LA	22	East Baton Rouge	Parish	22033	EMC	Y	N	Y	N	Mississippi River	FEMA	Metrological	Enviromental	Cold Wave	November
1131	C22033	Louisiana	LA	22	East Baton Rouge	Parish	22033	EMC	Y	N	Y	N	Mississippi River	FEMA	Metrological	Enviromental	Cold Wave	December
1131	C22033	Louisiana	LA	22	East Baton Rouge	Parish	22033	EMC	Y	N	Y	N	Mississippi River	FEMA	Metrological	Enviromental	Cold Wave	January
1131	C22033	Louisiana	LA	22	East Baton Rouge	Parish	22033	EMC	Y	N	Y	N	Mississippi River	FEMA	Metrological	Enviromental	Cold Wave	February
1131	C22033	Louisiana	LA	22	East Baton Rouge	Parish	22033	EMC	Y	N	Y	N	Mississippi River	FEMA	Metrological	Enviromental	Winter Weather	November
1131	C22033	Louisiana	LA	22	East Baton Rouge	Parish	22033	EMC	Y	N	Y	N	Mississippi River	FEMA	Metrological	Enviromental	Winter Weather	December
1131	C22033	Louisiana	LA	22	East Baton Rouge	Parish	22033	EMC	Y	N	Y	N	Mississippi River	FEMA	Metrological	Enviromental	Winter Weather	January
1131	C22033	Louisiana	LA	22	East Baton Rouge	Parish	22033	EMC	Y	N	Y	N	Mississippi River	FEMA	Metrological	Enviromental	Winter Weather	February
1131	C22033	Louisiana	LA	22	East Baton Rouge	Parish	22033	EMC	Y	N	Y	N	Mississippi River	FEMA	Metrological	Enviromental	Winter Weather	March
1131	C22033	Louisiana	LA	22	East Baton Rouge	Parish	22033	EMC	Y	N	Y	N	Mississippi River	FEMA	Metrological	Enviromental	Hurricane	November
1131	C22033	Louisiana	LA	22	East Baton Rouge	Parish	22033	EMC	Y	N	Y	N	Mississippi River	FEMA	Metrological	Enviromental	Hurricane	June
1131	C22033	Louisiana	LA	22	East Baton Rouge	Parish	22033	EMC	Y	N	Y	N	Mississippi River	FEMA	Metrological	Enviromental	Hurricane	July
1131	C22033	Louisiana	LA	22	East Baton Rouge	Parish	22033	EMC	Y	N	Y	N	Mississippi River	FEMA	Metrological	Enviromental	Hurricane	August
1131	C22033	Louisiana	LA	22	East Baton Rouge	Parish	22033	EMC	Y	N	Y	N	Mississippi River	FEMA	Metrological	Enviromental	Hurricane	September
1131	C22033	Louisiana	LA	22	East Baton Rouge	Parish	22033	EMC	Y	N	Y	N	Mississippi River	FEMA	Metrological	Enviromental	Hurricane	October
27	C01053	Alabama	AL	01	Escambia	County	01053	EMC	N	N	N	N		FEMA	Metrological	Enviromental	Heat Wave	July
27	C01053	Alabama	AL	01	Escambia	County	01053	EMC	N	N	N	N		FEMA	Metrological	Enviromental	Heat Wave	August
27	C01053	Alabama	AL	01	Escambia	County	01053	EMC	N	N	N	N		FEMA	Metrological	Enviromental	Heat Wave	September
28	C01055	Alabama	AL	01	Etowah	County	01055	EMC	N	N	N	N		FEMA	Metrological	Enviromental	Heat Wave	June
1131	C22033	Louisiana	LA	22	East Baton Rouge	Parish	22033	DA	Y	N	Y	N	Mississippi River	Lit	Cultural	Equity	Mardi Gras	February
1131	C22033	Louisiana	LA	22	East Baton Rouge	Parish	22033	EMC	Y	N	Y	N	Mississippi River	FEMA	Metrological	Enviromental	Cold Wave	March
1131	C22033	Louisiana	LA	22	East Baton Rouge	Parish	22033	BC	Y	N	Y	N	Mississippi River	Lit	Fluvial	Enviromental	Low Water	November
1131	C22033	Louisiana	LA	22	East Baton Rouge	Parish	22033	BC	Y	N	Y	N	Mississippi River	Lit	Fluvial	Enviromental	Low Water	August
1131	C22033	Louisiana	LA	22	East Baton Rouge	Parish	22033	BC	Y	N	Y	N	Mississippi River	Lit	Fluvial	Enviromental	Low Water	September
1131	C22033	Louisiana	LA	22	East Baton Rouge	Parish	22033	BC	Y	N	Y	N	Mississippi River	Lit	Fluvial	Enviromental	Low Water	October
1131	C22033	Louisiana	LA	22	East Baton Rouge	Parish	22033	BC	Y	N	Y	N	Mississippi River	Lit	Fluvial	Enviromental	High Water	March
1131	C22033	Louisiana	LA	22	East Baton Rouge	Parish	22033	BC	Y	N	Y	N	Mississippi River	Lit	Fluvial	Enviromental	High Water	April
1131	C22033	Louisiana	LA	22	East Baton Rouge	Parish	22033	BC	Y	N	Y	N	Mississippi River	Lit	Fluvial	Enviromental	High Water	May
1131	C22033	Louisiana	LA	22	East Baton Rouge	Parish	22033	EMC	Y	N	Y	N	Mississippi River	FEMA	Non Seasonal	Enviromental	Volcano
1131	C22033	Louisiana	LA	22	East Baton Rouge	Parish	22033	EMC	Y	N	Y	N	Mississippi River	FEMA	Non Seasonal	Enviromental	Earthquake
1131	C22033	Louisiana	LA	22	East Baton Rouge	Parish	22033	EMC	Y	N	Y	N	Mississippi River	FEMA	Geotechnical	Enviromental	Avalanche
1131	C22033	Louisiana	LA	22	East Baton Rouge	Parish	22033	EMC	Y	N	Y	N	Mississippi River	FEMA	Non Seasonal	Enviromental	Tsunami
1131	C22033	Louisiana	LA	22	East Baton Rouge	Parish	22033	EMC	Y	N	Y	N	Mississippi River	FEMA	Metrological	Enviromental	Hail	February
1131	C22033	Louisiana	LA	22	East Baton Rouge	Parish	22033	EMC	Y	N	Y	N	Mississippi River	FEMA	Metrological	Enviromental	Hail	March
1131	C22033	Louisiana	LA	22	East Baton Rouge	Parish	22033	EMC	Y	N	Y	N	Mississippi River	FEMA	Metrological	Enviromental	Hail	April
1131	C22033	Louisiana	LA	22	East Baton Rouge	Parish	22033	EMC	Y	N	Y	N	Mississippi River	FEMA	Metrological	Enviromental	Hail	May
1131	C22033	Louisiana	LA	22	East Baton Rouge	Parish	22033	EMC	Y	N	Y	N	Mississippi River	FEMA	Metrological	Enviromental	Hail	June
1131	C22033	Louisiana	LA	22	East Baton Rouge	Parish	22033	EMC	Y	N	Y	N	Mississippi River	FEMA	Ecological	Enviromental	Wildfire	December
1131	C22033	Louisiana	LA	22	East Baton Rouge	Parish	22033	EMC	Y	N	Y	N	Mississippi River	FEMA	Ecological	Enviromental	Wildfire	February
1131	C22033	Louisiana	LA	22	East Baton Rouge	Parish	22033	EMC	Y	N	Y	N	Mississippi River	FEMA	Ecological	Enviromental	Wildfire	January
1131	C22033	Louisiana	LA	22	East Baton Rouge	Parish	22033	EMC	Y	N	Y	N	Mississippi River	FEMA	Ecological	Enviromental	Wildfire	March
1131	C22033	Louisiana	LA	22	East Baton Rouge	Parish	22033	EMC	Y	N	Y	N	Mississippi River	FEMA	Ecological	Enviromental	Wildfire	November
1131	C22033	Louisiana	LA	22	East Baton Rouge	Parish	22033	EMC	Y	N	Y	N	Mississippi River	FEMA	Ecological	Enviromental	Wildfire	September
1131	C22033	Louisiana	LA	22	East Baton Rouge	Parish	22033	EMC	Y	N	Y	N	Mississippi River	FEMA	Ecological	Enviromental	Wildfire	April
1131	C22033	Louisiana	LA	22	East Baton Rouge	Parish	22033	EMC	Y	N	Y	N	Mississippi River	FEMA	Ecological	Enviromental	Wildfire	October
1132	C22035	Louisiana	LA	22	East Carroll	Parish	22035	EMC	Y	N	N	N	Mississippi River	FEMA	Metrological	Enviromental	Cold Wave	November
1132	C22035	Louisiana	LA	22	East Carroll	Parish	22035	EMC	Y	N	N	N	Mississippi River	FEMA	Metrological	Enviromental	Cold Wave	December
1132	C22035	Louisiana	LA	22	East Carroll	Parish	22035	EMC	Y	N	N	N	Mississippi River	FEMA	Metrological	Enviromental	Cold Wave	January
1132	C22035	Louisiana	LA	22	East Carroll	Parish	22035	EMC	Y	N	N	N	Mississippi River	FEMA	Metrological	Enviromental	Cold Wave	February
1132	C22035	Louisiana	LA	22	East Carroll	Parish	22035	EMC	Y	N	N	N	Mississippi River	FEMA	Metrological	Enviromental	Winter Weather	November
1132	C22035	Louisiana	LA	22	East Carroll	Parish	22035	EMC	Y	N	N	N	Mississippi River	FEMA	Metrological	Enviromental	Winter Weather	December
1132	C22035	Louisiana	LA	22	East Carroll	Parish	22035	EMC	Y	N	N	N	Mississippi River	FEMA	Metrological	Enviromental	Winter Weather	January
1132	C22035	Louisiana	LA	22	East Carroll	Parish	22035	EMC	Y	N	N	N	Mississippi River	FEMA	Metrological	Enviromental	Winter Weather	February
1132	C22035	Louisiana	LA	22	East Carroll	Parish	22035	EMC	Y	N	N	N	Mississippi River	FEMA	Metrological	Enviromental	Winter Weather	March
1132	C22035	Louisiana	LA	22	East Carroll	Parish	22035	EMC	Y	N	N	N	Mississippi River	FEMA	Metrological	Enviromental	Hurricane	November
1132	C22035	Louisiana	LA	22	East Carroll	Parish	22035	EMC	Y	N	N	N	Mississippi River	FEMA	Metrological	Enviromental	Hurricane	June
1132	C22035	Louisiana	LA	22	East Carroll	Parish	22035	EMC	Y	N	N	N	Mississippi River	FEMA	Metrological	Enviromental	Hurricane	July
1132	C22035	Louisiana	LA	22	East Carroll	Parish	22035	EMC	Y	N	N	N	Mississippi River	FEMA	Metrological	Enviromental	Hurricane	August
1132	C22035	Louisiana	LA	22	East Carroll	Parish	22035	EMC	Y	N	N	N	Mississippi River	FEMA	Metrological	Enviromental	Hurricane	September
1132	C22035	Louisiana	LA	22	East Carroll	Parish	22035	EMC	Y	N	N	N	Mississippi River	FEMA	Metrological	Enviromental	Hurricane	October
28	C01055	Alabama	AL	01	Etowah	County	01055	EMC	N	N	N	N		FEMA	Metrological	Enviromental	Heat Wave	July
28	C01055	Alabama	AL	01	Etowah	County	01055	EMC	N	N	N	N		FEMA	Metrological	Enviromental	Heat Wave	August
28	C01055	Alabama	AL	01	Etowah	County	01055	EMC	N	N	N	N		FEMA	Metrological	Enviromental	Heat Wave	September
29	C01057	Alabama	AL	01	Fayette	County	01057	EMC	N	N	N	N		FEMA	Metrological	Enviromental	Heat Wave	June
1132	C22035	Louisiana	LA	22	East Carroll	Parish	22035	EMC	Y	N	N	N	Mississippi River	FEMA	Metrological	Enviromental	Cold Wave	March
1132	C22035	Louisiana	LA	22	East Carroll	Parish	22035	BC	Y	N	N	N	Mississippi River	Lit	Fluvial	Enviromental	Low Water	November
1132	C22035	Louisiana	LA	22	East Carroll	Parish	22035	BC	Y	N	N	N	Mississippi River	Lit	Fluvial	Enviromental	Low Water	August
1132	C22035	Louisiana	LA	22	East Carroll	Parish	22035	BC	Y	N	N	N	Mississippi River	Lit	Fluvial	Enviromental	Low Water	September
1132	C22035	Louisiana	LA	22	East Carroll	Parish	22035	BC	Y	N	N	N	Mississippi River	Lit	Fluvial	Enviromental	Low Water	October
1132	C22035	Louisiana	LA	22	East Carroll	Parish	22035	BC	Y	N	N	N	Mississippi River	Lit	Fluvial	Enviromental	High Water	March
1132	C22035	Louisiana	LA	22	East Carroll	Parish	22035	BC	Y	N	N	N	Mississippi River	Lit	Fluvial	Enviromental	High Water	April
1132	C22035	Louisiana	LA	22	East Carroll	Parish	22035	BC	Y	N	N	N	Mississippi River	Lit	Fluvial	Enviromental	High Water	May
1132	C22035	Louisiana	LA	22	East Carroll	Parish	22035	EMC	Y	N	N	N	Mississippi River	FEMA	Non Seasonal	Enviromental	Volcano
1132	C22035	Louisiana	LA	22	East Carroll	Parish	22035	EMC	Y	N	N	N	Mississippi River	FEMA	Non Seasonal	Enviromental	Earthquake
1132	C22035	Louisiana	LA	22	East Carroll	Parish	22035	EMC	Y	N	N	N	Mississippi River	FEMA	Geotechnical	Enviromental	Avalanche
1132	C22035	Louisiana	LA	22	East Carroll	Parish	22035	EMC	Y	N	N	N	Mississippi River	FEMA	Non Seasonal	Enviromental	Tsunami
1132	C22035	Louisiana	LA	22	East Carroll	Parish	22035	EMC	Y	N	N	N	Mississippi River	FEMA	Metrological	Enviromental	Hail	February
1132	C22035	Louisiana	LA	22	East Carroll	Parish	22035	EMC	Y	N	N	N	Mississippi River	FEMA	Metrological	Enviromental	Hail	March
1132	C22035	Louisiana	LA	22	East Carroll	Parish	22035	EMC	Y	N	N	N	Mississippi River	FEMA	Metrological	Enviromental	Hail	April
1132	C22035	Louisiana	LA	22	East Carroll	Parish	22035	EMC	Y	N	N	N	Mississippi River	FEMA	Metrological	Enviromental	Hail	May
1132	C22035	Louisiana	LA	22	East Carroll	Parish	22035	EMC	Y	N	N	N	Mississippi River	FEMA	Metrological	Enviromental	Hail	June
1132	C22035	Louisiana	LA	22	East Carroll	Parish	22035	EMC	Y	N	N	N	Mississippi River	FEMA	Ecological	Enviromental	Wildfire	December
1132	C22035	Louisiana	LA	22	East Carroll	Parish	22035	EMC	Y	N	N	N	Mississippi River	FEMA	Ecological	Enviromental	Wildfire	February
1132	C22035	Louisiana	LA	22	East Carroll	Parish	22035	EMC	Y	N	N	N	Mississippi River	FEMA	Ecological	Enviromental	Wildfire	January
1132	C22035	Louisiana	LA	22	East Carroll	Parish	22035	EMC	Y	N	N	N	Mississippi River	FEMA	Ecological	Enviromental	Wildfire	March
1132	C22035	Louisiana	LA	22	East Carroll	Parish	22035	EMC	Y	N	N	N	Mississippi River	FEMA	Ecological	Enviromental	Wildfire	November
1132	C22035	Louisiana	LA	22	East Carroll	Parish	22035	EMC	Y	N	N	N	Mississippi River	FEMA	Ecological	Enviromental	Wildfire	September
1132	C22035	Louisiana	LA	22	East Carroll	Parish	22035	EMC	Y	N	N	N	Mississippi River	FEMA	Ecological	Enviromental	Wildfire	April
1132	C22035	Louisiana	LA	22	East Carroll	Parish	22035	EMC	Y	N	N	N	Mississippi River	FEMA	Ecological	Enviromental	Wildfire	October
1133	C22037	Louisiana	LA	22	East Feliciana	Parish	22037	EMC	N	N	N	N	Mississippi River	FEMA	Metrological	Enviromental	Cold Wave	November
1133	C22037	Louisiana	LA	22	East Feliciana	Parish	22037	EMC	N	N	N	N	Mississippi River	FEMA	Metrological	Enviromental	Cold Wave	December
1133	C22037	Louisiana	LA	22	East Feliciana	Parish	22037	EMC	N	N	N	N	Mississippi River	FEMA	Metrological	Enviromental	Cold Wave	January
1133	C22037	Louisiana	LA	22	East Feliciana	Parish	22037	EMC	N	N	N	N	Mississippi River	FEMA	Metrological	Enviromental	Cold Wave	February
1133	C22037	Louisiana	LA	22	East Feliciana	Parish	22037	EMC	N	N	N	N	Mississippi River	FEMA	Metrological	Enviromental	Winter Weather	November
1133	C22037	Louisiana	LA	22	East Feliciana	Parish	22037	EMC	N	N	N	N	Mississippi River	FEMA	Metrological	Enviromental	Winter Weather	December
1133	C22037	Louisiana	LA	22	East Feliciana	Parish	22037	EMC	N	N	N	N	Mississippi River	FEMA	Metrological	Enviromental	Winter Weather	January
1133	C22037	Louisiana	LA	22	East Feliciana	Parish	22037	EMC	N	N	N	N	Mississippi River	FEMA	Metrological	Enviromental	Winter Weather	February
1133	C22037	Louisiana	LA	22	East Feliciana	Parish	22037	EMC	N	N	N	N	Mississippi River	FEMA	Metrological	Enviromental	Winter Weather	March
1133	C22037	Louisiana	LA	22	East Feliciana	Parish	22037	EMC	N	N	N	N	Mississippi River	FEMA	Metrological	Enviromental	Hurricane	November
1133	C22037	Louisiana	LA	22	East Feliciana	Parish	22037	EMC	N	N	N	N	Mississippi River	FEMA	Metrological	Enviromental	Hurricane	June
1133	C22037	Louisiana	LA	22	East Feliciana	Parish	22037	EMC	N	N	N	N	Mississippi River	FEMA	Metrological	Enviromental	Hurricane	July
1133	C22037	Louisiana	LA	22	East Feliciana	Parish	22037	EMC	N	N	N	N	Mississippi River	FEMA	Metrological	Enviromental	Hurricane	August
1133	C22037	Louisiana	LA	22	East Feliciana	Parish	22037	EMC	N	N	N	N	Mississippi River	FEMA	Metrological	Enviromental	Hurricane	September
1133	C22037	Louisiana	LA	22	East Feliciana	Parish	22037	EMC	N	N	N	N	Mississippi River	FEMA	Metrological	Enviromental	Hurricane	October
29	C01057	Alabama	AL	01	Fayette	County	01057	EMC	N	N	N	N		FEMA	Metrological	Enviromental	Heat Wave	July
29	C01057	Alabama	AL	01	Fayette	County	01057	EMC	N	N	N	N		FEMA	Metrological	Enviromental	Heat Wave	August
29	C01057	Alabama	AL	01	Fayette	County	01057	EMC	N	N	N	N		FEMA	Metrological	Enviromental	Heat Wave	September
30	C01059	Alabama	AL	01	Franklin	County	01059	EMC	N	N	N	N		FEMA	Metrological	Enviromental	Heat Wave	June
1133	C22037	Louisiana	LA	22	East Feliciana	Parish	22037	EMC	N	N	N	N	Mississippi River	FEMA	Metrological	Enviromental	Cold Wave	March
1133	C22037	Louisiana	LA	22	East Feliciana	Parish	22037	EMC	N	N	N	N	Mississippi River	FEMA	Non Seasonal	Enviromental	Volcano
1133	C22037	Louisiana	LA	22	East Feliciana	Parish	22037	EMC	N	N	N	N	Mississippi River	FEMA	Non Seasonal	Enviromental	Earthquake
1133	C22037	Louisiana	LA	22	East Feliciana	Parish	22037	EMC	N	N	N	N	Mississippi River	FEMA	Geotechnical	Enviromental	Avalanche
1133	C22037	Louisiana	LA	22	East Feliciana	Parish	22037	EMC	N	N	N	N	Mississippi River	FEMA	Non Seasonal	Enviromental	Tsunami
1133	C22037	Louisiana	LA	22	East Feliciana	Parish	22037	EMC	N	N	N	N	Mississippi River	FEMA	Ecological	Enviromental	Wildfire	December
1133	C22037	Louisiana	LA	22	East Feliciana	Parish	22037	EMC	N	N	N	N	Mississippi River	FEMA	Ecological	Enviromental	Wildfire	February
1133	C22037	Louisiana	LA	22	East Feliciana	Parish	22037	EMC	N	N	N	N	Mississippi River	FEMA	Ecological	Enviromental	Wildfire	January
1133	C22037	Louisiana	LA	22	East Feliciana	Parish	22037	EMC	N	N	N	N	Mississippi River	FEMA	Ecological	Enviromental	Wildfire	March
1133	C22037	Louisiana	LA	22	East Feliciana	Parish	22037	EMC	N	N	N	N	Mississippi River	FEMA	Ecological	Enviromental	Wildfire	November
1133	C22037	Louisiana	LA	22	East Feliciana	Parish	22037	EMC	N	N	N	N	Mississippi River	FEMA	Ecological	Enviromental	Wildfire	September
1133	C22037	Louisiana	LA	22	East Feliciana	Parish	22037	EMC	N	N	N	N	Mississippi River	FEMA	Ecological	Enviromental	Wildfire	April
1133	C22037	Louisiana	LA	22	East Feliciana	Parish	22037	EMC	N	N	N	N	Mississippi River	FEMA	Ecological	Enviromental	Wildfire	October
1133	C22037	Louisiana	LA	22	East Feliciana	Parish	22037	EMC	N	N	N	N	Mississippi River	FEMA	Metrological	Enviromental	Hail	February
1133	C22037	Louisiana	LA	22	East Feliciana	Parish	22037	EMC	N	N	N	N	Mississippi River	FEMA	Metrological	Enviromental	Hail	March
1133	C22037	Louisiana	LA	22	East Feliciana	Parish	22037	EMC	N	N	N	N	Mississippi River	FEMA	Metrological	Enviromental	Hail	April
1133	C22037	Louisiana	LA	22	East Feliciana	Parish	22037	EMC	N	N	N	N	Mississippi River	FEMA	Metrological	Enviromental	Hail	May
1133	C22037	Louisiana	LA	22	East Feliciana	Parish	22037	EMC	N	N	N	N	Mississippi River	FEMA	Metrological	Enviromental	Hail	June
1138	C22047	Louisiana	LA	22	Iberville	Parish	22047	EMC	Y	N	Y	Y	Mississippi River	FEMA	Metrological	Enviromental	Cold Wave	November
1138	C22047	Louisiana	LA	22	Iberville	Parish	22047	EMC	Y	N	Y	Y	Mississippi River	FEMA	Metrological	Enviromental	Cold Wave	December
1138	C22047	Louisiana	LA	22	Iberville	Parish	22047	EMC	Y	N	Y	Y	Mississippi River	FEMA	Metrological	Enviromental	Cold Wave	January
1138	C22047	Louisiana	LA	22	Iberville	Parish	22047	EMC	Y	N	Y	Y	Mississippi River	FEMA	Metrological	Enviromental	Cold Wave	February
1138	C22047	Louisiana	LA	22	Iberville	Parish	22047	EMC	Y	N	Y	Y	Mississippi River	FEMA	Metrological	Enviromental	Winter Weather	November
1138	C22047	Louisiana	LA	22	Iberville	Parish	22047	EMC	Y	N	Y	Y	Mississippi River	FEMA	Metrological	Enviromental	Winter Weather	December
1138	C22047	Louisiana	LA	22	Iberville	Parish	22047	EMC	Y	N	Y	Y	Mississippi River	FEMA	Metrological	Enviromental	Winter Weather	January
1138	C22047	Louisiana	LA	22	Iberville	Parish	22047	EMC	Y	N	Y	Y	Mississippi River	FEMA	Metrological	Enviromental	Winter Weather	February
1138	C22047	Louisiana	LA	22	Iberville	Parish	22047	EMC	Y	N	Y	Y	Mississippi River	FEMA	Metrological	Enviromental	Winter Weather	March
1138	C22047	Louisiana	LA	22	Iberville	Parish	22047	EMC	Y	N	Y	Y	Mississippi River	FEMA	Metrological	Enviromental	Hurricane	November
1138	C22047	Louisiana	LA	22	Iberville	Parish	22047	EMC	Y	N	Y	Y	Mississippi River	FEMA	Metrological	Enviromental	Hurricane	June
1138	C22047	Louisiana	LA	22	Iberville	Parish	22047	EMC	Y	N	Y	Y	Mississippi River	FEMA	Metrological	Enviromental	Hurricane	July
1138	C22047	Louisiana	LA	22	Iberville	Parish	22047	EMC	Y	N	Y	Y	Mississippi River	FEMA	Metrological	Enviromental	Hurricane	August
1138	C22047	Louisiana	LA	22	Iberville	Parish	22047	EMC	Y	N	Y	Y	Mississippi River	FEMA	Metrological	Enviromental	Hurricane	September
1138	C22047	Louisiana	LA	22	Iberville	Parish	22047	EMC	Y	N	Y	Y	Mississippi River	FEMA	Metrological	Enviromental	Hurricane	October
30	C01059	Alabama	AL	01	Franklin	County	01059	EMC	N	N	N	N		FEMA	Metrological	Enviromental	Heat Wave	July
30	C01059	Alabama	AL	01	Franklin	County	01059	EMC	N	N	N	N		FEMA	Metrological	Enviromental	Heat Wave	August
30	C01059	Alabama	AL	01	Franklin	County	01059	EMC	N	N	N	N		FEMA	Metrological	Enviromental	Heat Wave	September
31	C01061	Alabama	AL	01	Geneva	County	01061	EMC	N	N	N	N		FEMA	Metrological	Enviromental	Heat Wave	June
1138	C22047	Louisiana	LA	22	Iberville	Parish	22047	DA	Y	N	Y	Y	Mississippi River	Lit	Cultural	Equity	Mardi Gras	February
1138	C22047	Louisiana	LA	22	Iberville	Parish	22047	EMC	Y	N	Y	Y	Mississippi River	FEMA	Metrological	Enviromental	Cold Wave	March
1138	C22047	Louisiana	LA	22	Iberville	Parish	22047	BC	Y	N	Y	Y	Mississippi River	Lit	Fluvial	Enviromental	Low Water	November
1138	C22047	Louisiana	LA	22	Iberville	Parish	22047	BC	Y	N	Y	Y	Mississippi River	Lit	Fluvial	Enviromental	Low Water	August
1138	C22047	Louisiana	LA	22	Iberville	Parish	22047	BC	Y	N	Y	Y	Mississippi River	Lit	Fluvial	Enviromental	Low Water	September
1138	C22047	Louisiana	LA	22	Iberville	Parish	22047	BC	Y	N	Y	Y	Mississippi River	Lit	Fluvial	Enviromental	Low Water	October
1138	C22047	Louisiana	LA	22	Iberville	Parish	22047	BC	Y	N	Y	Y	Mississippi River	Lit	Fluvial	Enviromental	High Water	March
1138	C22047	Louisiana	LA	22	Iberville	Parish	22047	BC	Y	N	Y	Y	Mississippi River	Lit	Fluvial	Enviromental	High Water	April
1138	C22047	Louisiana	LA	22	Iberville	Parish	22047	BC	Y	N	Y	Y	Mississippi River	Lit	Fluvial	Enviromental	High Water	May
1138	C22047	Louisiana	LA	22	Iberville	Parish	22047	EMC	Y	N	Y	Y	Mississippi River	FEMA	Non Seasonal	Enviromental	Volcano
1138	C22047	Louisiana	LA	22	Iberville	Parish	22047	EMC	Y	N	Y	Y	Mississippi River	FEMA	Non Seasonal	Enviromental	Earthquake
1138	C22047	Louisiana	LA	22	Iberville	Parish	22047	EMC	Y	N	Y	Y	Mississippi River	FEMA	Geotechnical	Enviromental	Avalanche
1138	C22047	Louisiana	LA	22	Iberville	Parish	22047	EMC	Y	N	Y	Y	Mississippi River	FEMA	Non Seasonal	Enviromental	Tsunami
1138	C22047	Louisiana	LA	22	Iberville	Parish	22047	EMC	Y	N	Y	Y	Mississippi River	FEMA	Metrological	Enviromental	Hail	February
1138	C22047	Louisiana	LA	22	Iberville	Parish	22047	EMC	Y	N	Y	Y	Mississippi River	FEMA	Metrological	Enviromental	Hail	March
1138	C22047	Louisiana	LA	22	Iberville	Parish	22047	EMC	Y	N	Y	Y	Mississippi River	FEMA	Metrological	Enviromental	Hail	April
1138	C22047	Louisiana	LA	22	Iberville	Parish	22047	EMC	Y	N	Y	Y	Mississippi River	FEMA	Metrological	Enviromental	Hail	May
1138	C22047	Louisiana	LA	22	Iberville	Parish	22047	EMC	Y	N	Y	Y	Mississippi River	FEMA	Metrological	Enviromental	Hail	June
1138	C22047	Louisiana	LA	22	Iberville	Parish	22047	EMC	Y	N	Y	Y	Mississippi River	FEMA	Ecological	Enviromental	Wildfire	December
1138	C22047	Louisiana	LA	22	Iberville	Parish	22047	EMC	Y	N	Y	Y	Mississippi River	FEMA	Ecological	Enviromental	Wildfire	February
1138	C22047	Louisiana	LA	22	Iberville	Parish	22047	EMC	Y	N	Y	Y	Mississippi River	FEMA	Ecological	Enviromental	Wildfire	January
1138	C22047	Louisiana	LA	22	Iberville	Parish	22047	EMC	Y	N	Y	Y	Mississippi River	FEMA	Ecological	Enviromental	Wildfire	March
1138	C22047	Louisiana	LA	22	Iberville	Parish	22047	EMC	Y	N	Y	Y	Mississippi River	FEMA	Ecological	Enviromental	Wildfire	November
1138	C22047	Louisiana	LA	22	Iberville	Parish	22047	EMC	Y	N	Y	Y	Mississippi River	FEMA	Ecological	Enviromental	Wildfire	September
1138	C22047	Louisiana	LA	22	Iberville	Parish	22047	EMC	Y	N	Y	Y	Mississippi River	FEMA	Ecological	Enviromental	Wildfire	April
1138	C22047	Louisiana	LA	22	Iberville	Parish	22047	EMC	Y	N	Y	Y	Mississippi River	FEMA	Ecological	Enviromental	Wildfire	October
1430	C28055	Mississippi	MS	28	Issaquena	County	28055	EMC	Y	N	N	N	Mississippi River	FEMA	Metrological	Enviromental	Cold Wave	November
1430	C28055	Mississippi	MS	28	Issaquena	County	28055	EMC	Y	N	N	N	Mississippi River	FEMA	Metrological	Enviromental	Cold Wave	December
1430	C28055	Mississippi	MS	28	Issaquena	County	28055	EMC	Y	N	N	N	Mississippi River	FEMA	Metrological	Enviromental	Cold Wave	January
1430	C28055	Mississippi	MS	28	Issaquena	County	28055	EMC	Y	N	N	N	Mississippi River	FEMA	Metrological	Enviromental	Cold Wave	February
1430	C28055	Mississippi	MS	28	Issaquena	County	28055	EMC	Y	N	N	N	Mississippi River	FEMA	Metrological	Enviromental	Winter Weather	November
1430	C28055	Mississippi	MS	28	Issaquena	County	28055	EMC	Y	N	N	N	Mississippi River	FEMA	Metrological	Enviromental	Winter Weather	December
1430	C28055	Mississippi	MS	28	Issaquena	County	28055	EMC	Y	N	N	N	Mississippi River	FEMA	Metrological	Enviromental	Winter Weather	January
1430	C28055	Mississippi	MS	28	Issaquena	County	28055	EMC	Y	N	N	N	Mississippi River	FEMA	Metrological	Enviromental	Winter Weather	February
1430	C28055	Mississippi	MS	28	Issaquena	County	28055	EMC	Y	N	N	N	Mississippi River	FEMA	Metrological	Enviromental	Winter Weather	March
1430	C28055	Mississippi	MS	28	Issaquena	County	28055	EMC	Y	N	N	N	Mississippi River	FEMA	Metrological	Enviromental	Hurricane	November
1430	C28055	Mississippi	MS	28	Issaquena	County	28055	EMC	Y	N	N	N	Mississippi River	FEMA	Metrological	Enviromental	Hurricane	June
1430	C28055	Mississippi	MS	28	Issaquena	County	28055	EMC	Y	N	N	N	Mississippi River	FEMA	Metrological	Enviromental	Hurricane	July
1430	C28055	Mississippi	MS	28	Issaquena	County	28055	EMC	Y	N	N	N	Mississippi River	FEMA	Metrological	Enviromental	Hurricane	August
1430	C28055	Mississippi	MS	28	Issaquena	County	28055	EMC	Y	N	N	N	Mississippi River	FEMA	Metrological	Enviromental	Hurricane	September
1430	C28055	Mississippi	MS	28	Issaquena	County	28055	EMC	Y	N	N	N	Mississippi River	FEMA	Metrological	Enviromental	Hurricane	October
31	C01061	Alabama	AL	01	Geneva	County	01061	EMC	N	N	N	N		FEMA	Metrological	Enviromental	Heat Wave	July
31	C01061	Alabama	AL	01	Geneva	County	01061	EMC	N	N	N	N		FEMA	Metrological	Enviromental	Heat Wave	August
31	C01061	Alabama	AL	01	Geneva	County	01061	EMC	N	N	N	N		FEMA	Metrological	Enviromental	Heat Wave	September
32	C01063	Alabama	AL	01	Greene	County	01063	EMC	Y	N	N	N	Tenn-Tom, Black Warrior-Tombigbee	Lit	Metrological	Enviromental	Heat Wave	June
1430	C28055	Mississippi	MS	28	Issaquena	County	28055	EMC	Y	N	N	N	Mississippi River	FEMA	Metrological	Enviromental	Cold Wave	March
1430	C28055	Mississippi	MS	28	Issaquena	County	28055	BC	Y	N	N	N	Mississippi River	Lit	Fluvial	Enviromental	Low Water	November
1430	C28055	Mississippi	MS	28	Issaquena	County	28055	BC	Y	N	N	N	Mississippi River	Lit	Fluvial	Enviromental	Low Water	August
1430	C28055	Mississippi	MS	28	Issaquena	County	28055	BC	Y	N	N	N	Mississippi River	Lit	Fluvial	Enviromental	Low Water	September
1430	C28055	Mississippi	MS	28	Issaquena	County	28055	BC	Y	N	N	N	Mississippi River	Lit	Fluvial	Enviromental	Low Water	October
1430	C28055	Mississippi	MS	28	Issaquena	County	28055	BC	Y	N	N	N	Mississippi River	Lit	Fluvial	Enviromental	High Water	March
1430	C28055	Mississippi	MS	28	Issaquena	County	28055	BC	Y	N	N	N	Mississippi River	Lit	Fluvial	Enviromental	High Water	April
1430	C28055	Mississippi	MS	28	Issaquena	County	28055	BC	Y	N	N	N	Mississippi River	Lit	Fluvial	Enviromental	High Water	May
1430	C28055	Mississippi	MS	28	Issaquena	County	28055	EMC	Y	N	N	N	Mississippi River	FEMA	Non Seasonal	Enviromental	Volcano
1430	C28055	Mississippi	MS	28	Issaquena	County	28055	EMC	Y	N	N	N	Mississippi River	FEMA	Non Seasonal	Enviromental	Earthquake
1430	C28055	Mississippi	MS	28	Issaquena	County	28055	EMC	Y	N	N	N	Mississippi River	FEMA	Geotechnical	Enviromental	Avalanche
1430	C28055	Mississippi	MS	28	Issaquena	County	28055	EMC	Y	N	N	N	Mississippi River	FEMA	Non Seasonal	Enviromental	Tsunami
1430	C28055	Mississippi	MS	28	Issaquena	County	28055	EMC	Y	N	N	N	Mississippi River	FEMA	Metrological	Enviromental	Hail	February
1430	C28055	Mississippi	MS	28	Issaquena	County	28055	EMC	Y	N	N	N	Mississippi River	FEMA	Metrological	Enviromental	Hail	March
1430	C28055	Mississippi	MS	28	Issaquena	County	28055	EMC	Y	N	N	N	Mississippi River	FEMA	Metrological	Enviromental	Hail	April
1430	C28055	Mississippi	MS	28	Issaquena	County	28055	EMC	Y	N	N	N	Mississippi River	FEMA	Metrological	Enviromental	Hail	May
1430	C28055	Mississippi	MS	28	Issaquena	County	28055	EMC	Y	N	N	N	Mississippi River	FEMA	Metrological	Enviromental	Hail	June
1430	C28055	Mississippi	MS	28	Issaquena	County	28055	EMC	Y	N	N	N	Mississippi River	FEMA	Ecological	Enviromental	Wildfire	December
1430	C28055	Mississippi	MS	28	Issaquena	County	28055	EMC	Y	N	N	N	Mississippi River	FEMA	Ecological	Enviromental	Wildfire	February
1430	C28055	Mississippi	MS	28	Issaquena	County	28055	EMC	Y	N	N	N	Mississippi River	FEMA	Ecological	Enviromental	Wildfire	January
1430	C28055	Mississippi	MS	28	Issaquena	County	28055	EMC	Y	N	N	N	Mississippi River	FEMA	Ecological	Enviromental	Wildfire	March
1430	C28055	Mississippi	MS	28	Issaquena	County	28055	EMC	Y	N	N	N	Mississippi River	FEMA	Ecological	Enviromental	Wildfire	November
1430	C28055	Mississippi	MS	28	Issaquena	County	28055	EMC	Y	N	N	N	Mississippi River	FEMA	Ecological	Enviromental	Wildfire	September
1430	C28055	Mississippi	MS	28	Issaquena	County	28055	EMC	Y	N	N	N	Mississippi River	FEMA	Ecological	Enviromental	Wildfire	April
1430	C28055	Mississippi	MS	28	Issaquena	County	28055	EMC	Y	N	N	N	Mississippi River	FEMA	Ecological	Enviromental	Wildfire	October
1434	C28063	Mississippi	MS	28	Jefferson	County	28063	EMC	Y	N	Y	N	Mississippi River	FEMA	Metrological	Enviromental	Cold Wave	November
1434	C28063	Mississippi	MS	28	Jefferson	County	28063	EMC	Y	N	Y	N	Mississippi River	FEMA	Metrological	Enviromental	Cold Wave	December
1434	C28063	Mississippi	MS	28	Jefferson	County	28063	EMC	Y	N	Y	N	Mississippi River	FEMA	Metrological	Enviromental	Cold Wave	January
1434	C28063	Mississippi	MS	28	Jefferson	County	28063	EMC	Y	N	Y	N	Mississippi River	FEMA	Metrological	Enviromental	Cold Wave	February
1434	C28063	Mississippi	MS	28	Jefferson	County	28063	EMC	Y	N	Y	N	Mississippi River	FEMA	Metrological	Enviromental	Winter Weather	November
1434	C28063	Mississippi	MS	28	Jefferson	County	28063	EMC	Y	N	Y	N	Mississippi River	FEMA	Metrological	Enviromental	Winter Weather	December
1434	C28063	Mississippi	MS	28	Jefferson	County	28063	EMC	Y	N	Y	N	Mississippi River	FEMA	Metrological	Enviromental	Winter Weather	January
1434	C28063	Mississippi	MS	28	Jefferson	County	28063	EMC	Y	N	Y	N	Mississippi River	FEMA	Metrological	Enviromental	Winter Weather	February
1434	C28063	Mississippi	MS	28	Jefferson	County	28063	EMC	Y	N	Y	N	Mississippi River	FEMA	Metrological	Enviromental	Winter Weather	March
1434	C28063	Mississippi	MS	28	Jefferson	County	28063	EMC	Y	N	Y	N	Mississippi River	FEMA	Metrological	Enviromental	Hurricane	November
1434	C28063	Mississippi	MS	28	Jefferson	County	28063	EMC	Y	N	Y	N	Mississippi River	FEMA	Metrological	Enviromental	Hurricane	June
1434	C28063	Mississippi	MS	28	Jefferson	County	28063	EMC	Y	N	Y	N	Mississippi River	FEMA	Metrological	Enviromental	Hurricane	July
1434	C28063	Mississippi	MS	28	Jefferson	County	28063	EMC	Y	N	Y	N	Mississippi River	FEMA	Metrological	Enviromental	Hurricane	August
1434	C28063	Mississippi	MS	28	Jefferson	County	28063	EMC	Y	N	Y	N	Mississippi River	FEMA	Metrological	Enviromental	Hurricane	September
1434	C28063	Mississippi	MS	28	Jefferson	County	28063	EMC	Y	N	Y	N	Mississippi River	FEMA	Metrological	Enviromental	Hurricane	October
1434	C28063	Mississippi	MS	28	Jefferson	County	28063	BC	Y	N	Y	N	Mississippi River	Lit	Ecological	Enviromental	Termite Swarm	May
32	C01063	Alabama	AL	01	Greene	County	01063	EMC	Y	N	N	N	Tenn-Tom, Black Warrior-Tombigbee	FEMA	Metrological	Enviromental	Heat Wave	July
32	C01063	Alabama	AL	01	Greene	County	01063	EMC	Y	N	N	N	Tenn-Tom, Black Warrior-Tombigbee	FEMA	Metrological	Enviromental	Heat Wave	August
32	C01063	Alabama	AL	01	Greene	County	01063	EMC	Y	N	N	N	Tenn-Tom, Black Warrior-Tombigbee	FEMA	Metrological	Enviromental	Heat Wave	September
32	C01063	Alabama	AL	01	Greene	County	01063	DA	Y	N	N	N	Tenn-Tom, Black Warrior-Tombigbee	Lit	Maritime	Equity	Recreational Boating	June
1434	C28063	Mississippi	MS	28	Jefferson	County	28063	EMC	Y	N	Y	N	Mississippi River	FEMA	Metrological	Enviromental	Cold Wave	March
1434	C28063	Mississippi	MS	28	Jefferson	County	28063	BC	Y	N	Y	N	Mississippi River	Lit	Fluvial	Enviromental	Low Water	November
1434	C28063	Mississippi	MS	28	Jefferson	County	28063	BC	Y	N	Y	N	Mississippi River	Lit	Fluvial	Enviromental	Low Water	August
1434	C28063	Mississippi	MS	28	Jefferson	County	28063	BC	Y	N	Y	N	Mississippi River	Lit	Fluvial	Enviromental	Low Water	September
1434	C28063	Mississippi	MS	28	Jefferson	County	28063	BC	Y	N	Y	N	Mississippi River	Lit	Fluvial	Enviromental	Low Water	October
1434	C28063	Mississippi	MS	28	Jefferson	County	28063	BC	Y	N	Y	N	Mississippi River	Lit	Fluvial	Enviromental	High Water	March
1434	C28063	Mississippi	MS	28	Jefferson	County	28063	BC	Y	N	Y	N	Mississippi River	Lit	Fluvial	Enviromental	High Water	April
1434	C28063	Mississippi	MS	28	Jefferson	County	28063	BC	Y	N	Y	N	Mississippi River	Lit	Fluvial	Enviromental	High Water	May
1434	C28063	Mississippi	MS	28	Jefferson	County	28063	EMC	Y	N	Y	N	Mississippi River	FEMA	Non Seasonal	Enviromental	Volcano
1434	C28063	Mississippi	MS	28	Jefferson	County	28063	EMC	Y	N	Y	N	Mississippi River	FEMA	Non Seasonal	Enviromental	Earthquake
1434	C28063	Mississippi	MS	28	Jefferson	County	28063	EMC	Y	N	Y	N	Mississippi River	FEMA	Geotechnical	Enviromental	Avalanche
1434	C28063	Mississippi	MS	28	Jefferson	County	28063	EMC	Y	N	Y	N	Mississippi River	FEMA	Non Seasonal	Enviromental	Tsunami
1434	C28063	Mississippi	MS	28	Jefferson	County	28063	EMC	Y	N	Y	N	Mississippi River	FEMA	Metrological	Enviromental	Hail	February
1434	C28063	Mississippi	MS	28	Jefferson	County	28063	EMC	Y	N	Y	N	Mississippi River	FEMA	Metrological	Enviromental	Hail	March
1434	C28063	Mississippi	MS	28	Jefferson	County	28063	EMC	Y	N	Y	N	Mississippi River	FEMA	Metrological	Enviromental	Hail	April
1434	C28063	Mississippi	MS	28	Jefferson	County	28063	EMC	Y	N	Y	N	Mississippi River	FEMA	Metrological	Enviromental	Hail	May
1434	C28063	Mississippi	MS	28	Jefferson	County	28063	EMC	Y	N	Y	N	Mississippi River	FEMA	Metrological	Enviromental	Hail	June
1434	C28063	Mississippi	MS	28	Jefferson	County	28063	EMC	Y	N	Y	N	Mississippi River	FEMA	Ecological	Enviromental	Wildfire	December
1434	C28063	Mississippi	MS	28	Jefferson	County	28063	EMC	Y	N	Y	N	Mississippi River	FEMA	Ecological	Enviromental	Wildfire	February
1434	C28063	Mississippi	MS	28	Jefferson	County	28063	EMC	Y	N	Y	N	Mississippi River	FEMA	Ecological	Enviromental	Wildfire	January
1434	C28063	Mississippi	MS	28	Jefferson	County	28063	EMC	Y	N	Y	N	Mississippi River	FEMA	Ecological	Enviromental	Wildfire	March
1434	C28063	Mississippi	MS	28	Jefferson	County	28063	EMC	Y	N	Y	N	Mississippi River	FEMA	Ecological	Enviromental	Wildfire	November
1434	C28063	Mississippi	MS	28	Jefferson	County	28063	EMC	Y	N	Y	N	Mississippi River	FEMA	Ecological	Enviromental	Wildfire	September
1434	C28063	Mississippi	MS	28	Jefferson	County	28063	EMC	Y	N	Y	N	Mississippi River	FEMA	Ecological	Enviromental	Wildfire	April
1434	C28063	Mississippi	MS	28	Jefferson	County	28063	EMC	Y	N	Y	N	Mississippi River	FEMA	Ecological	Enviromental	Wildfire	October
1147	C22065	Louisiana	LA	22	Madison	Parish	22065	EMC	Y	N	N	N	Mississippi River	FEMA	Metrological	Enviromental	Cold Wave	November
1147	C22065	Louisiana	LA	22	Madison	Parish	22065	EMC	Y	N	N	N	Mississippi River	FEMA	Metrological	Enviromental	Cold Wave	December
1147	C22065	Louisiana	LA	22	Madison	Parish	22065	EMC	Y	N	N	N	Mississippi River	FEMA	Metrological	Enviromental	Cold Wave	January
1147	C22065	Louisiana	LA	22	Madison	Parish	22065	EMC	Y	N	N	N	Mississippi River	FEMA	Metrological	Enviromental	Cold Wave	February
1147	C22065	Louisiana	LA	22	Madison	Parish	22065	EMC	Y	N	N	N	Mississippi River	FEMA	Metrological	Enviromental	Winter Weather	November
1147	C22065	Louisiana	LA	22	Madison	Parish	22065	EMC	Y	N	N	N	Mississippi River	FEMA	Metrological	Enviromental	Winter Weather	December
1147	C22065	Louisiana	LA	22	Madison	Parish	22065	EMC	Y	N	N	N	Mississippi River	FEMA	Metrological	Enviromental	Winter Weather	January
1147	C22065	Louisiana	LA	22	Madison	Parish	22065	EMC	Y	N	N	N	Mississippi River	FEMA	Metrological	Enviromental	Winter Weather	February
1147	C22065	Louisiana	LA	22	Madison	Parish	22065	EMC	Y	N	N	N	Mississippi River	FEMA	Metrological	Enviromental	Winter Weather	March
1147	C22065	Louisiana	LA	22	Madison	Parish	22065	EMC	Y	N	N	N	Mississippi River	FEMA	Metrological	Enviromental	Hurricane	November
1147	C22065	Louisiana	LA	22	Madison	Parish	22065	EMC	Y	N	N	N	Mississippi River	FEMA	Metrological	Enviromental	Hurricane	June
1147	C22065	Louisiana	LA	22	Madison	Parish	22065	EMC	Y	N	N	N	Mississippi River	FEMA	Metrological	Enviromental	Hurricane	July
1147	C22065	Louisiana	LA	22	Madison	Parish	22065	EMC	Y	N	N	N	Mississippi River	FEMA	Metrological	Enviromental	Hurricane	August
1147	C22065	Louisiana	LA	22	Madison	Parish	22065	EMC	Y	N	N	N	Mississippi River	FEMA	Metrological	Enviromental	Hurricane	September
1147	C22065	Louisiana	LA	22	Madison	Parish	22065	EMC	Y	N	N	N	Mississippi River	FEMA	Metrological	Enviromental	Hurricane	October
32	C01063	Alabama	AL	01	Greene	County	01063	DA	Y	N	N	N	Tenn-Tom, Black Warrior-Tombigbee	Lit	Maritime	Equity	Recreational Boating	July
32	C01063	Alabama	AL	01	Greene	County	01063	DA	Y	N	N	N	Tenn-Tom, Black Warrior-Tombigbee	Lit	Maritime	Equity	Recreational Boating	August
32	C01063	Alabama	AL	01	Greene	County	01063	DA	Y	N	N	N	Tenn-Tom, Black Warrior-Tombigbee	Lit	Maritime	Equity	Recreational Boating	September
32	C01063	Alabama	AL	01	Greene	County	01063	DA	Y	N	N	N	Tenn-Tom, Black Warrior-Tombigbee	Lit	Maritime	Equity	Recreational Boating	May
1147	C22065	Louisiana	LA	22	Madison	Parish	22065	EMC	Y	N	N	N	Mississippi River	FEMA	Metrological	Enviromental	Cold Wave	March
1147	C22065	Louisiana	LA	22	Madison	Parish	22065	BC	Y	N	N	N	Mississippi River	Lit	Fluvial	Enviromental	Low Water	November
1147	C22065	Louisiana	LA	22	Madison	Parish	22065	BC	Y	N	N	N	Mississippi River	Lit	Fluvial	Enviromental	Low Water	August
1147	C22065	Louisiana	LA	22	Madison	Parish	22065	BC	Y	N	N	N	Mississippi River	Lit	Fluvial	Enviromental	Low Water	September
1147	C22065	Louisiana	LA	22	Madison	Parish	22065	BC	Y	N	N	N	Mississippi River	Lit	Fluvial	Enviromental	Low Water	October
1147	C22065	Louisiana	LA	22	Madison	Parish	22065	BC	Y	N	N	N	Mississippi River	Lit	Fluvial	Enviromental	High Water	March
1147	C22065	Louisiana	LA	22	Madison	Parish	22065	BC	Y	N	N	N	Mississippi River	Lit	Fluvial	Enviromental	High Water	April
1147	C22065	Louisiana	LA	22	Madison	Parish	22065	BC	Y	N	N	N	Mississippi River	Lit	Fluvial	Enviromental	High Water	May
1147	C22065	Louisiana	LA	22	Madison	Parish	22065	EMC	Y	N	N	N	Mississippi River	FEMA	Non Seasonal	Enviromental	Volcano
1147	C22065	Louisiana	LA	22	Madison	Parish	22065	EMC	Y	N	N	N	Mississippi River	FEMA	Non Seasonal	Enviromental	Earthquake
1147	C22065	Louisiana	LA	22	Madison	Parish	22065	EMC	Y	N	N	N	Mississippi River	FEMA	Geotechnical	Enviromental	Avalanche
1147	C22065	Louisiana	LA	22	Madison	Parish	22065	EMC	Y	N	N	N	Mississippi River	FEMA	Non Seasonal	Enviromental	Tsunami
1147	C22065	Louisiana	LA	22	Madison	Parish	22065	EMC	Y	N	N	N	Mississippi River	FEMA	Metrological	Enviromental	Hail	February
1147	C22065	Louisiana	LA	22	Madison	Parish	22065	EMC	Y	N	N	N	Mississippi River	FEMA	Metrological	Enviromental	Hail	March
1147	C22065	Louisiana	LA	22	Madison	Parish	22065	EMC	Y	N	N	N	Mississippi River	FEMA	Metrological	Enviromental	Hail	April
1147	C22065	Louisiana	LA	22	Madison	Parish	22065	EMC	Y	N	N	N	Mississippi River	FEMA	Metrological	Enviromental	Hail	May
1147	C22065	Louisiana	LA	22	Madison	Parish	22065	EMC	Y	N	N	N	Mississippi River	FEMA	Metrological	Enviromental	Hail	June
1147	C22065	Louisiana	LA	22	Madison	Parish	22065	EMC	Y	N	N	N	Mississippi River	FEMA	Ecological	Enviromental	Wildfire	December
1147	C22065	Louisiana	LA	22	Madison	Parish	22065	EMC	Y	N	N	N	Mississippi River	FEMA	Ecological	Enviromental	Wildfire	February
1147	C22065	Louisiana	LA	22	Madison	Parish	22065	EMC	Y	N	N	N	Mississippi River	FEMA	Ecological	Enviromental	Wildfire	January
1147	C22065	Louisiana	LA	22	Madison	Parish	22065	EMC	Y	N	N	N	Mississippi River	FEMA	Ecological	Enviromental	Wildfire	March
1147	C22065	Louisiana	LA	22	Madison	Parish	22065	EMC	Y	N	N	N	Mississippi River	FEMA	Ecological	Enviromental	Wildfire	November
1147	C22065	Louisiana	LA	22	Madison	Parish	22065	EMC	Y	N	N	N	Mississippi River	FEMA	Ecological	Enviromental	Wildfire	September
1147	C22065	Louisiana	LA	22	Madison	Parish	22065	EMC	Y	N	N	N	Mississippi River	FEMA	Ecological	Enviromental	Wildfire	April
1147	C22065	Louisiana	LA	22	Madison	Parish	22065	EMC	Y	N	N	N	Mississippi River	FEMA	Ecological	Enviromental	Wildfire	October
1153	C22077	Louisiana	LA	22	Pointe Coupee	Parish	22077	EMC	Y	N	N	Y	Mississippi River	FEMA	Metrological	Enviromental	Cold Wave	November
1153	C22077	Louisiana	LA	22	Pointe Coupee	Parish	22077	EMC	Y	N	N	Y	Mississippi River	FEMA	Metrological	Enviromental	Cold Wave	December
1153	C22077	Louisiana	LA	22	Pointe Coupee	Parish	22077	EMC	Y	N	N	Y	Mississippi River	FEMA	Metrological	Enviromental	Cold Wave	January
1153	C22077	Louisiana	LA	22	Pointe Coupee	Parish	22077	EMC	Y	N	N	Y	Mississippi River	FEMA	Metrological	Enviromental	Cold Wave	February
1153	C22077	Louisiana	LA	22	Pointe Coupee	Parish	22077	EMC	Y	N	N	Y	Mississippi River	FEMA	Metrological	Enviromental	Winter Weather	November
1153	C22077	Louisiana	LA	22	Pointe Coupee	Parish	22077	EMC	Y	N	N	Y	Mississippi River	FEMA	Metrological	Enviromental	Winter Weather	December
1153	C22077	Louisiana	LA	22	Pointe Coupee	Parish	22077	EMC	Y	N	N	Y	Mississippi River	FEMA	Metrological	Enviromental	Winter Weather	January
1153	C22077	Louisiana	LA	22	Pointe Coupee	Parish	22077	EMC	Y	N	N	Y	Mississippi River	FEMA	Metrological	Enviromental	Winter Weather	February
1153	C22077	Louisiana	LA	22	Pointe Coupee	Parish	22077	EMC	Y	N	N	Y	Mississippi River	FEMA	Metrological	Enviromental	Winter Weather	March
1153	C22077	Louisiana	LA	22	Pointe Coupee	Parish	22077	EMC	Y	N	N	Y	Mississippi River	FEMA	Metrological	Enviromental	Hurricane	November
1153	C22077	Louisiana	LA	22	Pointe Coupee	Parish	22077	EMC	Y	N	N	Y	Mississippi River	FEMA	Metrological	Enviromental	Hurricane	June
1153	C22077	Louisiana	LA	22	Pointe Coupee	Parish	22077	EMC	Y	N	N	Y	Mississippi River	FEMA	Metrological	Enviromental	Hurricane	July
1153	C22077	Louisiana	LA	22	Pointe Coupee	Parish	22077	EMC	Y	N	N	Y	Mississippi River	FEMA	Metrological	Enviromental	Hurricane	August
1153	C22077	Louisiana	LA	22	Pointe Coupee	Parish	22077	EMC	Y	N	N	Y	Mississippi River	FEMA	Metrological	Enviromental	Hurricane	September
1153	C22077	Louisiana	LA	22	Pointe Coupee	Parish	22077	EMC	Y	N	N	Y	Mississippi River	FEMA	Metrological	Enviromental	Hurricane	October
33	C01065	Alabama	AL	01	Hale	County	01065	EMC	Y	N	N	N	Black Warrior-Tombigbee	Lit	Metrological	Enviromental	Heat Wave	June
33	C01065	Alabama	AL	01	Hale	County	01065	EMC	Y	N	N	N	Black Warrior-Tombigbee	FEMA	Metrological	Enviromental	Heat Wave	July
33	C01065	Alabama	AL	01	Hale	County	01065	EMC	Y	N	N	N	Black Warrior-Tombigbee	FEMA	Metrological	Enviromental	Heat Wave	August
33	C01065	Alabama	AL	01	Hale	County	01065	EMC	Y	N	N	N	Black Warrior-Tombigbee	FEMA	Metrological	Enviromental	Heat Wave	September
1153	C22077	Louisiana	LA	22	Pointe Coupee	Parish	22077	DA	Y	N	N	Y	Mississippi River	Lit	Cultural	Equity	Mardi Gras	February
1153	C22077	Louisiana	LA	22	Pointe Coupee	Parish	22077	EMC	Y	N	N	Y	Mississippi River	FEMA	Metrological	Enviromental	Cold Wave	March
1153	C22077	Louisiana	LA	22	Pointe Coupee	Parish	22077	BC	Y	N	N	Y	Mississippi River	Lit	Fluvial	Enviromental	Low Water	November
1153	C22077	Louisiana	LA	22	Pointe Coupee	Parish	22077	BC	Y	N	N	Y	Mississippi River	Lit	Fluvial	Enviromental	Low Water	August
1153	C22077	Louisiana	LA	22	Pointe Coupee	Parish	22077	BC	Y	N	N	Y	Mississippi River	Lit	Fluvial	Enviromental	Low Water	September
1153	C22077	Louisiana	LA	22	Pointe Coupee	Parish	22077	BC	Y	N	N	Y	Mississippi River	Lit	Fluvial	Enviromental	Low Water	October
1153	C22077	Louisiana	LA	22	Pointe Coupee	Parish	22077	BC	Y	N	N	Y	Mississippi River	Lit	Fluvial	Enviromental	High Water	March
1153	C22077	Louisiana	LA	22	Pointe Coupee	Parish	22077	BC	Y	N	N	Y	Mississippi River	Lit	Fluvial	Enviromental	High Water	April
1153	C22077	Louisiana	LA	22	Pointe Coupee	Parish	22077	BC	Y	N	N	Y	Mississippi River	Lit	Fluvial	Enviromental	High Water	May
1153	C22077	Louisiana	LA	22	Pointe Coupee	Parish	22077	EMC	Y	N	N	Y	Mississippi River	FEMA	Non Seasonal	Enviromental	Volcano
1153	C22077	Louisiana	LA	22	Pointe Coupee	Parish	22077	EMC	Y	N	N	Y	Mississippi River	FEMA	Non Seasonal	Enviromental	Earthquake
1153	C22077	Louisiana	LA	22	Pointe Coupee	Parish	22077	EMC	Y	N	N	Y	Mississippi River	FEMA	Geotechnical	Enviromental	Avalanche
1153	C22077	Louisiana	LA	22	Pointe Coupee	Parish	22077	EMC	Y	N	N	Y	Mississippi River	FEMA	Non Seasonal	Enviromental	Tsunami
1153	C22077	Louisiana	LA	22	Pointe Coupee	Parish	22077	EMC	Y	N	N	Y	Mississippi River	FEMA	Metrological	Enviromental	Hail	February
1153	C22077	Louisiana	LA	22	Pointe Coupee	Parish	22077	EMC	Y	N	N	Y	Mississippi River	FEMA	Metrological	Enviromental	Hail	March
1153	C22077	Louisiana	LA	22	Pointe Coupee	Parish	22077	EMC	Y	N	N	Y	Mississippi River	FEMA	Metrological	Enviromental	Hail	April
1153	C22077	Louisiana	LA	22	Pointe Coupee	Parish	22077	EMC	Y	N	N	Y	Mississippi River	FEMA	Metrological	Enviromental	Hail	May
1153	C22077	Louisiana	LA	22	Pointe Coupee	Parish	22077	EMC	Y	N	N	Y	Mississippi River	FEMA	Metrological	Enviromental	Hail	June
1153	C22077	Louisiana	LA	22	Pointe Coupee	Parish	22077	EMC	Y	N	N	Y	Mississippi River	FEMA	Ecological	Enviromental	Wildfire	December
1153	C22077	Louisiana	LA	22	Pointe Coupee	Parish	22077	EMC	Y	N	N	Y	Mississippi River	FEMA	Ecological	Enviromental	Wildfire	February
1153	C22077	Louisiana	LA	22	Pointe Coupee	Parish	22077	EMC	Y	N	N	Y	Mississippi River	FEMA	Ecological	Enviromental	Wildfire	January
1153	C22077	Louisiana	LA	22	Pointe Coupee	Parish	22077	EMC	Y	N	N	Y	Mississippi River	FEMA	Ecological	Enviromental	Wildfire	March
1153	C22077	Louisiana	LA	22	Pointe Coupee	Parish	22077	EMC	Y	N	N	Y	Mississippi River	FEMA	Ecological	Enviromental	Wildfire	November
1153	C22077	Louisiana	LA	22	Pointe Coupee	Parish	22077	EMC	Y	N	N	Y	Mississippi River	FEMA	Ecological	Enviromental	Wildfire	September
1153	C22077	Louisiana	LA	22	Pointe Coupee	Parish	22077	EMC	Y	N	N	Y	Mississippi River	FEMA	Ecological	Enviromental	Wildfire	April
1153	C22077	Louisiana	LA	22	Pointe Coupee	Parish	22077	EMC	Y	N	N	Y	Mississippi River	FEMA	Ecological	Enviromental	Wildfire	October
1158	C22087	Louisiana	LA	22	St. Bernard	Parish	22087	EMC	Y	Y	Y	N	Mississippi River	FEMA	Metrological	Enviromental	Cold Wave	November
1158	C22087	Louisiana	LA	22	St. Bernard	Parish	22087	EMC	Y	Y	Y	N	Mississippi River	FEMA	Metrological	Enviromental	Cold Wave	December
1158	C22087	Louisiana	LA	22	St. Bernard	Parish	22087	EMC	Y	Y	Y	N	Mississippi River	FEMA	Metrological	Enviromental	Cold Wave	January
1158	C22087	Louisiana	LA	22	St. Bernard	Parish	22087	EMC	Y	Y	Y	N	Mississippi River	FEMA	Metrological	Enviromental	Cold Wave	February
1158	C22087	Louisiana	LA	22	St. Bernard	Parish	22087	EMC	Y	Y	Y	N	Mississippi River	FEMA	Metrological	Enviromental	Winter Weather	November
1158	C22087	Louisiana	LA	22	St. Bernard	Parish	22087	EMC	Y	Y	Y	N	Mississippi River	FEMA	Metrological	Enviromental	Winter Weather	December
1158	C22087	Louisiana	LA	22	St. Bernard	Parish	22087	EMC	Y	Y	Y	N	Mississippi River	FEMA	Metrological	Enviromental	Winter Weather	January
1158	C22087	Louisiana	LA	22	St. Bernard	Parish	22087	EMC	Y	Y	Y	N	Mississippi River	FEMA	Metrological	Enviromental	Winter Weather	February
1158	C22087	Louisiana	LA	22	St. Bernard	Parish	22087	EMC	Y	Y	Y	N	Mississippi River	FEMA	Metrological	Enviromental	Winter Weather	March
1158	C22087	Louisiana	LA	22	St. Bernard	Parish	22087	EMC	Y	Y	Y	N	Mississippi River	FEMA	Metrological	Enviromental	Hurricane	November
1158	C22087	Louisiana	LA	22	St. Bernard	Parish	22087	EMC	Y	Y	Y	N	Mississippi River	FEMA	Metrological	Enviromental	Hurricane	June
1158	C22087	Louisiana	LA	22	St. Bernard	Parish	22087	EMC	Y	Y	Y	N	Mississippi River	FEMA	Metrological	Enviromental	Hurricane	July
1158	C22087	Louisiana	LA	22	St. Bernard	Parish	22087	EMC	Y	Y	Y	N	Mississippi River	FEMA	Metrological	Enviromental	Hurricane	August
1158	C22087	Louisiana	LA	22	St. Bernard	Parish	22087	EMC	Y	Y	Y	N	Mississippi River	FEMA	Metrological	Enviromental	Hurricane	September
1158	C22087	Louisiana	LA	22	St. Bernard	Parish	22087	EMC	Y	Y	Y	N	Mississippi River	FEMA	Metrological	Enviromental	Hurricane	October
1158	C22087	Louisiana	LA	22	St. Bernard	Parish	22087	BC	Y	Y	Y	N	Mississippi River	Lit	Ecological	Enviromental	Termite Swarm	May	localized heavy swarms at night
1158	C22087	Louisiana	LA	22	St. Bernard	Parish	22087	DA	Y	Y	Y	N	Mississippi River	Lit	Metrological	Enviromental	Marine Fog	November
1158	C22087	Louisiana	LA	22	St. Bernard	Parish	22087	DA	Y	Y	Y	N	Mississippi River	Lit	Metrological	Enviromental	Marine Fog	January
1158	C22087	Louisiana	LA	22	St. Bernard	Parish	22087	DA	Y	Y	Y	N	Mississippi River	Lit	Metrological	Enviromental	Marine Fog	February
1158	C22087	Louisiana	LA	22	St. Bernard	Parish	22087	DA	Y	Y	Y	N	Mississippi River	Lit	Metrological	Enviromental	Marine Fog	March
1158	C22087	Louisiana	LA	22	St. Bernard	Parish	22087	DA	Y	Y	Y	N	Mississippi River	Lit	Metrological	Enviromental	Marine Fog	October
1158	C22087	Louisiana	LA	22	St. Bernard	Parish	22087	DA	Y	Y	Y	N	Mississippi River	Lit	Metrological	Enviromental	Marine Fog	December
33	C01065	Alabama	AL	01	Hale	County	01065	DA	Y	N	N	N	Black Warrior-Tombigbee	Lit	Maritime	Equity	Recreational Boating	June
33	C01065	Alabama	AL	01	Hale	County	01065	DA	Y	N	N	N	Black Warrior-Tombigbee	Lit	Maritime	Equity	Recreational Boating	July
33	C01065	Alabama	AL	01	Hale	County	01065	DA	Y	N	N	N	Black Warrior-Tombigbee	Lit	Maritime	Equity	Recreational Boating	August
33	C01065	Alabama	AL	01	Hale	County	01065	DA	Y	N	N	N	Black Warrior-Tombigbee	Lit	Maritime	Equity	Recreational Boating	September
1158	C22087	Louisiana	LA	22	St. Bernard	Parish	22087	DA	Y	Y	Y	N	Mississippi River	Lit	Cultural	Equity	Mardi Gras	February	River works, but business closures
1158	C22087	Louisiana	LA	22	St. Bernard	Parish	22087	BC	Y	Y	Y	N	Mississippi River	Lit	Maritime	Equity	Ferry	January	Algiers-Chalmette Ferry
1158	C22087	Louisiana	LA	22	St. Bernard	Parish	22087	BC	Y	Y	Y	N	Mississippi River	Lit	Maritime	Equity	Ferry	February	Algiers-Chalmette Ferry
1158	C22087	Louisiana	LA	22	St. Bernard	Parish	22087	BC	Y	Y	Y	N	Mississippi River	Lit	Maritime	Equity	Ferry	March	Algiers-Chalmette Ferry
1158	C22087	Louisiana	LA	22	St. Bernard	Parish	22087	BC	Y	Y	Y	N	Mississippi River	Lit	Maritime	Equity	Ferry	June	Algiers-Chalmette Ferry
1158	C22087	Louisiana	LA	22	St. Bernard	Parish	22087	BC	Y	Y	Y	N	Mississippi River	Lit	Maritime	Equity	Ferry	July	Algiers-Chalmette Ferry
1158	C22087	Louisiana	LA	22	St. Bernard	Parish	22087	BC	Y	Y	Y	N	Mississippi River	Lit	Maritime	Equity	Ferry	August	Algiers-Chalmette Ferry
1158	C22087	Louisiana	LA	22	St. Bernard	Parish	22087	BC	Y	Y	Y	N	Mississippi River	Lit	Maritime	Equity	Ferry	September	Algiers-Chalmette Ferry
1158	C22087	Louisiana	LA	22	St. Bernard	Parish	22087	BC	Y	Y	Y	N	Mississippi River	Lit	Maritime	Equity	Ferry	October	Algiers-Chalmette Ferry
1158	C22087	Louisiana	LA	22	St. Bernard	Parish	22087	BC	Y	Y	Y	N	Mississippi River	Lit	Maritime	Equity	Ferry	November	Algiers-Chalmette Ferry
1158	C22087	Louisiana	LA	22	St. Bernard	Parish	22087	BC	Y	Y	Y	N	Mississippi River	Lit	Maritime	Equity	Ferry	December	Algiers-Chalmette Ferry
1158	C22087	Louisiana	LA	22	St. Bernard	Parish	22087	EMC	Y	Y	Y	N	Mississippi River	FEMA	Metrological	Enviromental	Cold Wave	March
1158	C22087	Louisiana	LA	22	St. Bernard	Parish	22087	BC	Y	Y	Y	N	Mississippi River	Lit	Fluvial	Enviromental	Low Water	November
1158	C22087	Louisiana	LA	22	St. Bernard	Parish	22087	BC	Y	Y	Y	N	Mississippi River	Lit	Fluvial	Enviromental	Low Water	August
1158	C22087	Louisiana	LA	22	St. Bernard	Parish	22087	BC	Y	Y	Y	N	Mississippi River	Lit	Fluvial	Enviromental	Low Water	September
1158	C22087	Louisiana	LA	22	St. Bernard	Parish	22087	BC	Y	Y	Y	N	Mississippi River	Lit	Fluvial	Enviromental	Low Water	October
1158	C22087	Louisiana	LA	22	St. Bernard	Parish	22087	BC	Y	Y	Y	N	Mississippi River	Lit	Fluvial	Enviromental	High Water	March
1158	C22087	Louisiana	LA	22	St. Bernard	Parish	22087	BC	Y	Y	Y	N	Mississippi River	Lit	Fluvial	Enviromental	High Water	April
1158	C22087	Louisiana	LA	22	St. Bernard	Parish	22087	BC	Y	Y	Y	N	Mississippi River	Lit	Fluvial	Enviromental	High Water	May
1158	C22087	Louisiana	LA	22	St. Bernard	Parish	22087	EMC	Y	Y	Y	N	Mississippi River	FEMA	Non Seasonal	Enviromental	Volcano
1158	C22087	Louisiana	LA	22	St. Bernard	Parish	22087	EMC	Y	Y	Y	N	Mississippi River	FEMA	Non Seasonal	Enviromental	Earthquake
1158	C22087	Louisiana	LA	22	St. Bernard	Parish	22087	EMC	Y	Y	Y	N	Mississippi River	FEMA	Geotechnical	Enviromental	Avalanche
1158	C22087	Louisiana	LA	22	St. Bernard	Parish	22087	EMC	Y	Y	Y	N	Mississippi River	FEMA	Non Seasonal	Enviromental	Tsunami
1158	C22087	Louisiana	LA	22	St. Bernard	Parish	22087	BC	Y	Y	Y	N	Mississippi River	Lit	Maritime	Economic	Grain Exports	November	Grain Exports
[truncated: 11,842 more rows]

## Sheet: Regional SEM -Operations
Seasonal Event Matrix - Operational Categories									Key=Port/Waterway Closure
Bruce Lambert and Jim Merten, PhD Candidates, Universtity of Antwerp									7	No closue
bruce.lambert@student.uantwerp.be, james.merten@student.uantwerpen.be									8	Parital Closure=Landside/Waterside
									188	Full Closure
There is no probability assigned to the event occurring within a single month.									4	Event Occurs in Category
Events listed here meet one of three conditions - the event peaks during this time of year or occurs during this time of year.
Non-Seasonal - Elements that should be noted as important, but have no seasonal element that can influnce its predictabilty
Criteria	Pull Down Menu	Definiation
Source-	(All)	Filter by FEMA National Registry or Literature Review
State Name Abbreviation	(All)	State - 2 Letter Abbreviation
County Name	(All)	County or Parish Name
Navigation	(All)	Does the County or Parish have navigation facilities accruing the USACE Master Port Database (Y/N)
Coastal	(All)	Is the County or Parish in the specific state's coastal zone (Y/N)
Deep Draft	(All)	Does the County or Parish capable of receiving deep draft navigation vessels (Y/N)
Lock/Dam	(All)	Does the County or Parish have a lock or dam (Y/N)
River	(All)	Listing of Channels or Waterways within or that bound a County or Parish
Event Occurance
	January	February	March	April	May	June	July	August	September	October	November	December	Non Seasonal
Cultural	1	35					1					4
Christmas Bonfires												2
Fireworks							1					1
Mardi Gras		34
Unauthorized fires	1	1										1
Ecological	213	213	213	213	38	12	12	12	225	225	213	213	1
FSMC (Moth)					12	12	12	12	12	12
Termite Swarm					26
Wildfire	213	213	213	213					213	213	213	213
Endangered Species													1
Fluvial			34	34	34	25	25	69	69	59	34		70
Coastal Flooding/Storm Surge						25	25	25	25	25
High Water			34	34	34
Lock Inspections								10	10
Low Water								34	34	34	34
Riverine Flooding													69
Lock and Dam Repairs													1
Geotechnical													426
Avalanche													213
Landslide													213
Maritime	26	25	18	19	121	121	122	122	122	27	24	24	2
Dinner Cruises	1	1	1	1	1	1	1	1	1	1	1	1
Ferry	7	7	8	8	8	8	8	8	8	8	7	7
Grain Exports	7	7								7	7	7
Inbound Containers								1	1	1
Military Cargo													1
River Cruises	9	8	8	8	8	8	8	8	8	8	8	7
Salt Water Barrier Install							1
Vessel Cruises	1	1	1	2	2	2	2	2	2	2	1	1
Recreational Boating					102	102	102	102	102
Commerical Fishing													1
Mobile Exports	1	1										1
Metrological	659	872	1298	852	852	1278	639	639	639	233	872	659
Cold Wave	213	213	213								213	213
Hail		213	213	213	213	213
Heat Wave						213	213	213	213
Hurricane						213	213	213	213	213	213
Ice Storm	213	213	213								213	213
Lightning				213	213	213	213	213	213
Marine Fog	20	20	20							20	20	20
Strong Winds, Thunderstorms			213	213	213	213
Tornado			213	213	213	213
Winter Weather	213	213	213								213	213
Non Seasonal													852
Drought													213
Earthquake													213
Tsunami													213
Volcano													213

## Sheet: Regional SEM -Events
Seasonal Event Matrix - Event Categories
Bruce Lambert and Jim Merten, PhD Candidates, Universtity of Antwerp
bruce.lambert@student.uantwerp.be, james.merten@student.uantwerpen.be
There is no probability assigned to the event occurring within a single month.
Events listed here meet one of three conditions - the event peaks during this time of year or occurs during this time of year.
Non-Seasonal - Elements that should be noted as important, but have no seasonal element that can influnce its predictabilty
Criteria	Pull Down Menu	Definiation
		Filter by FEMA National Registry or Literature Review
Source-	(All)	State - 2 Letter Abbreviation
State Name Abbreviation	(All)	County or Parish Name
Navigation	(All)	Does the County or Parish have navigation facilities accruing the USACE Master Port Database (Y/N)
Coastal	(All)	Is the County or Parish in the specific state's coastal zone (Y/N)
Deep Draft	(All)	Does the County or Parish capable of receiving deep draft navigation vessels (Y/N)
Lock/Dam	(All)	Does the County or Parish have a lock or dam (Y/N)
River	(All)	Listing of Channels or Waterways within or that bound a County or Parish
Event Occurance
	January	February	March	April	May	June	July	August	September	October	November	December	Non Seasonal
Cultural	1	35					1					4
Christmas Bonfires												2
Louisiana												2
St. James												1
St. John the Baptist												1
Fireworks							1					1
Louisiana							1					1
Orleans							1					1
Mardi Gras		34
Alabama		2
Baldwin		1
Mobile		1
Louisiana		29
Acadia		1
Ascension		1
Assumption		1
Avoyelles		1
Calcasieu		1
Cameron		1
East Baton Rouge		1
Iberia		1
Iberville		1
Jefferson		1
Jefferson Davis		1
Lafayette		1
Lafourche		1
Livingston		1
Orleans		1
Plaquemines		1
Pointe Coupee		1
St. Bernard		1
St. Charles		1
St. James		1
St. John the Baptist		1
St. Landry		1
St. Martin		1
St. Mary		1
St. Tammany		1
Tangipahoa		1
Terrebonne		1
Vermilion		1
West Baton Rouge		1
Mississippi		3
Hancock		1
Harrison		1
Jackson		1
Unauthorized fires	1	1										1
Louisiana	1	1										1
Orleans	1	1										1
Ecological	213	213	213	213	38	12	12	12	225	225	213	213	1
FSMC (Moth)					12	12	12	12	12	12
Alabama					1	1	1	1	1	1
Mobile					1	1	1	1	1	1
Louisiana					9	9	9	9	9	9
Ascension					1	1	1	1	1	1
Calcasieu					1	1	1	1	1	1
Jefferson					1	1	1	1	1	1
Orleans					1	1	1	1	1	1
Plaquemines					1	1	1	1	1	1
St. Bernard					1	1	1	1	1	1
St. Charles					1	1	1	1	1	1
St. James					1	1	1	1	1	1
St. John the Baptist					1	1	1	1	1	1
Mississippi					2	2	2	2	2	2
Harrison					1	1	1	1	1	1
Jackson					1	1	1	1	1	1
Termite Swarm					26
Alabama					2
Baldwin					1
Mobile					1
Louisiana					20
Ascension					1
Assumption					1
Calcasieu					1
Cameron					1
Iberia					1
Jefferson					1
Lafourche					1
Livingston					1
Orleans					1
Plaquemines					1
St. Bernard					1
St. Charles					1
St. James					1
St. John the Baptist					1
St. Martin					1
St. Mary					1
St. Tammany					1
Tangipahoa					1
Terrebonne					1
Vermilion					1
Mississippi					4
Hancock					1
Harrison					1
Jackson					1
Jefferson					1
Wildfire	213	213	213	213					213	213	213	213
Alabama	67	67	67	67					67	67	67	67
Autauga	1	1	1	1					1	1	1	1
Baldwin	1	1	1	1					1	1	1	1
Barbour	1	1	1	1					1	1	1	1
Bibb	1	1	1	1					1	1	1	1
Blount	1	1	1	1					1	1	1	1
Bullock	1	1	1	1					1	1	1	1
Butler	1	1	1	1					1	1	1	1
Calhoun	1	1	1	1					1	1	1	1
Chambers	1	1	1	1					1	1	1	1
Cherokee	1	1	1	1					1	1	1	1
Chilton	1	1	1	1					1	1	1	1
Choctaw	1	1	1	1					1	1	1	1
Clarke	1	1	1	1					1	1	1	1
Clay	1	1	1	1					1	1	1	1
Cleburne	1	1	1	1					1	1	1	1
Coffee	1	1	1	1					1	1	1	1
Colbert	1	1	1	1					1	1	1	1
Conecuh	1	1	1	1					1	1	1	1
Coosa	1	1	1	1					1	1	1	1
Covington	1	1	1	1					1	1	1	1
Crenshaw	1	1	1	1					1	1	1	1
Cullman	1	1	1	1					1	1	1	1
Dale	1	1	1	1					1	1	1	1
Dallas	1	1	1	1					1	1	1	1
DeKalb	1	1	1	1					1	1	1	1
Elmore	1	1	1	1					1	1	1	1
Escambia	1	1	1	1					1	1	1	1
Etowah	1	1	1	1					1	1	1	1
Fayette	1	1	1	1					1	1	1	1
Franklin	1	1	1	1					1	1	1	1
Geneva	1	1	1	1					1	1	1	1
Greene	1	1	1	1					1	1	1	1
Hale	1	1	1	1					1	1	1	1
Henry	1	1	1	1					1	1	1	1
Houston	1	1	1	1					1	1	1	1
Jackson	1	1	1	1					1	1	1	1
Jefferson	1	1	1	1					1	1	1	1
Lamar	1	1	1	1					1	1	1	1
Lauderdale	1	1	1	1					1	1	1	1
Lawrence	1	1	1	1					1	1	1	1
Lee	1	1	1	1					1	1	1	1
Limestone	1	1	1	1					1	1	1	1
Lowndes	1	1	1	1					1	1	1	1
Macon	1	1	1	1					1	1	1	1
Madison	1	1	1	1					1	1	1	1
Marengo	1	1	1	1					1	1	1	1
Marion	1	1	1	1					1	1	1	1
Marshall	1	1	1	1					1	1	1	1
Mobile	1	1	1	1					1	1	1	1
Monroe	1	1	1	1					1	1	1	1
Montgomery	1	1	1	1					1	1	1	1
Morgan	1	1	1	1					1	1	1	1
Perry	1	1	1	1					1	1	1	1
Pickens	1	1	1	1					1	1	1	1
Pike	1	1	1	1					1	1	1	1
Randolph	1	1	1	1					1	1	1	1
Russell	1	1	1	1					1	1	1	1
Shelby	1	1	1	1					1	1	1	1
St. Clair	1	1	1	1					1	1	1	1
Sumter	1	1	1	1					1	1	1	1
Talladega	1	1	1	1					1	1	1	1
Tallapoosa	1	1	1	1					1	1	1	1
Tuscaloosa	1	1	1	1					1	1	1	1
Walker	1	1	1	1					1	1	1	1
Washington	1	1	1	1					1	1	1	1
Wilcox	1	1	1	1					1	1	1	1
Winston	1	1	1	1					1	1	1	1
Louisiana	64	64	64	64					64	64	64	64
Acadia	1	1	1	1					1	1	1	1
Allen	1	1	1	1					1	1	1	1
Ascension	1	1	1	1					1	1	1	1
Assumption	1	1	1	1					1	1	1	1
Avoyelles	1	1	1	1					1	1	1	1
Beauregard	1	1	1	1					1	1	1	1
Bienville	1	1	1	1					1	1	1	1
Bossier	1	1	1	1					1	1	1	1
Caddo	1	1	1	1					1	1	1	1
Calcasieu	1	1	1	1					1	1	1	1
Caldwell	1	1	1	1					1	1	1	1
Cameron	1	1	1	1					1	1	1	1
Catahoula	1	1	1	1					1	1	1	1
Claiborne	1	1	1	1					1	1	1	1
Concordia	1	1	1	1					1	1	1	1
De Soto	1	1	1	1					1	1	1	1
East Baton Rouge	1	1	1	1					1	1	1	1
East Carroll	1	1	1	1					1	1	1	1
East Feliciana	1	1	1	1					1	1	1	1
Evangeline	1	1	1	1					1	1	1	1
Franklin	1	1	1	1					1	1	1	1
Grant	1	1	1	1					1	1	1	1
Iberia	1	1	1	1					1	1	1	1
Iberville	1	1	1	1					1	1	1	1
Jackson	1	1	1	1					1	1	1	1
Jefferson	1	1	1	1					1	1	1	1
Jefferson Davis	1	1	1	1					1	1	1	1
Lafayette	1	1	1	1					1	1	1	1
Lafourche	1	1	1	1					1	1	1	1
LaSalle	1	1	1	1					1	1	1	1
Lincoln	1	1	1	1					1	1	1	1
Livingston	1	1	1	1					1	1	1	1
Madison	1	1	1	1					1	1	1	1
Morehouse	1	1	1	1					1	1	1	1
Natchitoches	1	1	1	1					1	1	1	1
Orleans	1	1	1	1					1	1	1	1
Ouachita	1	1	1	1					1	1	1	1
Plaquemines	1	1	1	1					1	1	1	1
Pointe Coupee	1	1	1	1					1	1	1	1
Rapides	1	1	1	1					1	1	1	1
Red River	1	1	1	1					1	1	1	1
Richland	1	1	1	1					1	1	1	1
Sabine	1	1	1	1					1	1	1	1
St. Bernard	1	1	1	1					1	1	1	1
St. Charles	1	1	1	1					1	1	1	1
St. Helena	1	1	1	1					1	1	1	1
St. James	1	1	1	1					1	1	1	1
St. John the Baptist	1	1	1	1					1	1	1	1
St. Landry	1	1	1	1					1	1	1	1
St. Martin	1	1	1	1					1	1	1	1
St. Mary	1	1	1	1					1	1	1	1
St. Tammany	1	1	1	1					1	1	1	1
Tangipahoa	1	1	1	1					1	1	1	1
Tensas	1	1	1	1					1	1	1	1
Terrebonne	1	1	1	1					1	1	1	1
Union	1	1	1	1					1	1	1	1
Vermilion	1	1	1	1					1	1	1	1
Vernon	1	1	1	1					1	1	1	1
Washington	1	1	1	1					1	1	1	1
Webster	1	1	1	1					1	1	1	1
West Baton Rouge	1	1	1	1					1	1	1	1
West Carroll	1	1	1	1					1	1	1	1
West Feliciana	1	1	1	1					1	1	1	1
Winn	1	1	1	1					1	1	1	1
Mississippi	82	82	82	82					82	82	82	82
Adams	1	1	1	1					1	1	1	1
Alcorn	1	1	1	1					1	1	1	1
Amite	1	1	1	1					1	1	1	1
Attala	1	1	1	1					1	1	1	1
Benton	1	1	1	1					1	1	1	1
Bolivar	1	1	1	1					1	1	1	1
Calhoun	1	1	1	1					1	1	1	1
Carroll	1	1	1	1					1	1	1	1
Chickasaw	1	1	1	1					1	1	1	1
Choctaw	1	1	1	1					1	1	1	1
Claiborne	1	1	1	1					1	1	1	1
Clarke	1	1	1	1					1	1	1	1
Clay	1	1	1	1					1	1	1	1
Coahoma	1	1	1	1					1	1	1	1
Copiah	1	1	1	1					1	1	1	1
Covington	1	1	1	1					1	1	1	1
DeSoto	1	1	1	1					1	1	1	1
Forrest	1	1	1	1					1	1	1	1
Franklin	1	1	1	1					1	1	1	1
George	1	1	1	1					1	1	1	1
Greene	1	1	1	1					1	1	1	1
Grenada	1	1	1	1					1	1	1	1
Hancock	1	1	1	1					1	1	1	1
Harrison	1	1	1	1					1	1	1	1
Hinds	1	1	1	1					1	1	1	1
Holmes	1	1	1	1					1	1	1	1
Humphreys	1	1	1	1					1	1	1	1
Issaquena	1	1	1	1					1	1	1	1
Itawamba	1	1	1	1					1	1	1	1
Jackson	1	1	1	1					1	1	1	1
Jasper	1	1	1	1					1	1	1	1
Jefferson	1	1	1	1					1	1	1	1
Jefferson Davis	1	1	1	1					1	1	1	1
Jones	1	1	1	1					1	1	1	1
Kemper	1	1	1	1					1	1	1	1
Lafayette	1	1	1	1					1	1	1	1
Lamar	1	1	1	1					1	1	1	1
Lauderdale	1	1	1	1					1	1	1	1
Lawrence	1	1	1	1					1	1	1	1
Leake	1	1	1	1					1	1	1	1
Lee	1	1	1	1					1	1	1	1
Leflore	1	1	1	1					1	1	1	1
Lincoln	1	1	1	1					1	1	1	1
Lowndes	1	1	1	1					1	1	1	1
Madison	1	1	1	1					1	1	1	1
Marion	1	1	1	1					1	1	1	1
Marshall	1	1	1	1					1	1	1	1
Monroe	1	1	1	1					1	1	1	1
Montgomery	1	1	1	1					1	1	1	1
Neshoba	1	1	1	1					1	1	1	1
Newton	1	1	1	1					1	1	1	1
Noxubee	1	1	1	1					1	1	1	1
Oktibbeha	1	1	1	1					1	1	1	1
Panola	1	1	1	1					1	1	1	1
Pearl River	1	1	1	1					1	1	1	1
Perry	1	1	1	1					1	1	1	1
Pike	1	1	1	1					1	1	1	1
Pontotoc	1	1	1	1					1	1	1	1
Prentiss	1	1	1	1					1	1	1	1
Quitman	1	1	1	1					1	1	1	1
Rankin	1	1	1	1					1	1	1	1
Scott	1	1	1	1					1	1	1	1
Sharkey	1	1	1	1					1	1	1	1
Simpson	1	1	1	1					1	1	1	1
Smith	1	1	1	1					1	1	1	1
Stone	1	1	1	1					1	1	1	1
Sunflower	1	1	1	1					1	1	1	1
Tallahatchie	1	1	1	1					1	1	1	1
Tate	1	1	1	1					1	1	1	1
Tippah	1	1	1	1					1	1	1	1
Tishomingo	1	1	1	1					1	1	1	1
Tunica	1	1	1	1					1	1	1	1
Union	1	1	1	1					1	1	1	1
Walthall	1	1	1	1					1	1	1	1
Warren	1	1	1	1					1	1	1	1
Washington	1	1	1	1					1	1	1	1
Wayne	1	1	1	1					1	1	1	1
Webster	1	1	1	1					1	1	1	1
Wilkinson	1	1	1	1					1	1	1	1
Winston	1	1	1	1					1	1	1	1
Yalobusha	1	1	1	1					1	1	1	1
Yazoo	1	1	1	1					1	1	1	1
Endangered Species													1
Alabama													1
Mobile													1
Fluvial			34	34	34	25	25	69	69	59	34		70
Coastal Flooding/Storm Surge						25	25	25	25	25
Alabama						2	2	2	2	2
Baldwin						1	1	1	1	1
Mobile						1	1	1	1	1
Louisiana						20	20	20	20	20
Ascension						1	1	1	1	1
Assumption						1	1	1	1	1
Calcasieu						1	1	1	1	1
Cameron						1	1	1	1	1
Iberia						1	1	1	1	1
Jefferson						1	1	1	1	1
Lafourche						1	1	1	1	1
Livingston						1	1	1	1	1
Orleans						1	1	1	1	1
Plaquemines						1	1	1	1	1
St. Bernard						1	1	1	1	1
St. Charles						1	1	1	1	1
St. James						1	1	1	1	1
St. John the Baptist						1	1	1	1	1
St. Martin						1	1	1	1	1
St. Mary						1	1	1	1	1
St. Tammany						1	1	1	1	1
Tangipahoa						1	1	1	1	1
Terrebonne						1	1	1	1	1
Vermilion						1	1	1	1	1
Mississippi						3	3	3	3	3
Hancock						1	1	1	1	1
Harrison						1	1	1	1	1
Jackson						1	1	1	1	1
High Water			34	34	34
Alabama			3	3	3
Greene			1	1	1
Pickens			1	1	1
Sumter			1	1	1
Louisiana			17	17	17
Ascension			1	1	1
Concordia			1	1	1
East Baton Rouge			1	1	1
East Carroll			1	1	1
Iberville			1	1	1
Jefferson			1	1	1
Madison			1	1	1
Orleans			1	1	1
Plaquemines			1	1	1
Pointe Coupee			1	1	1
St. Bernard			1	1	1
St. Charles			1	1	1
St. James			1	1	1
St. John the Baptist			1	1	1
Tensas			1	1	1
West Baton Rouge			1	1	1
West Feliciana			1	1	1
Mississippi			14	14	14
Adams			1	1	1
Bolivar			1	1	1
Clay			1	1	1
Coahoma			1	1	1
DeSoto			1	1	1
Issaquena			1	1	1
Itawamba			1	1	1
Jefferson			1	1	1
Lowndes			1	1	1
Monroe			1	1	1
Tishomingo			1	1	1
Warren			1	1	1
Washington			1	1	1
Wilkinson			1	1	1
Lock Inspections								10	10
Alabama								1	1
Pickens								1	1
Louisiana								5	5
Iberville								1	1
Jefferson								1	1
Orleans								1	1
Pointe Coupee								1	1
West Baton Rouge								1	1
Mississippi								4	4
Itawamba								1	1
Lowndes								1	1
Monroe								1	1
Tishomingo								1	1
Low Water								34	34	34	34
Alabama								3	3	3	3
Greene								1	1	1	1
Pickens								1	1	1	1
Sumter								1	1	1	1
Louisiana								17	17	17	17
Ascension								1	1	1	1
Concordia								1	1	1	1
East Baton Rouge								1	1	1	1
East Carroll								1	1	1	1
Iberville								1	1	1	1
Jefferson								1	1	1	1
Madison								1	1	1	1
Orleans								1	1	1	1
Plaquemines								1	1	1	1
Pointe Coupee								1	1	1	1
St. Bernard								1	1	1	1
St. Charles								1	1	1	1
St. James								1	1	1	1
St. John the Baptist								1	1	1	1
Tensas								1	1	1	1
West Baton Rouge								1	1	1	1
West Feliciana								1	1	1	1
Mississippi								14	14	14	14
Adams								1	1	1	1
Bolivar								1	1	1	1
Clay								1	1	1	1
Coahoma								1	1	1	1
DeSoto								1	1	1	1
Issaquena								1	1	1	1
Itawamba								1	1	1	1
Jefferson								1	1	1	1
Lowndes								1	1	1	1
Monroe								1	1	1	1
Tishomingo								1	1	1	1
Warren								1	1	1	1
Washington								1	1	1	1
Wilkinson								1	1	1	1
Riverine Flooding													69
Alabama													6
Baldwin													1
Greene													1
Mobile													1
Pickens													2
Sumter													1
Louisiana													42
Ascension													2
Assumption													1
Calcasieu													1
Cameron													1
Concordia													1
East Baton Rouge													1
East Carroll													1
Iberia													1
Iberville													2
Jefferson													3
Lafourche													1
Livingston													1
Madison													1
Orleans													3
Plaquemines													2
Pointe Coupee													2
St. Bernard													2
St. Charles													2
St. James													2
St. John the Baptist													2
St. Martin													1
St. Mary													1
St. Tammany													1
Tangipahoa													1
Tensas													1
Terrebonne													1
Vermilion													1
West Baton Rouge													2
West Feliciana													1
Mississippi													21
Adams													1
Bolivar													1
Clay													1
Coahoma													1
DeSoto													1
Hancock													1
Harrison													1
Issaquena													1
Itawamba													2
Jackson													1
Jefferson													1
Lowndes													2
Monroe													2
Tishomingo													2
Warren													1
Washington													1
Wilkinson													1
Lock and Dam Repairs													1
Alabama													1
Mobile													1
Geotechnical													213
Landslide													213
Alabama													67
Autauga													1
Baldwin													1
Barbour													1
Bibb													1
Blount													1
Bullock													1
Butler													1
Calhoun													1
Chambers													1
Cherokee													1
Chilton													1
Choctaw													1
Clarke													1
Clay													1
Cleburne													1
Coffee													1
Colbert													1
Conecuh													1
Coosa													1
Covington													1
Crenshaw													1
Cullman													1
Dale													1
Dallas													1
DeKalb													1
Elmore													1
Escambia													1
Etowah													1
Fayette													1
Franklin													1
Geneva													1
Greene													1
Hale													1
Henry													1
Houston													1
Jackson													1
Jefferson													1
Lamar													1
Lauderdale													1
Lawrence													1
Lee													1
Limestone													1
Lowndes													1
Macon													1
Madison													1
Marengo													1
Marion													1
Marshall													1
Mobile													1
Monroe													1
Montgomery													1
Morgan													1
Perry													1
Pickens													1
Pike													1
Randolph													1
Russell													1
Shelby													1
St. Clair													1
Sumter													1
Talladega													1
Tallapoosa													1
Tuscaloosa													1
Walker													1
Washington													1
Wilcox													1
Winston													1
Louisiana													64
Acadia													1
Allen													1
Ascension													1
Assumption													1
Avoyelles													1
Beauregard													1
Bienville													1
Bossier													1
Caddo													1
Calcasieu													1
Caldwell													1
Cameron													1
Catahoula													1
Claiborne													1
Concordia													1
De Soto													1
East Baton Rouge													1
East Carroll													1
East Feliciana													1
Evangeline													1
Franklin													1
Grant													1
Iberia													1
Iberville													1
Jackson													1
Jefferson													1
Jefferson Davis													1
Lafayette													1
Lafourche													1
LaSalle													1
Lincoln													1
Livingston													1
Madison													1
Morehouse													1
Natchitoches													1
Orleans													1
Ouachita													1
Plaquemines													1
Pointe Coupee													1
Rapides													1
Red River													1
Richland													1
Sabine													1
St. Bernard													1
St. Charles													1
St. Helena													1
St. James													1
St. John the Baptist													1
St. Landry													1
St. Martin													1
St. Mary													1
St. Tammany													1
Tangipahoa													1
Tensas													1
Terrebonne													1
Union													1
Vermilion													1
Vernon													1
Washington													1
Webster													1
West Baton Rouge													1
West Carroll													1
West Feliciana													1
Winn													1
Mississippi													82
Adams													1
Alcorn													1
Amite													1
Attala													1
Benton													1
Bolivar													1
Calhoun													1
Carroll													1
Chickasaw													1
Choctaw													1
Claiborne													1
Clarke													1
Clay													1
Coahoma													1
Copiah													1
Covington													1
DeSoto													1
Forrest													1
Franklin													1
George													1
Greene													1
Grenada													1
Hancock													1
Harrison													1
Hinds													1
Holmes													1
Humphreys													1
Issaquena													1
Itawamba													1
Jackson													1
Jasper													1
Jefferson													1
Jefferson Davis													1
Jones													1
Kemper													1
Lafayette													1
Lamar													1
Lauderdale													1
Lawrence													1
Leake													1
Lee													1
Leflore													1
Lincoln													1
Lowndes													1
Madison													1
Marion													1
Marshall													1
Monroe													1
Montgomery													1
Neshoba													1
Newton													1
Noxubee													1
Oktibbeha													1
Panola													1
Pearl River													1
Perry													1
Pike													1
Pontotoc													1
Prentiss													1
Quitman													1
Rankin													1
Scott													1
Sharkey													1
Simpson													1
Smith													1
Stone													1
Sunflower													1
Tallahatchie													1
Tate													1
Tippah													1
Tishomingo													1
Tunica													1
Union													1
Walthall													1
Warren													1
Washington													1
Wayne													1
Webster													1
Wilkinson													1
Winston													1
Yalobusha													1
Yazoo													1
Maritime	26	25	18	19	121	121	122	122	122	27	24	24	2
Dinner Cruises	1	1	1	1	1	1	1	1	1	1	1	1
Louisiana	1	1	1	1	1	1	1	1	1	1	1	1
Orleans	1	1	1	1	1	1	1	1	1	1	1	1
Ferry	7	7	8	8	8	8	8	8	8	8	7	7
Alabama	2	2	2	2	2	2	2	2	2	2	2	2
Baldwin	1	1	1	1	1	1	1	1	1	1	1	1
Mobile	1	1	1	1	1	1	1	1	1	1	1	1
Louisiana	5	5	5	5	5	5	5	5	5	5	5	5
Cameron	1	1	1	1	1	1	1	1	1	1	1	1
Catahoula	1	1	1	1	1	1	1	1	1	1	1	1
Orleans	1	1	1	1	1	1	1	1	1	1	1	1
Plaquemines	1	1	1	1	1	1	1	1	1	1	1	1
St. Bernard	1	1	1	1	1	1	1	1	1	1	1	1
Mississippi			1	1	1	1	1	1	1	1
Harrison			1	1	1	1	1	1	1	1
Grain Exports	7	7								7	7	7
Louisiana	7	7								7	7	7
Jefferson	1	1								1	1	1
Plaquemines	1	1								1	1	1
St. Bernard	1	1								1	1	1
St. Charles	1	1								1	1	1
St. James	1	1								1	1	1
St. John the Baptist	1	1								1	1	1
West Baton Rouge	1	1								1	1	1
Inbound Containers								1	1	1
Alabama								1	1	1
Mobile								1	1	1
Military Cargo													1
Mississippi													1
Harrison													1
River Cruises	9	8	8	8	8	8	8	8	8	8	8	7
Louisiana	5	5	5	5	5	5	5	5	5	5	5	4
Iberville	1	1	1	1	1	1	1	1	1	1	1
Orleans	1	1	1	1	1	1	1	1	1	1	1	1
St. James	1	1	1	1	1	1	1	1	1	1	1	1
West Baton Rouge	1	1	1	1	1	1	1	1	1	1	1	1
West Feliciana	1	1	1	1	1	1	1	1	1	1	1	1
Mississippi	4	3	3	3	3	3	3	3	3	3	3	3
Adams	2	1	1	1	1	1	1	1	1	1	1	1
Warren	1	1	1	1	1	1	1	1	1	1	1	1
Washington	1	1	1	1	1	1	1	1	1	1	1	1
Salt Water Barrier Install							1
Louisiana							1
Plaquemines							1
Vessel Cruises	1	1	1	2	2	2	2	2	2	2	1	1
Alabama				1	1	1	1	1	1	1
Mobile				1	1	1	1	1	1	1
Louisiana	1	1	1	1	1	1	1	1	1	1	1	1
Orleans	1	1	1	1	1	1	1	1	1	1	1	1
Recreational Boating					102	102	102	102	102
Alabama					31	31	31	31	31
Autauga					1	1	1	1	1
Baldwin					1	1	1	1	1
Barbour					1	1	1	1	1
Choctaw					1	1	1	1	1
Clarke					1	1	1	1	1
Colbert					1	1	1	1	1
Dallas					1	1	1	1	1
Elmore					1	1	1	1	1
Greene					1	1	1	1	1
Hale					1	1	1	1	1
Jackson					1	1	1	1	1
Jefferson					1	1	1	1	1
Lauderdale					1	1	1	1	1
Lawrence					1	1	1	1	1
Limestone					1	1	1	1	1
Lowndes					1	1	1	1	1
Madison					1	1	1	1	1
Marengo					1	1	1	1	1
Marshall					1	1	1	1	1
Mobile					2	2	2	2	2
Monroe					1	1	1	1	1
Montgomery					1	1	1	1	1
Morgan					1	1	1	1	1
Pickens					1	1	1	1	1
Russell					1	1	1	1	1
Sumter					1	1	1	1	1
Tuscaloosa					1	1	1	1	1
Walker					1	1	1	1	1
Washington					1	1	1	1	1
Wilcox					1	1	1	1	1
Louisiana					47	47	47	47	47
Acadia					1	1	1	1	1
Allen					1	1	1	1	1
Ascension					1	1	1	1	1
Assumption					1	1	1	1	1
Avoyelles					1	1	1	1	1
Bossier					1	1	1	1	1
Caddo					1	1	1	1	1
Calcasieu					1	1	1	1	1
Caldwell					1	1	1	1	1
Cameron					1	1	1	1	1
Catahoula					1	1	1	1	1
Claiborne					1	1	1	1	1
Concordia					1	1	1	1	1
East Baton Rouge					1	1	1	1	1
East Carroll					1	1	1	1	1
Franklin					1	1	1	1	1
Iberia					1	1	1	1	1
Iberville					1	1	1	1	1
Jefferson					1	1	1	1	1
Jefferson Davis					1	1	1	1	1
Lafayette					1	1	1	1	1
Lafourche					1	1	1	1	1
Livingston					1	1	1	1	1
Madison					1	1	1	1	1
Morehouse					1	1	1	1	1
Natchitoches					1	1	1	1	1
Orleans					1	1	1	1	1
Ouachita					1	1	1	1	1
Plaquemines					1	1	1	1	1
Pointe Coupee					1	1	1	1	1
Rapides					1	1	1	1	1
Red River					1	1	1	1	1
St. Bernard					1	1	1	1	1
St. Charles					1	1	1	1	1
St. James					1	1	1	1	1
St. John the Baptist					1	1	1	1	1
St. Landry					1	1	1	1	1
St. Martin					1	1	1	1	1
St. Mary					1	1	1	1	1
St. Tammany					1	1	1	1	1
Tangipahoa					1	1	1	1	1
Tensas					1	1	1	1	1
Terrebonne					1	1	1	1	1
Union					1	1	1	1	1
Vermilion					1	1	1	1	1
West Baton Rouge					1	1	1	1	1
West Feliciana					1	1	1	1	1
Mississippi					24	24	24	24	24
Adams					1	1	1	1	1
Bolivar					1	1	1	1	1
Clay					1	1	1	1	1
Coahoma					1	1	1	1	1
DeSoto					1	1	1	1	1
George					1	1	1	1	1
Hancock					1	1	1	1	1
Harrison					1	1	1	1	1
Humphreys					1	1	1	1	1
Issaquena					1	1	1	1	1
Itawamba					1	1	1	1	1
Jackson					1	1	1	1	1
Jefferson					1	1	1	1	1
Leflore					1	1	1	1	1
Lowndes					1	1	1	1	1
Monroe					1	1	1	1	1
Pearl River					1	1	1	1	1
Sharkey					1	1	1	1	1
Sunflower					1	1	1	1	1
Tishomingo					1	1	1	1	1
Warren					1	1	1	1	1
Washington					1	1	1	1	1
Wilkinson					1	1	1	1	1
Yazoo					1	1	1	1	1
Commerical Fishing													1
Alabama													1
Mobile													1
Mobile Exports	1	1										1
Alabama	1	1										1
Mobile	1	1										1
Metrological	659	872	1298	852	852	1278	639	639	639	233	872	659
Cold Wave	213	213	213								213	213
Alabama	67	67	67								67	67
Autauga	1	1	1								1	1
Baldwin	1	1	1								1	1
Barbour	1	1	1								1	1
Bibb	1	1	1								1	1
Blount	1	1	1								1	1
Bullock	1	1	1								1	1
Butler	1	1	1								1	1
Calhoun	1	1	1								1	1
Chambers	1	1	1								1	1
Cherokee	1	1	1								1	1
Chilton	1	1	1								1	1
Choctaw	1	1	1								1	1
Clarke	1	1	1								1	1
Clay	1	1	1								1	1
Cleburne	1	1	1								1	1
Coffee	1	1	1								1	1
Colbert	1	1	1								1	1
Conecuh	1	1	1								1	1
Coosa	1	1	1								1	1
Covington	1	1	1								1	1
Crenshaw	1	1	1								1	1
Cullman	1	1	1								1	1
Dale	1	1	1								1	1
Dallas	1	1	1								1	1
DeKalb	1	1	1								1	1
Elmore	1	1	1								1	1
Escambia	1	1	1								1	1
Etowah	1	1	1								1	1
Fayette	1	1	1								1	1
Franklin	1	1	1								1	1
Geneva	1	1	1								1	1
Greene	1	1	1								1	1
Hale	1	1	1								1	1
Henry	1	1	1								1	1
Houston	1	1	1								1	1
Jackson	1	1	1								1	1
Jefferson	1	1	1								1	1
Lamar	1	1	1								1	1
Lauderdale	1	1	1								1	1
Lawrence	1	1	1								1	1
Lee	1	1	1								1	1
Limestone	1	1	1								1	1
Lowndes	1	1	1								1	1
Macon	1	1	1								1	1
Madison	1	1	1								1	1
Marengo	1	1	1								1	1
Marion	1	1	1								1	1
Marshall	1	1	1								1	1
Mobile	1	1	1								1	1
Monroe	1	1	1								1	1
Montgomery	1	1	1								1	1
Morgan	1	1	1								1	1
Perry	1	1	1								1	1
Pickens	1	1	1								1	1
Pike	1	1	1								1	1
Randolph	1	1	1								1	1
Russell	1	1	1								1	1
Shelby	1	1	1								1	1
St. Clair	1	1	1								1	1
Sumter	1	1	1								1	1
Talladega	1	1	1								1	1
Tallapoosa	1	1	1								1	1
Tuscaloosa	1	1	1								1	1
Walker	1	1	1								1	1
Washington	1	1	1								1	1
Wilcox	1	1	1								1	1
Winston	1	1	1								1	1
Louisiana	64	64	64								64	64
Acadia	1	1	1								1	1
Allen	1	1	1								1	1
Ascension	1	1	1								1	1
Assumption	1	1	1								1	1
Avoyelles	1	1	1								1	1
Beauregard	1	1	1								1	1
Bienville	1	1	1								1	1
Bossier	1	1	1								1	1
Caddo	1	1	1								1	1
Calcasieu	1	1	1								1	1
Caldwell	1	1	1								1	1
Cameron	1	1	1								1	1
Catahoula	1	1	1								1	1
Claiborne	1	1	1								1	1
Concordia	1	1	1								1	1
De Soto	1	1	1								1	1
East Baton Rouge	1	1	1								1	1
East Carroll	1	1	1								1	1
East Feliciana	1	1	1								1	1
Evangeline	1	1	1								1	1
Franklin	1	1	1								1	1
Grant	1	1	1								1	1
Iberia	1	1	1								1	1
Iberville	1	1	1								1	1
Jackson	1	1	1								1	1
Jefferson	1	1	1								1	1
Jefferson Davis	1	1	1								1	1
Lafayette	1	1	1								1	1
Lafourche	1	1	1								1	1
LaSalle	1	1	1								1	1
Lincoln	1	1	1								1	1
Livingston	1	1	1								1	1
Madison	1	1	1								1	1
Morehouse	1	1	1								1	1
Natchitoches	1	1	1								1	1
Orleans	1	1	1								1	1
Ouachita	1	1	1								1	1
Plaquemines	1	1	1								1	1
Pointe Coupee	1	1	1								1	1
Rapides	1	1	1								1	1
Red River	1	1	1								1	1
Richland	1	1	1								1	1
Sabine	1	1	1								1	1
St. Bernard	1	1	1								1	1
St. Charles	1	1	1								1	1
St. Helena	1	1	1								1	1
St. James	1	1	1								1	1
St. John the Baptist	1	1	1								1	1
St. Landry	1	1	1								1	1
St. Martin	1	1	1								1	1
St. Mary	1	1	1								1	1
St. Tammany	1	1	1								1	1
Tangipahoa	1	1	1								1	1
Tensas	1	1	1								1	1
Terrebonne	1	1	1								1	1
Union	1	1	1								1	1
Vermilion	1	1	1								1	1
Vernon	1	1	1								1	1
Washington	1	1	1								1	1
Webster	1	1	1								1	1
West Baton Rouge	1	1	1								1	1
West Carroll	1	1	1								1	1
West Feliciana	1	1	1								1	1
Winn	1	1	1								1	1
Mississippi	82	82	82								82	82
Adams	1	1	1								1	1
Alcorn	1	1	1								1	1
Amite	1	1	1								1	1
Attala	1	1	1								1	1
Benton	1	1	1								1	1
Bolivar	1	1	1								1	1
Calhoun	1	1	1								1	1
Carroll	1	1	1								1	1
Chickasaw	1	1	1								1	1
Choctaw	1	1	1								1	1
Claiborne	1	1	1								1	1
Clarke	1	1	1								1	1
Clay	1	1	1								1	1
Coahoma	1	1	1								1	1
Copiah	1	1	1								1	1
Covington	1	1	1								1	1
DeSoto	1	1	1								1	1
Forrest	1	1	1								1	1
Franklin	1	1	1								1	1
George	1	1	1								1	1
Greene	1	1	1								1	1
Grenada	1	1	1								1	1
Hancock	1	1	1								1	1
Harrison	1	1	1								1	1
Hinds	1	1	1								1	1
Holmes	1	1	1								1	1
Humphreys	1	1	1								1	1
Issaquena	1	1	1								1	1
Itawamba	1	1	1								1	1
Jackson	1	1	1								1	1
Jasper	1	1	1								1	1
Jefferson	1	1	1								1	1
Jefferson Davis	1	1	1								1	1
Jones	1	1	1								1	1
Kemper	1	1	1								1	1
Lafayette	1	1	1								1	1
Lamar	1	1	1								1	1
Lauderdale	1	1	1								1	1
Lawrence	1	1	1								1	1
Leake	1	1	1								1	1
Lee	1	1	1								1	1
Leflore	1	1	1								1	1
Lincoln	1	1	1								1	1
Lowndes	1	1	1								1	1
Madison	1	1	1								1	1
Marion	1	1	1								1	1
Marshall	1	1	1								1	1
Monroe	1	1	1								1	1
Montgomery	1	1	1								1	1
Neshoba	1	1	1								1	1
Newton	1	1	1								1	1
Noxubee	1	1	1								1	1
Oktibbeha	1	1	1								1	1
Panola	1	1	1								1	1
Pearl River	1	1	1								1	1
Perry	1	1	1								1	1
Pike	1	1	1								1	1
Pontotoc	1	1	1								1	1
Prentiss	1	1	1								1	1
Quitman	1	1	1								1	1
Rankin	1	1	1								1	1
Scott	1	1	1								1	1
Sharkey	1	1	1								1	1
Simpson	1	1	1								1	1
Smith	1	1	1								1	1
Stone	1	1	1								1	1
Sunflower	1	1	1								1	1
Tallahatchie	1	1	1								1	1
Tate	1	1	1								1	1
Tippah	1	1	1								1	1
Tishomingo	1	1	1								1	1
Tunica	1	1	1								1	1
Union	1	1	1								1	1
Walthall	1	1	1								1	1
Warren	1	1	1								1	1
Washington	1	1	1								1	1
Wayne	1	1	1								1	1
Webster	1	1	1								1	1
Wilkinson	1	1	1								1	1
Winston	1	1	1								1	1
Yalobusha	1	1	1								1	1
Yazoo	1	1	1								1	1
Hail		213	213	213	213	213
Alabama		67	67	67	67	67
Autauga		1	1	1	1	1
Baldwin		1	1	1	1	1
Barbour		1	1	1	1	1
Bibb		1	1	1	1	1
Blount		1	1	1	1	1
Bullock		1	1	1	1	1
Butler		1	1	1	1	1
Calhoun		1	1	1	1	1
Chambers		1	1	1	1	1
Cherokee		1	1	1	1	1
Chilton		1	1	1	1	1
Choctaw		1	1	1	1	1
Clarke		1	1	1	1	1
Clay		1	1	1	1	1
Cleburne		1	1	1	1	1
Coffee		1	1	1	1	1
Colbert		1	1	1	1	1
Conecuh		1	1	1	1	1
Coosa		1	1	1	1	1
Covington		1	1	1	1	1
Crenshaw		1	1	1	1	1
Cullman		1	1	1	1	1
Dale		1	1	1	1	1
Dallas		1	1	1	1	1
DeKalb		1	1	1	1	1
Elmore		1	1	1	1	1
Escambia		1	1	1	1	1
Etowah		1	1	1	1	1
Fayette		1	1	1	1	1
Franklin		1	1	1	1	1
Geneva		1	1	1	1	1
Greene		1	1	1	1	1
Hale		1	1	1	1	1
Henry		1	1	1	1	1
Houston		1	1	1	1	1
Jackson		1	1	1	1	1
Jefferson		1	1	1	1	1
Lamar		1	1	1	1	1
Lauderdale		1	1	1	1	1
Lawrence		1	1	1	1	1
Lee		1	1	1	1	1
Limestone		1	1	1	1	1
Lowndes		1	1	1	1	1
Macon		1	1	1	1	1
Madison		1	1	1	1	1
Marengo		1	1	1	1	1
Marion		1	1	1	1	1
Marshall		1	1	1	1	1
Mobile		1	1	1	1	1
Monroe		1	1	1	1	1
Montgomery		1	1	1	1	1
Morgan		1	1	1	1	1
Perry		1	1	1	1	1
Pickens		1	1	1	1	1
Pike		1	1	1	1	1
Randolph		1	1	1	1	1
Russell		1	1	1	1	1
Shelby		1	1	1	1	1
St. Clair		1	1	1	1	1
Sumter		1	1	1	1	1
Talladega		1	1	1	1	1
Tallapoosa		1	1	1	1	1
Tuscaloosa		1	1	1	1	1
Walker		1	1	1	1	1
Washington		1	1	1	1	1
Wilcox		1	1	1	1	1
Winston		1	1	1	1	1
Louisiana		64	64	64	64	64
Acadia		1	1	1	1	1
Allen		1	1	1	1	1
Ascension		1	1	1	1	1
Assumption		1	1	1	1	1
Avoyelles		1	1	1	1	1
Beauregard		1	1	1	1	1
Bienville		1	1	1	1	1
Bossier		1	1	1	1	1
Caddo		1	1	1	1	1
Calcasieu		1	1	1	1	1
Caldwell		1	1	1	1	1
Cameron		1	1	1	1	1
Catahoula		1	1	1	1	1
Claiborne		1	1	1	1	1
Concordia		1	1	1	1	1
De Soto		1	1	1	1	1
East Baton Rouge		1	1	1	1	1
East Carroll		1	1	1	1	1
East Feliciana		1	1	1	1	1
Evangeline		1	1	1	1	1
Franklin		1	1	1	1	1
Grant		1	1	1	1	1
Iberia		1	1	1	1	1
Iberville		1	1	1	1	1
Jackson		1	1	1	1	1
Jefferson		1	1	1	1	1
Jefferson Davis		1	1	1	1	1
Lafayette		1	1	1	1	1
Lafourche		1	1	1	1	1
LaSalle		1	1	1	1	1
Lincoln		1	1	1	1	1
Livingston		1	1	1	1	1
Madison		1	1	1	1	1
Morehouse		1	1	1	1	1
Natchitoches		1	1	1	1	1
Orleans		1	1	1	1	1
Ouachita		1	1	1	1	1
Plaquemines		1	1	1	1	1
Pointe Coupee		1	1	1	1	1
Rapides		1	1	1	1	1
Red River		1	1	1	1	1
Richland		1	1	1	1	1
Sabine		1	1	1	1	1
St. Bernard		1	1	1	1	1
St. Charles		1	1	1	1	1
St. Helena		1	1	1	1	1
St. James		1	1	1	1	1
St. John the Baptist		1	1	1	1	1
St. Landry		1	1	1	1	1
St. Martin		1	1	1	1	1
St. Mary		1	1	1	1	1
St. Tammany		1	1	1	1	1
Tangipahoa		1	1	1	1	1
Tensas		1	1	1	1	1
Terrebonne		1	1	1	1	1
Union		1	1	1	1	1
Vermilion		1	1	1	1	1
Vernon		1	1	1	1	1
Washington		1	1	1	1	1
Webster		1	1	1	1	1
West Baton Rouge		1	1	1	1	1
West Carroll		1	1	1	1	1
West Feliciana		1	1	1	1	1
Winn		1	1	1	1	1
Mississippi		82	82	82	82	82
Adams		1	1	1	1	1
Alcorn		1	1	1	1	1
Amite		1	1	1	1	1
Attala		1	1	1	1	1
Benton		1	1	1	1	1
Bolivar		1	1	1	1	1
Calhoun		1	1	1	1	1
Carroll		1	1	1	1	1
Chickasaw		1	1	1	1	1
Choctaw		1	1	1	1	1
Claiborne		1	1	1	1	1
Clarke		1	1	1	1	1
Clay		1	1	1	1	1
Coahoma		1	1	1	1	1
Copiah		1	1	1	1	1
Covington		1	1	1	1	1
DeSoto		1	1	1	1	1
Forrest		1	1	1	1	1
Franklin		1	1	1	1	1
George		1	1	1	1	1
Greene		1	1	1	1	1
Grenada		1	1	1	1	1
Hancock		1	1	1	1	1
Harrison		1	1	1	1	1
Hinds		1	1	1	1	1
Holmes		1	1	1	1	1
Humphreys		1	1	1	1	1
Issaquena		1	1	1	1	1
Itawamba		1	1	1	1	1
Jackson		1	1	1	1	1
Jasper		1	1	1	1	1
Jefferson		1	1	1	1	1
Jefferson Davis		1	1	1	1	1
Jones		1	1	1	1	1
Kemper		1	1	1	1	1
Lafayette		1	1	1	1	1
Lamar		1	1	1	1	1
Lauderdale		1	1	1	1	1
Lawrence		1	1	1	1	1
Leake		1	1	1	1	1
Lee		1	1	1	1	1
Leflore		1	1	1	1	1
Lincoln		1	1	1	1	1
Lowndes		1	1	1	1	1
Madison		1	1	1	1	1
Marion		1	1	1	1	1
Marshall		1	1	1	1	1
Monroe		1	1	1	1	1
Montgomery		1	1	1	1	1
Neshoba		1	1	1	1	1
Newton		1	1	1	1	1
Noxubee		1	1	1	1	1
Oktibbeha		1	1	1	1	1
Panola		1	1	1	1	1
Pearl River		1	1	1	1	1
Perry		1	1	1	1	1
Pike		1	1	1	1	1
Pontotoc		1	1	1	1	1
Prentiss		1	1	1	1	1
Quitman		1	1	1	1	1
Rankin		1	1	1	1	1
Scott		1	1	1	1	1
Sharkey		1	1	1	1	1
Simpson		1	1	1	1	1
Smith		1	1	1	1	1
Stone		1	1	1	1	1
Sunflower		1	1	1	1	1
Tallahatchie		1	1	1	1	1
Tate		1	1	1	1	1
Tippah		1	1	1	1	1
Tishomingo		1	1	1	1	1
Tunica		1	1	1	1	1
Union		1	1	1	1	1
Walthall		1	1	1	1	1
Warren		1	1	1	1	1
Washington		1	1	1	1	1
Wayne		1	1	1	1	1
Webster		1	1	1	1	1
Wilkinson		1	1	1	1	1
Winston		1	1	1	1	1
Yalobusha		1	1	1	1	1
Yazoo		1	1	1	1	1
Heat Wave						213	213	213	213
Alabama						67	67	67	67
Autauga						1	1	1	1
Baldwin						1	1	1	1
Barbour						1	1	1	1
Bibb						1	1	1	1
Blount						1	1	1	1
Bullock						1	1	1	1
Butler						1	1	1	1
Calhoun						1	1	1	1
Chambers						1	1	1	1
Cherokee						1	1	1	1
Chilton						1	1	1	1
Choctaw						1	1	1	1
Clarke						1	1	1	1
Clay						1	1	1	1
Cleburne						1	1	1	1
Coffee						1	1	1	1
Colbert						1	1	1	1
Conecuh						1	1	1	1
Coosa						1	1	1	1
Covington						1	1	1	1
Crenshaw						1	1	1	1
Cullman						1	1	1	1
Dale						1	1	1	1
Dallas						1	1	1	1
DeKalb						1	1	1	1
Elmore						1	1	1	1
Escambia						1	1	1	1
Etowah						1	1	1	1
Fayette						1	1	1	1
Franklin						1	1	1	1
Geneva						1	1	1	1
Greene						1	1	1	1
Hale						1	1	1	1
Henry						1	1	1	1
Houston						1	1	1	1
Jackson						1	1	1	1
Jefferson						1	1	1	1
Lamar						1	1	1	1
Lauderdale						1	1	1	1
Lawrence						1	1	1	1
Lee						1	1	1	1
Limestone						1	1	1	1
Lowndes						1	1	1	1
Macon						1	1	1	1
Madison						1	1	1	1
Marengo						1	1	1	1
Marion						1	1	1	1
Marshall						1	1	1	1
Mobile						1	1	1	1
Monroe						1	1	1	1
Montgomery						1	1	1	1
Morgan						1	1	1	1
Perry						1	1	1	1
Pickens						1	1	1	1
Pike						1	1	1	1
Randolph						1	1	1	1
Russell						1	1	1	1
Shelby						1	1	1	1
St. Clair						1	1	1	1
Sumter						1	1	1	1
Talladega						1	1	1	1
Tallapoosa						1	1	1	1
Tuscaloosa						1	1	1	1
Walker						1	1	1	1
Washington						1	1	1	1
Wilcox						1	1	1	1
Winston						1	1	1	1
Louisiana						64	64	64	64
Acadia						1	1	1	1
Allen						1	1	1	1
Ascension						1	1	1	1
Assumption						1	1	1	1
Avoyelles						1	1	1	1
Beauregard						1	1	1	1
Bienville						1	1	1	1
Bossier						1	1	1	1
Caddo						1	1	1	1
Calcasieu						1	1	1	1
Caldwell						1	1	1	1
Cameron						1	1	1	1
Catahoula						1	1	1	1
Claiborne						1	1	1	1
Concordia						1	1	1	1
De Soto						1	1	1	1
East Baton Rouge						1	1	1	1
East Carroll						1	1	1	1
East Feliciana						1	1	1	1
Evangeline						1	1	1	1
Franklin						1	1	1	1
Grant						1	1	1	1
Iberia						1	1	1	1
Iberville						1	1	1	1
Jackson						1	1	1	1
Jefferson						1	1	1	1
Jefferson Davis						1	1	1	1
Lafayette						1	1	1	1
Lafourche						1	1	1	1
LaSalle						1	1	1	1
Lincoln						1	1	1	1
Livingston						1	1	1	1
Madison						1	1	1	1
Morehouse						1	1	1	1
Natchitoches						1	1	1	1
Orleans						1	1	1	1
Ouachita						1	1	1	1
Plaquemines						1	1	1	1
Pointe Coupee						1	1	1	1
Rapides						1	1	1	1
Red River						1	1	1	1
Richland						1	1	1	1
Sabine						1	1	1	1
St. Bernard						1	1	1	1
St. Charles						1	1	1	1
St. Helena						1	1	1	1
St. James						1	1	1	1
St. John the Baptist						1	1	1	1
St. Landry						1	1	1	1
St. Martin						1	1	1	1
St. Mary						1	1	1	1
St. Tammany						1	1	1	1
Tangipahoa						1	1	1	1
Tensas						1	1	1	1
Terrebonne						1	1	1	1
Union						1	1	1	1
Vermilion						1	1	1	1
Vernon						1	1	1	1
Washington						1	1	1	1
Webster						1	1	1	1
West Baton Rouge						1	1	1	1
West Carroll						1	1	1	1
West Feliciana						1	1	1	1
Winn						1	1	1	1
Mississippi						82	82	82	82
Adams						1	1	1	1
Alcorn						1	1	1	1
Amite						1	1	1	1
Attala						1	1	1	1
Benton						1	1	1	1
Bolivar						1	1	1	1
Calhoun						1	1	1	1
Carroll						1	1	1	1
Chickasaw						1	1	1	1
Choctaw						1	1	1	1
Claiborne						1	1	1	1
Clarke						1	1	1	1
Clay						1	1	1	1
Coahoma						1	1	1	1
Copiah						1	1	1	1
Covington						1	1	1	1
DeSoto						1	1	1	1
Forrest						1	1	1	1
Franklin						1	1	1	1
George						1	1	1	1
Greene						1	1	1	1
Grenada						1	1	1	1
Hancock						1	1	1	1
Harrison						1	1	1	1
Hinds						1	1	1	1
Holmes						1	1	1	1
Humphreys						1	1	1	1
Issaquena						1	1	1	1
Itawamba						1	1	1	1
Jackson						1	1	1	1
Jasper						1	1	1	1
Jefferson						1	1	1	1
Jefferson Davis						1	1	1	1
Jones						1	1	1	1
Kemper						1	1	1	1
Lafayette						1	1	1	1
Lamar						1	1	1	1
Lauderdale						1	1	1	1
Lawrence						1	1	1	1
Leake						1	1	1	1
Lee						1	1	1	1
Leflore						1	1	1	1
Lincoln						1	1	1	1
Lowndes						1	1	1	1
Madison						1	1	1	1
Marion						1	1	1	1
Marshall						1	1	1	1
Monroe						1	1	1	1
Montgomery						1	1	1	1
Neshoba						1	1	1	1
Newton						1	1	1	1
Noxubee						1	1	1	1
Oktibbeha						1	1	1	1
Panola						1	1	1	1
Pearl River						1	1	1	1
Perry						1	1	1	1
Pike						1	1	1	1
Pontotoc						1	1	1	1
Prentiss						1	1	1	1
Quitman						1	1	1	1
Rankin						1	1	1	1
Scott						1	1	1	1
Sharkey						1	1	1	1
Simpson						1	1	1	1
Smith						1	1	1	1
Stone						1	1	1	1
Sunflower						1	1	1	1
Tallahatchie						1	1	1	1
Tate						1	1	1	1
Tippah						1	1	1	1
Tishomingo						1	1	1	1
Tunica						1	1	1	1
Union						1	1	1	1
Walthall						1	1	1	1
Warren						1	1	1	1
Washington						1	1	1	1
Wayne						1	1	1	1
Webster						1	1	1	1
Wilkinson						1	1	1	1
Winston						1	1	1	1
Yalobusha						1	1	1	1
Yazoo						1	1	1	1
Hurricane						213	213	213	213	213	213
Alabama						67	67	67	67	67	67
Autauga						1	1	1	1	1	1
Baldwin						1	1	1	1	1	1
Barbour						1	1	1	1	1	1
Bibb						1	1	1	1	1	1
Blount						1	1	1	1	1	1
Bullock						1	1	1	1	1	1
Butler						1	1	1	1	1	1
Calhoun						1	1	1	1	1	1
Chambers						1	1	1	1	1	1
Cherokee						1	1	1	1	1	1
Chilton						1	1	1	1	1	1
Choctaw						1	1	1	1	1	1
Clarke						1	1	1	1	1	1
Clay						1	1	1	1	1	1
Cleburne						1	1	1	1	1	1
Coffee						1	1	1	1	1	1
Colbert						1	1	1	1	1	1
Conecuh						1	1	1	1	1	1
Coosa						1	1	1	1	1	1
Covington						1	1	1	1	1	1
Crenshaw						1	1	1	1	1	1
Cullman						1	1	1	1	1	1
Dale						1	1	1	1	1	1
Dallas						1	1	1	1	1	1
DeKalb						1	1	1	1	1	1
Elmore						1	1	1	1	1	1
Escambia						1	1	1	1	1	1
Etowah						1	1	1	1	1	1
Fayette						1	1	1	1	1	1
Franklin						1	1	1	1	1	1
Geneva						1	1	1	1	1	1
Greene						1	1	1	1	1	1
Hale						1	1	1	1	1	1
Henry						1	1	1	1	1	1
Houston						1	1	1	1	1	1
Jackson						1	1	1	1	1	1
Jefferson						1	1	1	1	1	1
Lamar						1	1	1	1	1	1
Lauderdale						1	1	1	1	1	1
Lawrence						1	1	1	1	1	1
Lee						1	1	1	1	1	1
Limestone						1	1	1	1	1	1
Lowndes						1	1	1	1	1	1
Macon						1	1	1	1	1	1
Madison						1	1	1	1	1	1
Marengo						1	1	1	1	1	1
Marion						1	1	1	1	1	1
Marshall						1	1	1	1	1	1
Mobile						1	1	1	1	1	1
Monroe						1	1	1	1	1	1
Montgomery						1	1	1	1	1	1
Morgan						1	1	1	1	1	1
Perry						1	1	1	1	1	1
Pickens						1	1	1	1	1	1
Pike						1	1	1	1	1	1
Randolph						1	1	1	1	1	1
Russell						1	1	1	1	1	1
Shelby						1	1	1	1	1	1
St. Clair						1	1	1	1	1	1
Sumter						1	1	1	1	1	1
Talladega						1	1	1	1	1	1
Tallapoosa						1	1	1	1	1	1
Tuscaloosa						1	1	1	1	1	1
Walker						1	1	1	1	1	1
Washington						1	1	1	1	1	1
Wilcox						1	1	1	1	1	1
Winston						1	1	1	1	1	1
Louisiana						64	64	64	64	64	64
Acadia						1	1	1	1	1	1
Allen						1	1	1	1	1	1
Ascension						1	1	1	1	1	1
Assumption						1	1	1	1	1	1
Avoyelles						1	1	1	1	1	1
Beauregard						1	1	1	1	1	1
Bienville						1	1	1	1	1	1
Bossier						1	1	1	1	1	1
Caddo						1	1	1	1	1	1
Calcasieu						1	1	1	1	1	1
Caldwell						1	1	1	1	1	1
Cameron						1	1	1	1	1	1
Catahoula						1	1	1	1	1	1
Claiborne						1	1	1	1	1	1
Concordia						1	1	1	1	1	1
De Soto						1	1	1	1	1	1
East Baton Rouge						1	1	1	1	1	1
East Carroll						1	1	1	1	1	1
East Feliciana						1	1	1	1	1	1
Evangeline						1	1	1	1	1	1
Franklin						1	1	1	1	1	1
Grant						1	1	1	1	1	1
Iberia						1	1	1	1	1	1
Iberville						1	1	1	1	1	1
Jackson						1	1	1	1	1	1
Jefferson						1	1	1	1	1	1
Jefferson Davis						1	1	1	1	1	1
Lafayette						1	1	1	1	1	1
Lafourche						1	1	1	1	1	1
LaSalle						1	1	1	1	1	1
Lincoln						1	1	1	1	1	1
Livingston						1	1	1	1	1	1
Madison						1	1	1	1	1	1
Morehouse						1	1	1	1	1	1
Natchitoches						1	1	1	1	1	1
Orleans						1	1	1	1	1	1
Ouachita						1	1	1	1	1	1
Plaquemines						1	1	1	1	1	1
Pointe Coupee						1	1	1	1	1	1
Rapides						1	1	1	1	1	1
Red River						1	1	1	1	1	1
Richland						1	1	1	1	1	1
Sabine						1	1	1	1	1	1
St. Bernard						1	1	1	1	1	1
St. Charles						1	1	1	1	1	1
St. Helena						1	1	1	1	1	1
St. James						1	1	1	1	1	1
St. John the Baptist						1	1	1	1	1	1
St. Landry						1	1	1	1	1	1
St. Martin						1	1	1	1	1	1
St. Mary						1	1	1	1	1	1
St. Tammany						1	1	1	1	1	1
Tangipahoa						1	1	1	1	1	1
Tensas						1	1	1	1	1	1
Terrebonne						1	1	1	1	1	1
Union						1	1	1	1	1	1
Vermilion						1	1	1	1	1	1
Vernon						1	1	1	1	1	1
Washington						1	1	1	1	1	1
Webster						1	1	1	1	1	1
West Baton Rouge						1	1	1	1	1	1
West Carroll						1	1	1	1	1	1
West Feliciana						1	1	1	1	1	1
Winn						1	1	1	1	1	1
Mississippi						82	82	82	82	82	82
Adams						1	1	1	1	1	1
Alcorn						1	1	1	1	1	1
Amite						1	1	1	1	1	1
Attala						1	1	1	1	1	1
Benton						1	1	1	1	1	1
Bolivar						1	1	1	1	1	1
Calhoun						1	1	1	1	1	1
Carroll						1	1	1	1	1	1
Chickasaw						1	1	1	1	1	1
Choctaw						1	1	1	1	1	1
Claiborne						1	1	1	1	1	1
Clarke						1	1	1	1	1	1
Clay						1	1	1	1	1	1
Coahoma						1	1	1	1	1	1
Copiah						1	1	1	1	1	1
Covington						1	1	1	1	1	1
DeSoto						1	1	1	1	1	1
Forrest						1	1	1	1	1	1
Franklin						1	1	1	1	1	1
George						1	1	1	1	1	1
Greene						1	1	1	1	1	1
Grenada						1	1	1	1	1	1
Hancock						1	1	1	1	1	1
Harrison						1	1	1	1	1	1
Hinds						1	1	1	1	1	1
Holmes						1	1	1	1	1	1
Humphreys						1	1	1	1	1	1
Issaquena						1	1	1	1	1	1
Itawamba						1	1	1	1	1	1
Jackson						1	1	1	1	1	1
Jasper						1	1	1	1	1	1
Jefferson						1	1	1	1	1	1
Jefferson Davis						1	1	1	1	1	1
Jones						1	1	1	1	1	1
Kemper						1	1	1	1	1	1
Lafayette						1	1	1	1	1	1
Lamar						1	1	1	1	1	1
Lauderdale						1	1	1	1	1	1
Lawrence						1	1	1	1	1	1
Leake						1	1	1	1	1	1
Lee						1	1	1	1	1	1
Leflore						1	1	1	1	1	1
Lincoln						1	1	1	1	1	1
Lowndes						1	1	1	1	1	1
Madison						1	1	1	1	1	1
Marion						1	1	1	1	1	1
Marshall						1	1	1	1	1	1
Monroe						1	1	1	1	1	1
Montgomery						1	1	1	1	1	1
Neshoba						1	1	1	1	1	1
Newton						1	1	1	1	1	1
Noxubee						1	1	1	1	1	1
Oktibbeha						1	1	1	1	1	1
Panola						1	1	1	1	1	1
Pearl River						1	1	1	1	1	1
Perry						1	1	1	1	1	1
Pike						1	1	1	1	1	1
Pontotoc						1	1	1	1	1	1
Prentiss						1	1	1	1	1	1
Quitman						1	1	1	1	1	1
Rankin						1	1	1	1	1	1
Scott						1	1	1	1	1	1
Sharkey						1	1	1	1	1	1
Simpson						1	1	1	1	1	1
Smith						1	1	1	1	1	1
Stone						1	1	1	1	1	1
Sunflower						1	1	1	1	1	1
Tallahatchie						1	1	1	1	1	1
Tate						1	1	1	1	1	1
Tippah						1	1	1	1	1	1
Tishomingo						1	1	1	1	1	1
Tunica						1	1	1	1	1	1
Union						1	1	1	1	1	1
Walthall						1	1	1	1	1	1
Warren						1	1	1	1	1	1
Washington						1	1	1	1	1	1
Wayne						1	1	1	1	1	1
Webster						1	1	1	1	1	1
Wilkinson						1	1	1	1	1	1
Winston						1	1	1	1	1	1
Yalobusha						1	1	1	1	1	1
Yazoo						1	1	1	1	1	1
Ice Storm	213	213	213								213	213
Alabama	67	67	67								67	67
Autauga	1	1	1								1	1
Baldwin	1	1	1								1	1
Barbour	1	1	1								1	1
Bibb	1	1	1								1	1
Blount	1	1	1								1	1
Bullock	1	1	1								1	1
Butler	1	1	1								1	1
Calhoun	1	1	1								1	1
Chambers	1	1	1								1	1
Cherokee	1	1	1								1	1
Chilton	1	1	1								1	1
Choctaw	1	1	1								1	1
Clarke	1	1	1								1	1
Clay	1	1	1								1	1
Cleburne	1	1	1								1	1
Coffee	1	1	1								1	1
Colbert	1	1	1								1	1
Conecuh	1	1	1								1	1
Coosa	1	1	1								1	1
Covington	1	1	1								1	1
Crenshaw	1	1	1								1	1
Cullman	1	1	1								1	1
Dale	1	1	1								1	1
Dallas	1	1	1								1	1
DeKalb	1	1	1								1	1
Elmore	1	1	1								1	1
Escambia	1	1	1								1	1
Etowah	1	1	1								1	1
Fayette	1	1	1								1	1
Franklin	1	1	1								1	1
Geneva	1	1	1								1	1
Greene	1	1	1								1	1
Hale	1	1	1								1	1
Henry	1	1	1								1	1
Houston	1	1	1								1	1
Jackson	1	1	1								1	1
Jefferson	1	1	1								1	1
Lamar	1	1	1								1	1
Lauderdale	1	1	1								1	1
Lawrence	1	1	1								1	1
Lee	1	1	1								1	1
Limestone	1	1	1								1	1
Lowndes	1	1	1								1	1
Macon	1	1	1								1	1
Madison	1	1	1								1	1
Marengo	1	1	1								1	1
Marion	1	1	1								1	1
Marshall	1	1	1								1	1
Mobile	1	1	1								1	1
Monroe	1	1	1								1	1
Montgomery	1	1	1								1	1
Morgan	1	1	1								1	1
Perry	1	1	1								1	1
Pickens	1	1	1								1	1
Pike	1	1	1								1	1
Randolph	1	1	1								1	1
Russell	1	1	1								1	1
Shelby	1	1	1								1	1
St. Clair	1	1	1								1	1
Sumter	1	1	1								1	1
Talladega	1	1	1								1	1
Tallapoosa	1	1	1								1	1
Tuscaloosa	1	1	1								1	1
Walker	1	1	1								1	1
Washington	1	1	1								1	1
Wilcox	1	1	1								1	1
Winston	1	1	1								1	1
Louisiana	64	64	64								64	64
Acadia	1	1	1								1	1
Allen	1	1	1								1	1
Ascension	1	1	1								1	1
Assumption	1	1	1								1	1
Avoyelles	1	1	1								1	1
Beauregard	1	1	1								1	1
Bienville	1	1	1								1	1
Bossier	1	1	1								1	1
Caddo	1	1	1								1	1
Calcasieu	1	1	1								1	1
Caldwell	1	1	1								1	1
Cameron	1	1	1								1	1
Catahoula	1	1	1								1	1
Claiborne	1	1	1								1	1
Concordia	1	1	1								1	1
De Soto	1	1	1								1	1
East Baton Rouge	1	1	1								1	1
East Carroll	1	1	1								1	1
East Feliciana	1	1	1								1	1
Evangeline	1	1	1								1	1
Franklin	1	1	1								1	1
Grant	1	1	1								1	1
Iberia	1	1	1								1	1
Iberville	1	1	1								1	1
Jackson	1	1	1								1	1
Jefferson	1	1	1								1	1
Jefferson Davis	1	1	1								1	1
Lafayette	1	1	1								1	1
Lafourche	1	1	1								1	1
LaSalle	1	1	1								1	1
Lincoln	1	1	1								1	1
Livingston	1	1	1								1	1
Madison	1	1	1								1	1
Morehouse	1	1	1								1	1
Natchitoches	1	1	1								1	1
Orleans	1	1	1								1	1
Ouachita	1	1	1								1	1
Plaquemines	1	1	1								1	1
Pointe Coupee	1	1	1								1	1
Rapides	1	1	1								1	1
Red River	1	1	1								1	1
Richland	1	1	1								1	1
Sabine	1	1	1								1	1
St. Bernard	1	1	1								1	1
St. Charles	1	1	1								1	1
St. Helena	1	1	1								1	1
St. James	1	1	1								1	1
St. John the Baptist	1	1	1								1	1
St. Landry	1	1	1								1	1
St. Martin	1	1	1								1	1
St. Mary	1	1	1								1	1
St. Tammany	1	1	1								1	1
Tangipahoa	1	1	1								1	1
Tensas	1	1	1								1	1
Terrebonne	1	1	1								1	1
Union	1	1	1								1	1
Vermilion	1	1	1								1	1
Vernon	1	1	1								1	1
Washington	1	1	1								1	1
Webster	1	1	1								1	1
West Baton Rouge	1	1	1								1	1
West Carroll	1	1	1								1	1
West Feliciana	1	1	1								1	1
Winn	1	1	1								1	1
Mississippi	82	82	82								82	82
Adams	1	1	1								1	1
Alcorn	1	1	1								1	1
Amite	1	1	1								1	1
Attala	1	1	1								1	1
Benton	1	1	1								1	1
Bolivar	1	1	1								1	1
Calhoun	1	1	1								1	1
Carroll	1	1	1								1	1
Chickasaw	1	1	1								1	1
Choctaw	1	1	1								1	1
Claiborne	1	1	1								1	1
Clarke	1	1	1								1	1
Clay	1	1	1								1	1
Coahoma	1	1	1								1	1
Copiah	1	1	1								1	1
Covington	1	1	1								1	1
DeSoto	1	1	1								1	1
Forrest	1	1	1								1	1
Franklin	1	1	1								1	1
George	1	1	1								1	1
Greene	1	1	1								1	1
Grenada	1	1	1								1	1
Hancock	1	1	1								1	1
Harrison	1	1	1								1	1
Hinds	1	1	1								1	1
Holmes	1	1	1								1	1
Humphreys	1	1	1								1	1
Issaquena	1	1	1								1	1
Itawamba	1	1	1								1	1
Jackson	1	1	1								1	1
Jasper	1	1	1								1	1
Jefferson	1	1	1								1	1
Jefferson Davis	1	1	1								1	1
Jones	1	1	1								1	1
Kemper	1	1	1								1	1
Lafayette	1	1	1								1	1
Lamar	1	1	1								1	1
Lauderdale	1	1	1								1	1
Lawrence	1	1	1								1	1
Leake	1	1	1								1	1
Lee	1	1	1								1	1
Leflore	1	1	1								1	1
Lincoln	1	1	1								1	1
Lowndes	1	1	1								1	1
Madison	1	1	1								1	1
Marion	1	1	1								1	1
Marshall	1	1	1								1	1
Monroe	1	1	1								1	1
Montgomery	1	1	1								1	1
Neshoba	1	1	1								1	1
Newton	1	1	1								1	1
Noxubee	1	1	1								1	1
Oktibbeha	1	1	1								1	1
Panola	1	1	1								1	1
Pearl River	1	1	1								1	1
Perry	1	1	1								1	1
Pike	1	1	1								1	1
Pontotoc	1	1	1								1	1
Prentiss	1	1	1								1	1
Quitman	1	1	1								1	1
Rankin	1	1	1								1	1
Scott	1	1	1								1	1
Sharkey	1	1	1								1	1
Simpson	1	1	1								1	1
Smith	1	1	1								1	1
Stone	1	1	1								1	1
Sunflower	1	1	1								1	1
Tallahatchie	1	1	1								1	1
Tate	1	1	1								1	1
Tippah	1	1	1								1	1
Tishomingo	1	1	1								1	1
Tunica	1	1	1								1	1
Union	1	1	1								1	1
Walthall	1	1	1								1	1
Warren	1	1	1								1	1
Washington	1	1	1								1	1
Wayne	1	1	1								1	1
Webster	1	1	1								1	1
Wilkinson	1	1	1								1	1
Winston	1	1	1								1	1
Yalobusha	1	1	1								1	1
Yazoo	1	1	1								1	1
Lightning				213	213	213	213	213	213
Alabama				67	67	67	67	67	67
Autauga				1	1	1	1	1	1
Baldwin				1	1	1	1	1	1
Barbour				1	1	1	1	1	1
Bibb				1	1	1	1	1	1
Blount				1	1	1	1	1	1
Bullock				1	1	1	1	1	1
Butler				1	1	1	1	1	1
Calhoun				1	1	1	1	1	1
Chambers				1	1	1	1	1	1
Cherokee				1	1	1	1	1	1
Chilton				1	1	1	1	1	1
Choctaw				1	1	1	1	1	1
Clarke				1	1	1	1	1	1
Clay				1	1	1	1	1	1
Cleburne				1	1	1	1	1	1
Coffee				1	1	1	1	1	1
Colbert				1	1	1	1	1	1
Conecuh				1	1	1	1	1	1
Coosa				1	1	1	1	1	1
Covington				1	1	1	1	1	1
Crenshaw				1	1	1	1	1	1
Cullman				1	1	1	1	1	1
[truncated: 1,735 more rows]

## Sheet: Regional SEM-3E's
Seasonal Event Matrix - Sustainabilty											Estimated Enviromental Assesment Categories
Bruce Lambert and Jim Merten, PhD Candidates, Universtity of Antwerp
bruce.lambert@student.uantwerp.be, james.merten@student.uantwerpen.be
											213	Ecological Systems
There is no probably assigned to the event occurring within a single month, just when it may occur if it does occur.											213	Air Quality
Events listed here meet one of three conditions - the event peaks during this time of year or occurs during this time of year.											1	Water Resources
Non-Seasonal - Elements that should be noted as important, but have no seasonal element that can influnce its predictabilty											213	Land and Soil
											1	Human Health and SocieoEconomic
Criteria	Pull Down Menu	Definiation
Source-	(All)	Filter by FEMA National Registry or Literature Review
State Name Abbreviation	(All)	State - 2 Letter Abbreviation
County Name	Mobile	County or Parish Name
Navigation	(All)	Does the County or Parish have navigation facilities accruing the USACE Master Port Database (Y/N)
Coastal	(All)	Is the County or Parish in the specific state's coastal zone (Y/N)
Deep Draft	(All)	Does the County or Parish capable of receiving deep draft navigation vessels (Y/N)
Lock/Dam	(All)	Does the County or Parish have a lock or dam (Y/N)
River	(All)	Listing of Channels or Waterways within or that bound a County or Parish
Event Occurance
	January	February	March	April	May	June	July	August	September	October	November	December	Non Seasonal
Economic	1	1		1	1	1	1	2	2	2		1	1
Inbound Containers								1	1	1
Vessel Cruises				1	1	1	1	1	1	1
Commerical Fishing													1
Mobile Exports	1	1										1
Enviromental	4	5	7	5	5	7	4	4	5	3	5	4	7
Avalanche													1
Coastal Flooding/Storm Surge						1	1	1	1	1
Cold Wave	1	1	1								1	1
Drought													1
Earthquake													1
Hail		1	1	1	1	1
Heat Wave						1	1	1	1
Hurricane						1	1	1	1	1	1
Ice Storm	1	1	1								1	1
Landslide													1
Lightning				1	1	1	1	1	1
Riverine Flooding													1
Strong Winds, Thunderstorms			1	1	1	1
Termite Swarm					1
Tornado			1	1	1	1
Tsunami													1
Volcano													1
Wildfire	1	1	1	1					1	1	1	1
Winter Weather	1	1	1								1	1
Equity	1	2	1	1	4	4	4	4	4	2	1	1	2
Ferry	1	1	1	1	1	1	1	1	1	1	1	1
FSMC (Moth)					1	1	1	1	1	1
Mardi Gras		1
Recreational Boating					2	2	2	2	2
Lock and Dam Repairs													1
Endangered Species													1

## Sheet: correction table
This table is for examining the data- it is an edit check
the numbers represent the number of parishes/counties for when an event could occur. It is nothing about severity, duration, etc.
Count of Event by Parish/County	Column Labels
Categories	January	February	March	April	May	June	July	August	September	October	November	December	Non Seasonal
Cultural	1	35					1					4
Christmas Bonfires												2
Fireworks							1					1
Mardi Gras		34
Unauthorized fires	1	1										1
Ecological	213	213	213	213	38	12	12	12	225	225	213	213	1
FSMC (Moth)					12	12	12	12	12	12
Termite Swarm					26
Wildfire	213	213	213	213					213	213	213	213
Endangered Species													1
Fluvial			34	34	34	25	25	69	69	59	34		70
Coastal Flooding/Storm Surge						25	25	25	25	25
High Water			34	34	34
Lock Inspections								10	10
Low Water								34	34	34	34
Riverine Flooding													69
Lock and Dam Repairs													1
Geotechnical													426
Avalanche													213
Landslide													213
Maritime	26	25	18	19	121	121	122	122	122	27	24	24	2
Dinner Cruises	1	1	1	1	1	1	1	1	1	1	1	1
Ferry	7	7	8	8	8	8	8	8	8	8	7	7
Grain Exports	7	7								7	7	7
Inbound Containers								1	1	1
Military Cargo													1
River Cruises	9	8	8	8	8	8	8	8	8	8	8	7
Salt Water Barrier Install							1
Vessel Cruises	1	1	1	2	2	2	2	2	2	2	1	1
Recreational Boating					102	102	102	102	102
Commerical Fishing													1
Mobile Exports	1	1										1
Metrological	659	872	1298	852	852	1278	639	639	639	233	872	659
Cold Wave	213	213	213								213	213
Hail		213	213	213	213	213
Heat Wave						213	213	213	213
Hurricane						213	213	213	213	213	213
Ice Storm	213	213	213								213	213
Lightning				213	213	213	213	213	213
Marine Fog	20	20	20							20	20	20
Strong Winds, Thunderstorms			213	213	213	213
Tornado			213	213	213	213
Winter Weather	213	213	213								213	213
Non Seasonal													852
Drought													213
Earthquake													213
Tsunami													213
Volcano													213

## Sheet: Event crosswalk-realm
Seasonal Event Matrix - Event Categories
Bruce Lambert and Jim Merten, PhD Candidates, Universtity of Antwerp						Realm
bruce.lambert@student.uantwerp.be, james.merten@student.uantwerpen.be						1065	Emergency Management Realm
						1	Domain Awareness
						1	Business Continitiy
There is no probability assigned to the event occurring within a single month.						72	Supply Chain/Logistics
Events listed here meet one of three conditions - the event peaks during this time of year or occurs during this time of year.
Non-Seasonal - Elements that should be noted as important, but have no seasonal element that can influnce its predictabilty
Criteria	Pull Down Menu	Definiation
		Filter by FEMA National Registry or Literature Review
Source-	(All)	State - 2 Letter Abbreviation
Realm	(All)	County or Parish Name
Navigation	(All)	Does the County or Parish have navigation facilities accruing the USACE Master Port Database (Y/N)
Coastal	(All)	Is the County or Parish in the specific state's coastal zone (Y/N)
Deep Draft	(All)	Does the County or Parish capable of receiving deep draft navigation vessels (Y/N)
Lock/Dam	(All)	Does the County or Parish have a lock or dam (Y/N)
River	(All)	Listing of Channels or Waterways within or that bound a County or Parish
Event Occurance
	Cultural	Ecological	Fluvial	Geotechnical	Maritime	Metrological	Non Seasonal
Economic					170
Dinner Cruises					12
Grain Exports					35
Inbound Containers					3
Military Cargo					1
River Cruises					96
Vessel Cruises					19
Commerical Fishing					1
Mobile Exports					3
Enviromental		1730	452	213		9492	852
Coastal Flooding/Storm Surge			125
Cold Wave						1065
Drought							213
Earthquake							213
Hail						1065
Heat Wave						852
High Water			102
Hurricane						1278
Ice Storm						1065
Landslide				213
Lightning						1278
Lock Inspections			20
Low Water			136
Marine Fog						120
Riverine Flooding			69
Strong Winds, Thunderstorms						852
Termite Swarm		26
Tornado						852
Tsunami							213
Volcano							213
Wildfire		1704
Winter Weather						1065
Equity	41	73	1		603
Christmas Bonfires	2
Ferry					92
Fireworks	2
FSMC (Moth)		72
Mardi Gras	34
Salt Water Barrier Install					1
Unauthorized fires	3
Recreational Boating					510
Lock and Dam Repairs			1
Endangered Species		1

## Sheet: Event crosswalk-Operations-3Es
Seasonal Event Matrix - Event Categories
Bruce Lambert and Jim Merten, PhD Candidates, Universtity of Antwerp
bruce.lambert@student.uantwerp.be, james.merten@student.uantwerpen.be
There is no probability assigned to the event occurring within a single month.
Events listed here meet one of three conditions - the event peaks during this time of year or occurs during this time of year.
Non-Seasonal - Elements that should be noted as important, but have no seasonal element that can influnce its predictabilty
Criteria	Pull Down Menu	Definiation
		Filter by FEMA National Registry or Literature Review
		State - 2 Letter Abbreviation
Source-	(All)	County or Parish Name
Navigation	(All)	Does the County or Parish have navigation facilities accruing the USACE Master Port Database (Y/N)
Coastal	(All)	Is the County or Parish in the specific state's coastal zone (Y/N)
Deep Draft	(All)	Does the County or Parish capable of receiving deep draft navigation vessels (Y/N)
Lock/Dam	(All)	Does the County or Parish have a lock or dam (Y/N)
River	(All)	Listing of Channels or Waterways within or that bound a County or Parish
Event Occurance
	Cultural	Ecological	Fluvial	Geotechnical	Maritime	Metrological	Non Seasonal
Economic					170
Dinner Cruises					12
Grain Exports					35
Inbound Containers					3
Military Cargo					1
River Cruises					96
Vessel Cruises					19
Commerical Fishing					1
Mobile Exports					3
Enviromental		1730	452	213		9492	852
Coastal Flooding/Storm Surge			125
Cold Wave						1065
Drought							213
Earthquake							213
Hail						1065
Heat Wave						852
High Water			102
Hurricane						1278
Ice Storm						1065
Landslide				213
Lightning						1278
Lock Inspections			20
Low Water			136
Marine Fog						120
Riverine Flooding			69
Strong Winds, Thunderstorms						852
Termite Swarm		26
Tornado						852
Tsunami							213
Volcano							213
Wildfire		1704
Winter Weather						1065
Equity	41	73	1		603
Christmas Bonfires	2
Ferry					92
Fireworks	2
FSMC (Moth)		72
Mardi Gras	34
Salt Water Barrier Install					1
Unauthorized fires	3
Recreational Boating					510
Lock and Dam Repairs			1
Endangered Species		1

## Sheet: Regional SEM -Ops Boxes
Seasonal Event Matrix - Operational Categories
Bruce Lambert and Jim Merten, PhD Candidates, Universtity of Antwerp
bruce.lambert@student.uantwerp.be, james.merten@student.uantwerpen.be
There is no probably assigned to the event occurring within a single month.
Events listed here meet one of three conditions - the event peaks during this time of year or occurs during this time of year.
Nnn-Seasonal - Elements that should be noted as important, but have no seasonal element that can influnce its predictabilty
Criteria	Pull Down Menu	Definiation
Source-	(All)	Filter by FEMA National Registry or Literature Review
State Name Abbreviation	(All)	State - 2 Letter Abbreviation
County Name	(All)	County or Parish Name
Navigation	(All)	Does the County or Parish have navigation facilities accruing the USACE Master Port Database (Y/N)
Coastal	(All)	Is the County or Parish in the specific state's coastal zone (Y/N)
Deep Draft	(All)	Does the County or Parish capable of receiving deep draft navigation vessels (Y/N)
Lock/Dam	(All)	Does the County or Parish have a lock or dam (Y/N)
River	(All)	Listing of Channels or Waterways within or that bound a County or Parish
Event Occurance
	January	February	March	April	May	June	July	August	September	October	November	December	Non Seasonal
Cultural	1	35					1					4
Christmas Bonfires												2
Fireworks							1					1
Mardi Gras		34
Unauthorized fires	1	1										1
Ecological	213	213	213	213	38	12	12	12	225	225	213	213	1
FSMC (Moth)					12	12	12	12	12	12
Termite Swarm					26
Wildfire	213	213	213	213					213	213	213	213
Endangered Species													1
Fluvial			34	34	34	25	25	69	69	59	34		70
Coastal Flooding/Storm Surge						25	25	25	25	25
High Water			34	34	34
Lock Inspections								10	10
Low Water								34	34	34	34
Riverine Flooding													69
Lock and Dam Repairs													1
Geotechnical													426
Avalanche													213
Landslide													213
Maritime	26	25	18	19	121	121	122	122	122	27	24	24	2
Dinner Cruises	1	1	1	1	1	1	1	1	1	1	1	1
Ferry	7	7	8	8	8	8	8	8	8	8	7	7
Grain Exports	7	7								7	7	7
Inbound Containers								1	1	1
Military Cargo													1
River Cruises	9	8	8	8	8	8	8	8	8	8	8	7
Salt Water Barrier Install							1
Vessel Cruises	1	1	1	2	2	2	2	2	2	2	1	1
Recreational Boating					102	102	102	102	102
Commerical Fishing													1
Mobile Exports	1	1										1
Metrological	659	872	1298	852	852	1278	639	639	639	233	872	659
Cold Wave	213	213	213								213	213
Hail		213	213	213	213	213
Heat Wave						213	213	213	213
Hurricane						213	213	213	213	213	213
Ice Storm	213	213	213								213	213
Lightning				213	213	213	213	213	213
Marine Fog	20	20	20							20	20	20
Strong Winds, Thunderstorms			213	213	213	213
Tornado			213	213	213	213
Winter Weather	213	213	213								213	213
Non Seasonal													852
Drought													213
Earthquake													213
Tsunami													213
Volcano													213

## Sheet: HEROIC Worksheet
Event Occurance	Key=Port/Waterway Closure				Value
	7	Limited to no effects			1
	8	Some Effects			2
	188	Fully Effected			3
	4	Event Occurs in Category
	Human Factors	Equipment	Region	Operations	Infrastructure	Cargo	Notifications	In Response Plan	Reasons for Ratings (Some or Fully Effected)
Economic
Inbound Containers	1	1	1	1	1	1
Vessel Cruises	1	1	1	1	1	1
Commerical Fishing	1	1	1	2	1	1
Mobile Exports	1	1	1	1	1	1
Enviromental
Avalanche	1	1	1	2	1	1
Coastal Flooding/Storm Surge	2	2	2	2	2	2
Cold Wave	2	1	1	1	1	1
Drought	1	1	1	1	1	1
Earthquake	3	3	3	3	3	3
Hail	1	1	1	1	1	1
Heat Wave	1	1	1	1	1	1
Hurricane	3	3	3	3	3	3
Ice Storm	1	1	1	1	1	1
Landslide	2	2	2	2	2	2
Lightning	1	2	1	1	1	1
Marine Fog	1	1	1	2	1	1
Riverine Flooding	1	1	1	1	1	1
Strong Winds, Thunderstorms	1	2	1	2	1	1
Termite Swarm	1	1	1	1	1	1
Tornado	1	1	1	1	1	1
Tsunami	1	1	1	1	1	1
Volcano	3	3	3	3	3	3
Wildfire	1	1	1	1	1	1
Winter Weather	1	1	1	1	1	1
Equity
Ferry	1	1	1	1	1	1
FSMC (Moth)	1	1	1	1	1	1
Mardi Gras	2	1	1	1	1	1
Recreational Boating	1	1	1	2	1	1
Lock and Dam Repairs	1	1	1	2	1	1
Endangered Species	1	1	1	2	1	1
Other Events
Active Shooter	3	1	1	3	1	1
Cyber Attack	1	2	1	2	1	1
Pandemic	3	1	2	2	1	1
